# Supplementary material for: Efficient construction of diverse 3-cyanoindoles under novel tandem catalysis
Source: Royal Society of Chemistry journal article supplement (doi:10.1039/d0cc05439a), 2020-01-01

## Supporting Information for Efficient Construction of Diverse 3-cyanoindoles Under Novel Tandem Catalysis

*Jun Wu,<sup>a</sup> Jiabin Liu, Kerui Zhou, Zhenni He, Qian Wang, Fen Wu, Tingting Miao,<sup>\*a</sup> Jinjie Qian<sup>\*a</sup> and Qian Shi<sup>\*a</sup>*

<sup>a</sup>College of Chemistry & Materials Engineering, Wenzhou University, Wenzhou 325035, P. R. China.

E-mail: [miaott@wzu.edu.cn](mailto:miaott@wzu.edu.cn); [jinnieqian@wzu.edu.cn](mailto:jinnieqian@wzu.edu.cn); [shiq@wzu.edu.cn](mailto:shiq@wzu.edu.cn)

### Contents

|                                                                     |     |
|---------------------------------------------------------------------|-----|
| 1. General information .....                                        | S2  |
| 2. Optimization of reaction conditions in the tandem reaction ..... | S3  |
| 3. General procedure for the synthesis of substrates .....          | S4  |
| 4. General procedure for the synthesis of 3-cyanoindoles .....      | S6  |
| 5. Synthetic transformations of 3-cyanoindoles .....                | S13 |
| 6. Control experiments for the catalysis tandem reaction .....      | S17 |
| 7. References .....                                                 | S19 |
| 8. Copy of NMR spectra .....                                        | S20 |

## 1. General information

Unless otherwise noted, all experiments were carried out under an atmosphere of nitrogen using standard Schlenk techniques or in a nitrogen-filled glovebox.  $^1\text{H}$  NMR and  $^{13}\text{C}$  NMR spectra were recorded on Bruker Model Avance DMX 300 Spectrometer ( $^1\text{H}$  400 MHz and  $^{13}\text{C}$  100 MHz, respectively), Bruker Model Avance DMX 400 Spectrometer ( $^1\text{H}$  500 MHz and  $^{13}\text{C}$  125 MHz, respectively). Chemical shifts ( $\delta$ ) were given in ppm and were referenced to residual solvent or TMS peaks. High resolution mass spectra (P-ESI HRMS) were obtained on P-SIMS-Gly of Bruker Daltonics Inc. All organic solvents were dried using standard, published methods and were distilled before use. All other chemicals were used as received from Aldrich or Acros without further purification.

## 2. Optimization of reaction conditions in the tandem reaction

**Table S1:** Optimization of Reaction Conditions in the Tandem Catalysis<sup>[a]</sup>

| Entry <sup>[a]</sup> | Catalyst               | Solvent    | Conv<br>(%) <sup>[b]</sup> | Yield (%) <sup>[c]</sup> |                   |
|----------------------|------------------------|------------|----------------------------|--------------------------|-------------------|
|                      |                        |            |                            | 3a                       | 4a                |
| 1                    | PdCl <sub>2</sub> dppf | DMF        | 75                         | 73                       | -- <sup>[d]</sup> |
| 2                    | PdCl <sub>2</sub> dppf | DMSO       | 92                         | 91                       | -- <sup>[d]</sup> |
| 3                    | PdCl <sub>2</sub> dppf | DMAc       | 78                         | 78                       | -- <sup>[d]</sup> |
| 4                    | PdCl <sub>2</sub> dppf | Toluene    | 25                         | 25                       | -- <sup>[d]</sup> |
| 5                    | PdCl <sub>2</sub> dppf | Acetone    | 36                         | 34                       | -- <sup>[d]</sup> |
| 6                    | PdCl <sub>2</sub> dppf | 1,4dioxane | 65                         | 60                       | -- <sup>[d]</sup> |
| 7                    | PdCl <sub>2</sub> dppf | IPA        | 48                         | 45                       | -- <sup>[d]</sup> |

[a] Reaction conditions: **2a** (0.15 mmol, 1.0 equiv.), **1** (1.2 equiv.), KF (3 equiv., 1 M in water), Pd-cat. (10 mol %), 0.1 M solution in solvent, 130°C, 16 h. **5a** was not detected for all reactions. [b] Determined by <sup>1</sup>H NMR analysis of the crude product with 1,3,5-trimethoxybenzene as an internal standard. [c] Isolated yields. [d] Compound **3a**, **4a** or **5a** was not observed.

### 3. General procedure for the synthesis of substrates

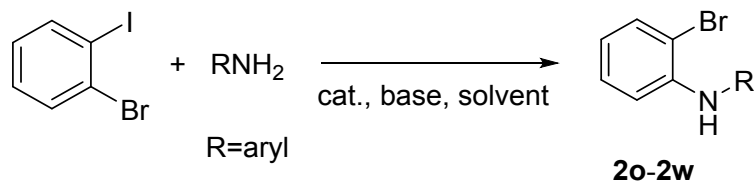

Using **2o** as an example. 1-bromo-2-iodobenzene (1.12 g, 3.96 mmol) was added to a mixture of *m*-toluidine (518 mg, 4.83 mmol), palladium(II) acetate (44.9 mg, 200  $\mu\text{mol}$ ), 1,1'-bis (diphenylphosphino) ferrocene (222 mg, 400  $\mu\text{mol}$ ), and sodium tert-butoxide (538 mg, 5.60 mmol) in toluene (5.0 mL) at 25  $^{\circ}\text{C}$  under  $\text{N}_2$ . The reaction was stirred at 110  $^{\circ}\text{C}$  for 5 h before being cooled to 25  $^{\circ}\text{C}$ , and 1 N aqueous HCl (10 mL) was added to the reaction mixture at 25  $^{\circ}\text{C}$ . The organics were extracted from the aqueous layer with ethyl acetate and the combined organic extracts were concentrated under reduced pressure. The crude product was purified by column chromatography to afford the compound **2o**.<sup>[1]</sup>

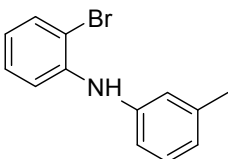 **2o**: (new compound). White oil; isolated yield 90%;  $^1\text{H}$  NMR (400 MHz,  $\text{CDCl}_3$ ):  $\delta$  (ppm) 7.51 (d,  $J = 8.0$  Hz, 1H), 7.25-7.13 (m, 3H), 6.97-6.95 (m, 2H), 6.86 (d,  $J = 4.0$  Hz, 1H), 6.72 (t,  $J = 8.0$  Hz, 1H), 6.04 (s, 1H), 2.33 (s, 3H);  $^{13}\text{C}$  NMR (125 MHz,  $\text{CDCl}_3$ ):  $\delta$  (ppm) 141.9, 139.5, 133.1, 129.4, 128.2, 123.7, 121.2, 120.9, 117.5, 116.1, 112.3, 21.6. HRMS (ESI)  $m/z$  calcd. for  $\text{C}_{13}\text{H}_{13}\text{BrN}^+$  ( $\text{M}+\text{H}$ ) $^+$  262.0226, found 262.0219.

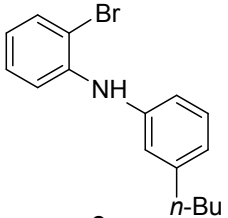 **2p**: (new compound). White oil; isolated yield 95%;  $^1\text{H}$  NMR (400 MHz,  $\text{CDCl}_3$ ):  $\delta$  (ppm) 7.52 (d,  $J = 8.0$  Hz, 1H), 7.20-7.09 (m, 6H), 6.71 (t,  $J = 8.0$  Hz, 1H), 6.05 (s, 1H), 2.61 (t,  $J = 8.0$  Hz, 2H), 1.66-1.57 (m, 2H), 1.44-1.34 (m, 2H), 0.96 (t,  $J = 8.0$  Hz, 3H);  $^{13}\text{C}$  NMR (125 MHz,  $\text{CDCl}_3$ ):  $\delta$  (ppm) 142., 139.2, 138.0, 133.0, 129.5, 128.2, 121.4, 120.4, 115.3, 111.7, 35.2, 33.9, 22.5, 14.1. HRMS (ESI)  $m/z$  calcd. for  $\text{C}_{16}\text{H}_{19}\text{BrN}^+$  ( $\text{M}+\text{H}$ ) $^+$  304.0695, found 304.0683.

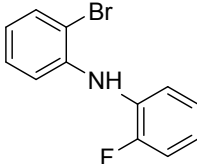 **2r**: (new compound). White oil; isolated yield 90%;  $^1\text{H}$  NMR (400

MHz, CDCl<sub>3</sub>):  $\delta$  (ppm) 7.60 (d,  $J$  = 8.0 Hz, 1H), 7.34 (d,  $J$  = 8.0 Hz, 1H), 7.28-7.24 (m, 2H), 7.18 (s, 1H), 7.05-7.02 (m, 2H), 6.86 (t,  $J$  = 8.0 Hz, 1H), 6.12 (s, 1H); <sup>13</sup>C NMR (125 MHz, CDCl<sub>3</sub>):  $\delta$  (ppm) 143.4, 140.5, 135.2, 133.3, 130.5, 128.3, 122.3, 122.2, 119.2, 117.4, 117.3, 113.4. HRMS (ESI)  $m/z$  calcd. for C<sub>12</sub>H<sub>10</sub>BrNF<sup>+</sup> (M+H)<sup>+</sup> 265.9975, found 265.9980.

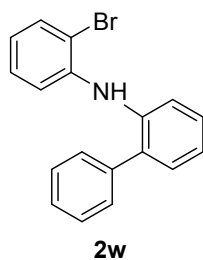

**2w**: (new compound). White oil; isolated yield 92%; <sup>1</sup>H NMR (400 MHz, CDCl<sub>3</sub>):  $\delta$  (ppm) 7.49-7.47 (m, 2H), 7.45-7.43 (m, 1H), 7.35-7.20 (m, 6H), 7.18-7.14 (m, 1H), 7.10-7.02 (m, 2H), 6.65 (t,  $J$  = 8.0 Hz, 1H), 6.06 (s, 1H); <sup>13</sup>C NMR (125 MHz, CDCl<sub>3</sub>):  $\delta$  (ppm) 142.9, 142.3, 141.6, 141.0, 133.2, 130.0, 128.9, 128.3, 127.6, 127.3, 121.7, 121.3, 119.1, 116.3, 112.6. HRMS (ESI)  $m/z$  calcd. for C<sub>18</sub>H<sub>15</sub>BrN<sup>+</sup> (M+H)<sup>+</sup> 324.0382, found 324.0392.

#### 4. General procedure for the synthesis of 3-cyanoindoles

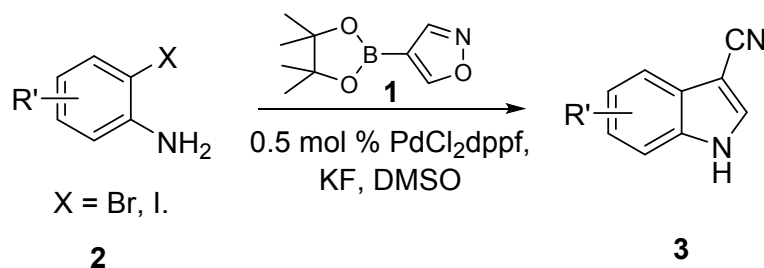

Using **3a** as an example. An oven dried schlenk tube was charged with a magnetic stir bar, **2a** (26.1 mg, 0.15 mmol), 4-(4,4,5,5-tetramethyl-1,3,2-dioxaborolan-2-yl) isoxazole (35.2 mg, 0.18 mmol), PdCl<sub>2</sub>dppf (0.5 mol %, 0.05M solution in the solvent), KF (26.2 mg, 0.45 mmol, 1 M in water). The schlenk tube was capped, and then evacuated and backfilled with nitrogen. Under a positive pressure of nitrogen, DMSO (1.5 mL) was added via a syringe and the schlenk tube was sealed and allowed to stir at 130°C for 16 h. The organics were extracted from the aqueous layer with ethyl acetate and the combined organic extracts were concentrated under reduced pressure. The crude product was purified by column chromatography to afford the compound **3a**.<sup>[2]</sup>

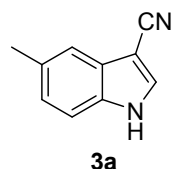

**3a**: (known compound, see: B. Liu, J. Wang, B. Zhang, Y. Sun, L. Wang, J. Chen, J. Cheng, *Chem. Commun.* 2014, 50, 2315). Yellow solid; isolated yield 91%; mp 161-162°C. <sup>1</sup>H NMR (400 MHz, CDCl<sub>3</sub>): δ (ppm) 8.79 (s, 1H), 7.69 (d, *J* = 2.0 Hz, 1H), 7.56 (s, 1H), 7.36 (d, *J* = 12.0 Hz, 1H), 7.16 (d, *J* = 12.0 Hz, 1H), 2.48 (s, 3H); <sup>13</sup>C NMR (125 MHz, CDCl<sub>3</sub>): δ (ppm) 133.4, 132.3, 131.8, 127.5, 126.2, 119.4, 116.1, 111.8, 87.2, 21.5. HRMS (ESI) *m/z* calcd. for C<sub>10</sub>H<sub>9</sub>N<sub>2</sub><sup>+</sup> (M+H)<sup>+</sup> 157.0760, found 157.0764.

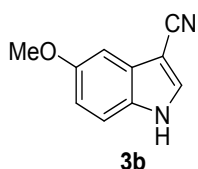

**3b**: (known compound, see: B. Liu, J. Wang, B. Zhang, Y. Sun, L. Wang, J. Chen, J. Cheng, *Chem. Commun.* 2014, 50, 2315). White oil; isolated yield 90%. <sup>1</sup>H NMR (500 MHz, CDCl<sub>3</sub>): δ (ppm) 12.06 (s, 1H), 8.16 (s, 1H), 7.44 (d, *J* = 10.0 Hz, 1H), 7.08 (s, 1H), 6.91 (d, *J* = 10.0 Hz, 1H), 3.81 (s, 3H); <sup>13</sup>C NMR (125 MHz, CDCl<sub>3</sub>): δ (ppm) 155.3, 134.3, 130.0, 127.5, 116.5, 113.7, 99.8, 84.0, 55.4. HRMS (ESI) *m/z* calcd. for C<sub>10</sub>H<sub>9</sub>N<sub>2</sub>O<sup>+</sup> (M+H)<sup>+</sup> 173.0709,

found 173.0712.

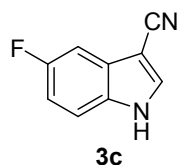

**3c:** (known compound, see: S. Paget, D. Smith, W. Takasugi, T. James, A. Anthony, H. Ren, X. Zhang, J. Zhu, Indole Derivatives And Methods For Antiviral Treatment. WO2010/117932-A1, 2010).

Yellow oil; isolated yield 80%; mp 147-148°C. <sup>1</sup>H NMR (400 MHz, DMSO): δ (ppm) 12.30 (s, 1H), 8.31 (d, *J* = 4.0 Hz, 1H), 7.57 (dd, *J*<sub>1</sub> = *J*<sub>2</sub> = 4.0 Hz, 1H), 7.41 (d, *J* = 8.0 Hz, 1H), 7.14 (t, *J* = 8.0 Hz, 1H); <sup>13</sup>C NMR (125 MHz, DMSO): δ (ppm) 159.3, 157.4, 136.2, 131.9, 127.3, 116.0, 114.3, 112.0, 111.8, 103.7, 103.5, 84.6. HRMS (ESI) *m/z* calcd. for C<sub>9</sub>H<sub>6</sub>FN<sub>2</sub><sup>+</sup> (*M*+H)<sup>+</sup> 161.0510, found 161.0515.

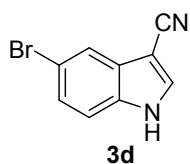

**3d:** (known compound, see: B. Liu, J. Wang, B. Zhang, Y. Sun, L. Wang, J. Chen, J. Cheng, *Chem. Commun.* 2014, 50, 2315). White solid; isolated yield 82%; mp 165-166°C. <sup>1</sup>H NMR (400 MHz, DMSO): δ (ppm) 12.13 (s, 1H), 8.29 (s, 1H), 7.78 (s, 1H), 7.51 (d, *J* = 8 Hz, 1H), 7.39 (d, *J* = 8 Hz, 1H); <sup>13</sup>C NMR (125 MHz, DMSO): δ (ppm) 135.9, 134.1, 128.4, 126.1, 120.7, 115.7, 115.0, 114.4, 84.0. HRMS (ESI) *m/z* calcd. for C<sub>10</sub>H<sub>6</sub>N<sub>3</sub><sup>+</sup> (*M*+H)<sup>+</sup> 220.9709, found 220.9711.

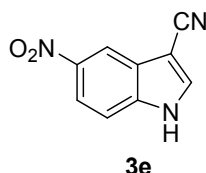

**3e:** (known compound, see: B. Liu, J. Wang, B. Zhang, Y. Sun, L. Wang, J. Chen, J. Cheng, *Chem. Commun.* 2014, 50, 2315). White solid; isolated yield 84%; mp 194-195°C. <sup>1</sup>H NMR (400 MHz, DMSO): δ (ppm) 12.81 (s, 1H), 8.52 (s, 1H), 8.46 (s, 1H), 8.14 (d, *J* = 8.0 Hz, 1H), 7.72 (d, *J* = 12.0 Hz, 1H); <sup>13</sup>C NMR (125 MHz, DMSO): δ (ppm) 142.5, 138.5, 138.3, 126.0, 118.6, 115.1, 114.9, 113.8, 86.8. HRMS (ESI) *m/z* calcd. for C<sub>9</sub>H<sub>6</sub>N<sub>3</sub>O<sub>2</sub><sup>+</sup> (*M*+H)<sup>+</sup> 188.0455, found 188.0460.

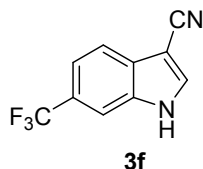

**3f:** (known compound, see: S. Paget, D. Smith, W. Takasugi, T. James, A. Anthony, H. Ren, X. Zhang, J. Zhu, Indole Derivatives And Methods For Antiviral Treatment. WO2010/117932-A1, 2010). White solid; isolated yield 85%; mp 138-139°C. <sup>1</sup>H NMR (500 MHz, DMSO): δ (ppm) 12.62 (s, 1H), 8.49 (s, 1H), 7.90 (s, 1H), 7.86 (d, *J* = 8.0 Hz, 2H), 7.52 (d, *J* = 8 Hz, 1H); <sup>13</sup>C NMR (125 MHz, DMSO): δ (ppm) 137.6, 134.3, 129.4, 123.7, 119.5, 117.9, 115.5, 110.5, 84.9. HRMS (ESI) *m/z* calcd. for C<sub>10</sub>H<sub>6</sub>F<sub>3</sub>N<sub>2</sub><sup>+</sup> (*M*+H)<sup>+</sup> 211.0478, found

211.0466.

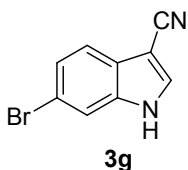

**3g**: (known compound, see: S. Paget, D. Smith, W. Takasugi, T. James, A. Anthony, H. Ren, X. Zhang, J. Zhu, Indole Derivatives And Methods For Antiviral Treatment. WO2010/117932-A1, 2010). White solid; isolated yield 89%; mp 185-186°C. <sup>1</sup>H NMR (400 MHz, DMSO): δ (ppm) 12.69 (s, 1H), 8.46 (d, *J* = 3.0 Hz, 1H), 8.18 (s, 1H), 7.67 (q, *J* = 13.2 Hz, 2H); <sup>13</sup>C NMR (125 MHz, DMSO): δ (ppm) 137.2, 137.0, 126.2, 124.0, 119.5, 115.1, 114.3, 104.2, 85.5. HRMS (ESI) *m/z* calcd. for C<sub>9</sub>H<sub>6</sub>BrN<sub>2</sub><sup>+</sup> (M+H)<sup>+</sup> 220.9709, found 220.9700.

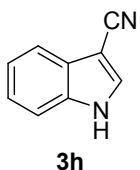

**3h**: (known compound, see: B. Liu, J. Wang, B. Zhang, Y. Sun, L. Wang, J. Chen, J. Cheng, *Chem. Commun.* 2014, 50, 2315). Yellow solid; isolated yield 80%; mp 179-180°C. <sup>1</sup>H NMR (500 MHz, DMSO): δ (ppm) 12.21 (s, 1H), 8.23 (s, 1H), 7.60 (dd, *J*<sub>1</sub> = 10.0 Hz, *J*<sub>2</sub> = 30.0 Hz, 2H), 7.37 (t, *J* = 7.5 Hz, 1H), 7.22 (t, *J* = 7.5 Hz, 1H); <sup>13</sup>C NMR (125 MHz, DMSO): δ (ppm) 135.2, 134.3, 126.7, 123.3, 121.6, 118.4, 116.3, 112.9, 84.3. HRMS (ESI) *m/z* calcd. for C<sub>9</sub>H<sub>6</sub>BrN<sub>2</sub><sup>+</sup> (M+H)<sup>+</sup> 143.0604, found 143.0610.

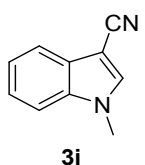

**3i**: (known compound, see: B. Liu, J. Wang, B. Zhang, Y. Sun, L. Wang, J. Chen, J. Cheng, *Chem. Commun.* 2014, 50, 2315). White oil; isolated yield 90%. <sup>1</sup>H NMR (500 MHz, CDCl<sub>3</sub>): δ (ppm) 7.74 (d, *J* = 10.0 Hz, 1H), 7.53 (s, 1H), 7.40-7.27 (m, 3H), 3.83 (s, 3H); <sup>13</sup>C NMR (125 MHz, CDCl<sub>3</sub>): δ (ppm) 136.1, 135.6, 127.8, 123.9, 122.2, 119.8, 116.0, 110.4, 85.4, 33.6. HRMS (ESI) *m/z* calcd. for C<sub>10</sub>H<sub>9</sub>N<sub>2</sub><sup>+</sup> (M+H)<sup>+</sup> 157.0760, found 157.0749.

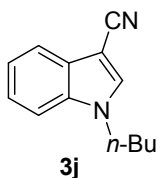

**3j**: (known compound, see: J. Xiao, Q. Li, T. Chen, L. B. Han, *Tetrahedron Lett.* 2015, 56, 5937). White oil; isolated yield 94%. <sup>1</sup>H NMR (500 MHz, CDCl<sub>3</sub>): δ (ppm) 7.77 (d, *J* = 5.0 Hz, 1H), 7.60 (s, 1H), 7.41 (d, *J* = 10.0 Hz, 1H), 7.34 (t, *J* = 7.5 Hz, 1H), 7.30 (d, *J* = 5.0 Hz, 1H), 4.16 (t, *J* = 7.5 Hz, 2H), 1.88-1.82 (m, 2H), 1.36-1.32 (m, 1H), 0.96 (t, *J* = 7.5 Hz, 3H); <sup>13</sup>C NMR (125 MHz, CDCl<sub>3</sub>): δ (ppm) 135.6, 134.7, 128.2, 123.9, 122.2, 120.2, 116.1, 110.6, 85.8, 47.1, 32.1, 20.2, 13.7. HRMS (ESI) *m/z* calcd. for C<sub>13</sub>H<sub>15</sub>N<sub>2</sub><sup>+</sup> (M+H)<sup>+</sup> 199.1230, found 199.1241.

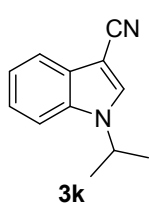

**3k**: (known compound, see: J. Xiao, Q. Li, T. Chen, L. B. Han, *S8*)

*Tetrahedron Lett.* 2015, 56, 5937). White oil; isolated yield 89%.  $^1\text{H}$  NMR (500 MHz,  $\text{CDCl}_3$ ):  $\delta$  (ppm) 7.76 (d,  $J = 10.0$  Hz, 1H), 7.72 (s, 1H), 7.46 (d,  $J = 10.0$  Hz, 1H), 7.36-7.27 (m, 2H), 4.75-4.68 (m, 1H), 1.57(d,  $J = 10.0$  Hz, 6H);  $^{13}\text{C}$  NMR (125 MHz,  $\text{CDCl}_3$ ):  $\delta$  (ppm) 135.1, 131.2, 128.2, 123.7, 122.2, 120.1, 116.3, 110.7, 85.8, 48.4, 22.8. HRMS (ESI)  $m/z$  calcd. for  $\text{C}_{12}\text{H}_{13}\text{N}_2^+$  ( $\text{M}+\text{H}$ ) $^+$  185.1073, found 185.1061.

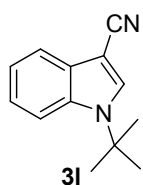

**3l**: (known compound, see: J. Xiao, Q. Li, T. Chen, L. B. Han, *Tetrahedron Lett.* 2015, 56, 5937). White oil; isolated yield 89%.  $^1\text{H}$  NMR (500 MHz,  $\text{CDCl}_3$ ):  $\delta$  (ppm) 7.81 (t,  $J = 5.0$  Hz, 2H), 7.74 (d,  $J = 10.0$  Hz, 1H), 7.31-7.29 (m, 2H), 1.80 (s, 9H);  $^{13}\text{C}$  NMR (125 MHz,  $\text{CDCl}_3$ ):  $\delta$  (ppm) 134.6, 132.7, 129.6, 123.2, 121.8, 120.3, 116.3, 114.5, 84.9, 57.7, 29.7. HRMS (ESI)  $m/z$  calcd. for  $\text{C}_{13}\text{H}_{14}\text{N}_2^+$  ( $\text{M}+\text{H}$ ) $^+$  199.1230, found 199.1234.

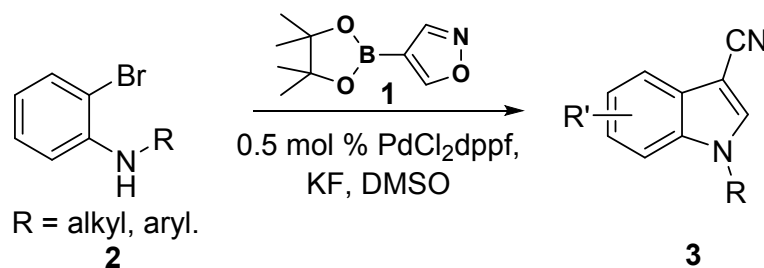

Using **3m** as an example. An oven dried Schlenk tube was charged with a magnetic stir bar, **2m** (37.1 mg, 0.15 mmol), **1** (35.2 mg, 0.18 mmol),  $\text{PdCl}_2\text{dppf}$  (0.5 mol %, 0.05M solution in the solvent), KF (26.2 mg, 0.45 mmol, 1 M in water). The Schlenk tube was capped, and then evacuated and backfilled with nitrogen. Under a positive pressure of nitrogen, DMSO (1.5 mL) was added via a syringe and the Schlenk tube was sealed and allowed to stir at  $130^\circ\text{C}$  for 16 h. The organics were extracted from the aqueous layer with ethyl acetate and the combined organic extracts were concentrated under reduced pressure. The crude product was purified by column chromatography to afford the compound **3m**.<sup>[2]</sup>

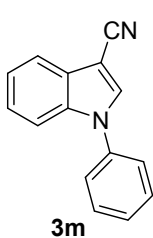

**3m**: (known compound, see: J. Xiao, Q. Li, T. Chen, L. B. Han, *Tetrahedron Lett.* 2015, 56, 5937). White oil; isolated yield 93%.  $^1\text{H}$  NMR (400 MHz,  $\text{CDCl}_3$ ):  $\delta$  (ppm) 7.85-7.82 (m, 1H), 7.81 (s, 1H), 7.60-7.56 (m, 2H), 7.53-7.47 (m, 4H), 7.36-7.34 (m, 2H);  $^{13}\text{C}$  NMR (125 MHz,  $\text{CDCl}_3$ ):  $\delta$  (ppm) 138.0, 135.8, 134.7, 130.2, 128.5, 128.1, 125.0,

124.7, 122.9, 120.2, 115.6, 111.7, 88.4. HRMS (ESI)  $m/z$  calcd. for  $C_{15}H_{11}N_2^+$  ( $M+Na$ ) $^+$  241.0736, found 241.0759.

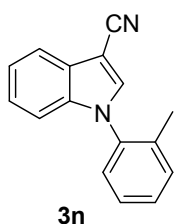

**3n:** (new compound). White oil; isolated yield 84%.  $^1H$  NMR (400 MHz,  $CDCl_3$ ):  $\delta$  (ppm) 7.84 (d,  $J = 8.0$  Hz, 1H), 7.66 (s, 1H), 7.47-7.42 (m, 2H), 7.39-7.26 (m, 4H), 7.07 (d,  $J = 8.0$  Hz, 1H), 2.05 (s, 3H);  $^{13}C$  NMR (125 MHz,  $CDCl_3$ ):  $\delta$  (ppm) 136.6, 136.5, 135.8, 135.4, 131.7, 129.7, 128.0, 127.4, 124.5, 122.7, 120.0, 115.8, 87.6, 17.5. HRMS (ESI)  $m/z$  calcd. for  $C_{16}H_{13}N_2^+$  ( $M+H$ ) $^+$  233.1073, found 233.1059.

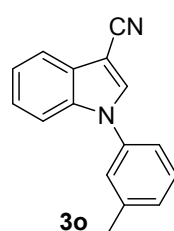

**3o:** (new compound). White oil; isolated yield 84%;  $^1H$  NMR (400 MHz,  $CDCl_3$ ):  $\delta$  (ppm) 7.84-7.82 (m, 1H), 7.79 (s, 1H), 7.52-7.50 (m, 1H), 7.47-7.43 (m, 1H), 7.37-7.33 (m, 3H), 7.29 (t,  $J = 4.0$  Hz, 3H), 2.47 (s, 3H);  $^{13}C$  NMR (125 MHz,  $CDCl_3$ ):  $\delta$  (ppm) 140.4, 138.0, 135.8, 134.8, 129.9, 129.3, 128.1, 125.7, 124.6, 122.9, 122.1, 120.2, 115.7, 111.8, 88.1, 21.5. HRMS (ESI)  $m/z$  calcd. for  $C_{16}H_{13}N_2^+$  ( $M+H$ ) $^+$  233.1073, found 233.1060.

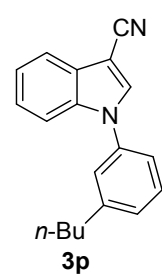

**3p:** (new compound). White solid; isolated yield 94%; mp 170-171°C.  $^1H$  NMR (400 MHz,  $CDCl_3$ ):  $\delta$  (ppm) 7.83-7.81 (m, 1H), 7.78 (s, 1H), 7.51-7.49 (m, 1H), 7.37-7.33 (m, 6H), 2.71 (t,  $J = 6.0$  Hz, 2H), 1.71-1.63 (m, 2H), 1.46-1.37 (m, 2H), 0.97 (t,  $J = 8.0$  Hz, 3H);  $^{13}C$  NMR (125 MHz,  $CDCl_3$ ):  $\delta$  (ppm) 143.7, 136.0, 135.6, 134.9, 130.0, 128.1, 124.9, 124.5, 122.8, 120.2, 115.7, 111.8, 88.0, 35.4, 33.6, 22.5, 14.1. HRMS (ESI)  $m/z$  calcd. for  $C_{19}H_{19}N_2^+$  ( $M+H$ ) $^+$  188.0455, found 188.0448.

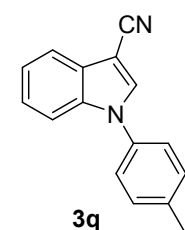

**3q:** (new compound). White solid; isolated yield 85%; mp 152-153°C.  $^1H$  NMR (400 MHz,  $CDCl_3$ ):  $\delta$  (ppm) 7.84-7.82 (m, 1H), 7.77 (s, 2H), 7.49-7.46 (m, 1H), 7.36-7.32 (m, 6H), 2.47 (s, 3H);  $^{13}C$  NMR (125 MHz,  $CDCl_3$ ):  $\delta$  (ppm) 139.4, 136.6, 136.1, 135.6, 131.4, 128.8, 125.5, 125.3, 123.6, 120.7, 116.5, 112.5, 88.6, 22.0. HRMS (ESI)  $m/z$  calcd. for  $C_{16}H_{13}N_2^+$  ( $M+H$ ) $^+$  233.1073, found 233.1066.

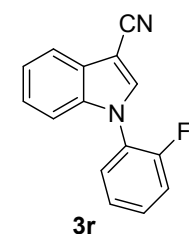

**3r:** (new compound). White solid; isolated yield 90%; mp 130-131°C.  $^1H$  NMR (400 MHz,  $CDCl_3$ ):  $\delta$  (ppm) 7.86-7.82 (m, 1H), 7.77

(s, 1H), 7.54-7.48 (m, 2H), 7.38-7.31 (m, 5H);  $^{13}\text{C}$  NMR (125 MHz,  $\text{CDCl}_3$ ):  $\delta$  (ppm) 157.9, 155.9, 136.2, 135.5, 130.5, 128.1, 127.6, 125.3, 124.9, 123.1, 120.1, 117.5, 115.3, 111.6, 89.0. HRMS (ESI)  $m/z$  calcd. for  $\text{C}_{15}\text{H}_{10}\text{FN}_2^+$  ( $\text{M}+\text{H}$ ) $^+$  237.0823, found 237.0838.

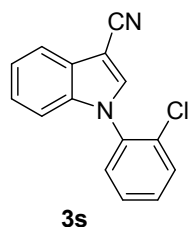

**3s:** (new compound). White solid; isolated yield 89%; mp 146-147°C.  $^1\text{H}$  NMR (400 MHz,  $\text{CDCl}_3$ ):  $\delta$  (ppm) 7.84 (d,  $J = 8.0$  Hz, 1H), 7.74 (s, 2H), 7.65 (d,  $J = 8.0$  Hz, 1H), 7.53-7.46 (m, 3H), 7.38-7.31 (m, 2H), 7.15 (d,  $J = 8.0$  Hz, 1H);  $^{13}\text{C}$  NMR (125 MHz,  $\text{CDCl}_3$ ):  $\delta$  (ppm) 136.3, 135.5, 135.0, 131.9, 131.2, 130.6, 129.3, 128.1, 127.3, 124.6, 122.9, 120.0, 115.3, 111.6, 88.4. HRMS (ESI)  $m/z$  calcd. for  $\text{C}_{15}\text{H}_{10}\text{ClN}_2^+$  ( $\text{M}+\text{H}$ ) $^+$  253.0527, found 253.0508.

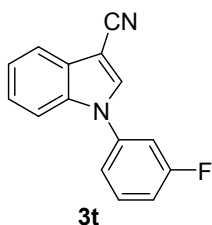

**3t:** (new compound). White solid; isolated yield 79%; mp 128-129°C.  $^1\text{H}$  NMR (400 MHz,  $\text{CDCl}_3$ ):  $\delta$  (ppm) 7.92-7.85 (m, 2H), 7.66-7.54 (m, 2H), 7.46-7.44 (m, 2H), 7.39-7.37 (m, 1H), 7.34-7.26 (m, 2H);  $^{13}\text{C}$  NMR (125 MHz,  $\text{CDCl}_3$ ):  $\delta$  (ppm) 164.3, 162.3, 137.6, 135.4, 134.4, 131.6, 128.1, 125.0, 123.2, 120.6, 120.3, 115.6, 112.6, 111.5, 89.0. HRMS (ESI)  $m/z$  calcd. for  $\text{C}_{15}\text{H}_{10}\text{FN}_2^+$  ( $\text{M}+\text{H}$ ) $^+$  237.0823, found 237.0826.

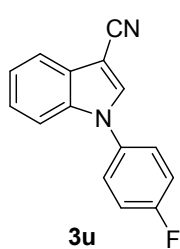

**3u:** (new compound). White solid; isolated yield 81%; mp 135-136°C.  $^1\text{H}$  NMR (400 MHz,  $\text{CDCl}_3$ ):  $\delta$  (ppm) 7.84-7.83 (m, 1H), 7.76 (s, 1H), 7.78-7.43 (m, 3H), 7.37-7.35 (m, 2H), 7.30-7.26 (m, 2H);  $^{13}\text{C}$  NMR (125 MHz,  $\text{CDCl}_3$ ):  $\delta$  (ppm) 136.0, 134.8, 127.9, 127.1, 127.0, 124.8, 123.1, 120.3, 117.3, 117.1, 111.4, 88.4. HRMS (ESI)  $m/z$  calcd. for  $\text{C}_{15}\text{H}_{10}\text{FN}_2^+$  ( $\text{M}+\text{H}$ ) $^+$  237.0823, found 237.0831.

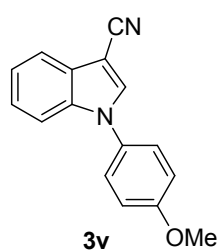

**3v:** (known compound, see: L. Zhang, P. Lu, Y. Wang, *Org. Biomol. Chem.* 2015, 13, 8322). White solid; isolated yield 92%; mp 144-145°C.  $^1\text{H}$  NMR (400 MHz,  $\text{CDCl}_3$ ):  $\delta$  (ppm) 7.83-7.81 (m, 1H), 7.74 (s, 1H), 7.44-7.32 (m, 5H), 7.07 (d,  $J = 5.0$  Hz, 2H), 3.90 (s, 3H);  $^{13}\text{C}$  NMR (125 MHz,  $\text{CDCl}_3$ ):  $\delta$  (ppm) 159.7, 136.3, 135.1, 130.8, 127.9, 126.6, 124.5, 122.8, 120.1, 115.3, 111.6, 87.7, 55.8, 53.5. HRMS (ESI)  $m/z$  calcd. for  $\text{C}_{16}\text{H}_{13}\text{N}_2\text{O}^+$  ( $\text{M}+\text{H}$ ) $^+$  249.1022, found 249.1048.

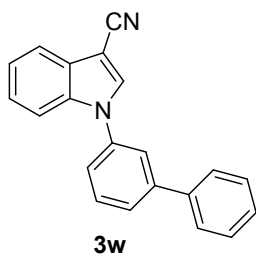

**3w:** (new compound). White solid; isolated yield 80%; mp 176-177°C. <sup>1</sup>H NMR (400 MHz, CDCl<sub>3</sub>): δ (ppm) 7.86-7.84 (m, 2H), 7.72-7.70 (m, 2H), 7.66-7.62 (m, 3H), 7.58-7.56 (m, 1H), 7.51-7.36 (m, 6H); <sup>13</sup>C NMR (125 MHz, CDCl<sub>3</sub>): δ (ppm) 143.7, 139.7, 138.5, 135.9, 134.8, 130.6, 129.2, 128.4, 128.2, 127.3, 127.2, 124.8, 123.7, 123.0, 120.3, 115.6, 111.7, 88.5. HRMS (ESI) m/z calcd. for C<sub>21</sub>H<sub>15</sub>N<sub>2</sub><sup>+</sup> (M+H)<sup>+</sup> 295.1230, found 295.1226.

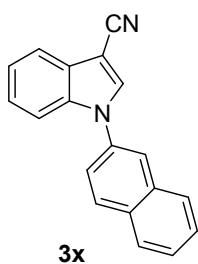

**3x:** (new compound). White solid; isolated yield 91%; mp 180-182°C. <sup>1</sup>H NMR (400 MHz, CDCl<sub>3</sub>): δ (ppm) 8.05 (d, *J* = 8.0 Hz, 1H), 7.98-7.86 (m, 5H), 7.63-7.58 (m, 4H), 7.38-7.36 (m, 2H); <sup>13</sup>C NMR (125 MHz, CDCl<sub>3</sub>): δ (ppm) 136.0, 135.4, 135.0, 133.7, 132.8, 130.3, 128.2, 128.1, 128.1, 127.6, 127.2, 124.8, 123.4, 123.0, 123.0, 120.3, 115.6, 111.7, 88.5. HRMS (ESI) m/z calcd. for C<sub>19</sub>H<sub>13</sub>N<sub>2</sub><sup>+</sup> (M+H)<sup>+</sup> 269.1073, found 269.1069.

## 5. Synthetic transformations of 3-cyanoindoles

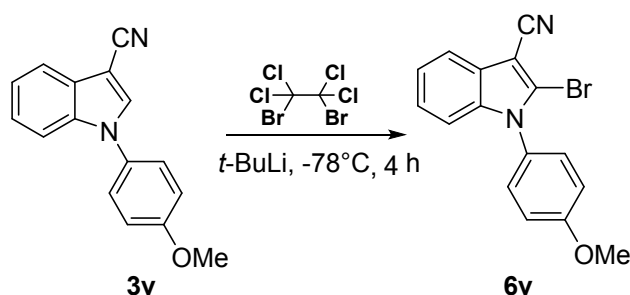

**3v** (50 mg, 0.2 mmol) was dissolved in dry THF and cooled to  $-78^\circ\text{C}$ , then *t*-BuLi (14.1 mg, 0.22 mmol) was added drop wise and mixture stirred for one hour. A solution of 1,2-dibromotetrachloroethane (84.7 mg, 0.26 mmol) was added and the mixture stirred for 4 hours while slowly warming up to r.t. and quenched with the addition of  $\text{H}_2\text{O}$ . The reaction mixture was diluted with DCM, phases separated and the organic phase evaporated in vacuo. The crude product was purified on silica column using *n*-heptane:DCM=1:1 as mobile phase to give the product **6v**.<sup>[3]</sup>

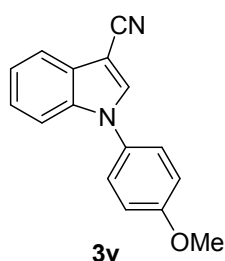

**3v**: (known compound, see: L. Zhang, P. Lu, Y. Wang, *Org. Biomol. Chem.* 2015, 13, 8322). White solid; isolated yield 92%; mp  $144\text{--}145^\circ\text{C}$ .  $^1\text{H}$  NMR (400 MHz,  $\text{CDCl}_3$ ):  $\delta$  (ppm) 7.83–7.81 (m, 1H), 7.74 (s, 1H), 7.44–7.32 (m, 5H), 7.07 (d,  $J = 5.0$  Hz, 2H), 3.90 (s, 3H);  $^{13}\text{C}$  NMR (125 MHz,  $\text{CDCl}_3$ ):  $\delta$  (ppm) 159.7, 136.3, 135.1, 130.8, 127.9, 126.6, 124.5, 122.8, 120.1, 115.3, 111.6, 87.7, 55.8, 53.5. HRMS (ESI)  $m/z$  calcd. for  $\text{C}_{16}\text{H}_{13}\text{N}_2\text{O}^+$  ( $\text{M}+\text{H}$ ) $^+$  249.1022, found 249.1048.

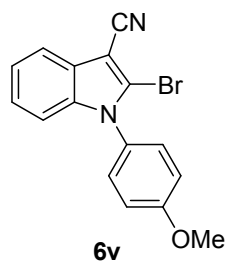

**6v**: (known compound, see: L. Zhang, P. Lu, Y. Wang, *Org. Biomol. Chem.* 2015, 13, 8322). White solid; isolated yield 44%; mp  $172\text{--}173^\circ\text{C}$ .  $^1\text{H}$  NMR (400 MHz,  $\text{CDCl}_3$ ):  $\delta$  (ppm) 7.76 (d,  $J = 10.0$  Hz, 1H), 7.32–7.26 (m, 4H), 7.12 (d,  $J = 10.0$  Hz, 3H), 3.95 (s, 3H);  $^{13}\text{C}$  NMR (125 MHz,  $\text{CDCl}_3$ ):  $\delta$  (ppm) 160.5, 137.9, 129.5, 128.3, 127.2, 124.5, 123.1, 122.7, 119.0, 115.1, 111.7, 90.8, 55.8. HRMS (ESI)  $m/z$  calcd. for  $\text{C}_{16}\text{H}_{12}\text{BrN}_2\text{O}^+$  ( $\text{M}+\text{H}$ ) $^+$  327.0128, found 327.0125.

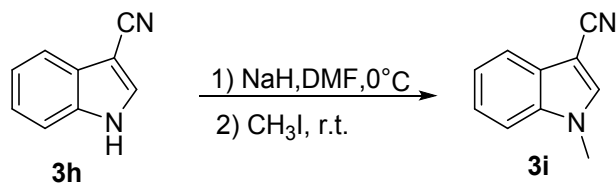

**3h** (2.0 g, 14.1 mmol) was treated with NaH (0.40 g, 16.8 mmol) in DMF (30 mL) at 0 °C for 10 min, and then iodomethane (2.4 g, 16.8 mmol) was added to the resulting mixture at r.t. After being stirred at rt for 1 h, the reaction was quenched with H<sub>2</sub>O and extracted with ethyl acetate. Combined organic layers were washed with H<sub>2</sub>O and brine, dried over anhydrous Na<sub>2</sub>SO<sub>4</sub>, and concentrated in vacuo. The residue was purified by flash chromatography on silica gel to give **3i** as a white oil. <sup>[4]</sup>

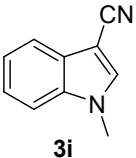 **3i**: (known compound, see: B. Liu, J. Wang, B. Zhang, Y. Sun, L. Wang, J. Chen, J. Cheng, *Chem. Commun.* 2014, 50, 2315). White oil; isolated yield 90%; <sup>1</sup>H NMR (500 MHz, CDCl<sub>3</sub>): δ (ppm) 7.74 (d, *J* = 10.0 Hz, 1H), 7.53 (s, 1H), 7.40-7.27 (m, 3H), 3.83 (s, 3H); <sup>13</sup>C NMR (125 MHz, CDCl<sub>3</sub>): δ (ppm). HRMS (ESI) *m/z* calcd. for C<sub>10</sub>H<sub>9</sub>N<sub>2</sub><sup>+</sup> (M+H)<sup>+</sup> 157.0760, found 157.0749.

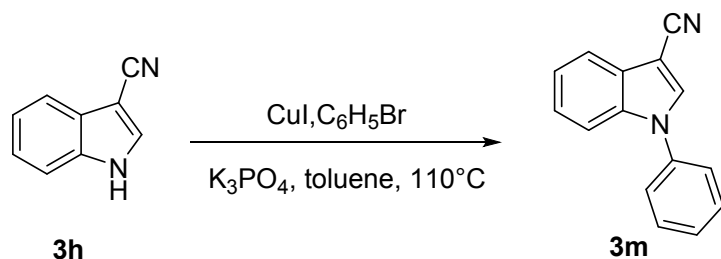

CuI (19.1 mg, 0.1 mmol), **3h** (142.1 mg, 1.0 mmol), K<sub>3</sub>PO<sub>4</sub> (445.8 mg, 2.1 mmol) and a stir bar were added to a resealable Schlenk tube. The vessel was evacuated and back-filled with nitrogen. Bromobenzene (188.4 mg, 1.2 mmol), N,N'-dimethylethylenediamine (17.7 mg, 0.2 mmol) and toluene (2 mL) were then added successively under a stream of nitrogen. The reaction tube was sealed and the contents were stirred with heating at 110 °C for 24 h. The reaction mixture was cooled to ambient temperature, diluted with ethyl acetate, filtered through a plug of silica gel, eluting with additional ethyl acetate. The filtrate was concentrated and the resulting residue was purified by column chromatography to give **3m**. <sup>[5]</sup>

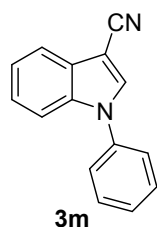

**3m**: (known compound, see: J. Xiao, Q. Li, T. Chen, L. B. Han, S14

*Tetrahedron Lett.* 2015, 56, 5937). White oil; isolated yield 93%;  $^1\text{H}$  NMR (400 MHz,  $\text{CDCl}_3$ ):  $\delta$  (ppm) 7.85-7.82 (m, 1H), 7.81 (s, 1H), 7.60-7.56 (m, 2H), 7.53-7.47 (m, 4H), 7.36-7.34 (m, 2H);  $^{13}\text{C}$  NMR (125 MHz,  $\text{CDCl}_3$ ):  $\delta$  (ppm) 138.0, 135.8, 134.7, 130.2, 128.5, 128.1, 125.0, 124.7, 122.9, 120.2, 115.6, 111.7, 88.4. HRMS (ESI)  $m/z$  calcd. for  $\text{C}_{15}\text{H}_{11}\text{N}_2^+$  ( $\text{M}+\text{Na}$ ) $^+$  241.0736, found 241.0759.

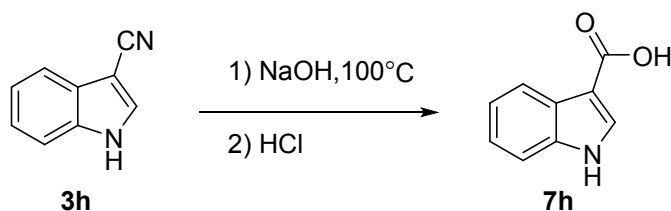

**3h** (710 mg, 5 mmol) was treated with NaOH (400mg, 10 mmol) in  $\text{H}_2\text{O}$  (10 mL) at 100 °C for 20 h. Then the mixture was acidified with dilute HCl/ $\text{H}_2\text{O}$  to pH =5. The organic layer was washed with brine and dried by  $\text{Na}_2\text{SO}_4$ , and volatiles were evaporated to give **7h** (490 mg, 70%) as a white solid.

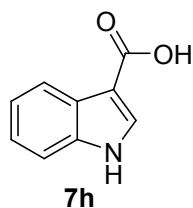

**7h**: (known compound, see: K. Nemoto, S. Tanaka, M. Konno, S. Onozawa, M. Chiba, Y. Tanaka, Y. Sasaki, R. Okubo, T. Hattori, *Tetrahedron*. 2016, 72, 734). White solid; isolated yield 90%; mp 204-205°C.  $^1\text{H}$  NMR (400 MHz, DMSO):  $\delta$  (ppm) 11.93 (s, 1H), 11.80 (s, 1H), 8.02 (d,  $J$  = 8.0 Hz, 2H), 7.46 (d,  $J$  = 8.0 Hz, 1H), 7.19-7.13 (m, 2H);  $^{13}\text{C}$  NMR (125 MHz, DMSO):  $\delta$  (ppm) 166.0, 136.5, 132.3, 126.1, 121.2, 121.0, 120.6, 112.2, 107.4. HRMS (ESI)  $m/z$  calcd. for  $\text{C}_9\text{H}_8\text{NO}_2^+$  ( $\text{M}+\text{H}$ ) $^+$  162.0550, found 162.0555.

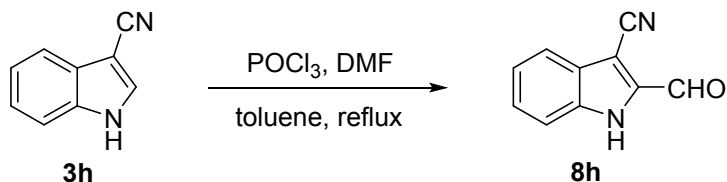

DMF (17.6 mg, 0.24 mmol) was added to  $\text{POCl}_3$  (60.8 mg, 0.4 mmol) at 0°C under an atmosphere of  $\text{N}_2$ . The resulting salt was treated with a solution of **3h** (24.5mg, 0.2mmol) in toluene (1mL). The resulting reaction mixture was heated at reflux for 42 hours under  $\text{N}_2$  atmosphere. The reaction mixture was then cooled to r.t., quenched with water. The excess  $\text{POCl}_3$  was neutralized with  $\text{Na}_2\text{CO}_3$  solution. The crude

product was extracted with DCM, the combined organic extracts dried over Na<sub>2</sub>SO<sub>4</sub>, and evaporated under reduced pressure. The crude material was purified by column chromatography to afford product **8h**.<sup>[6]</sup>

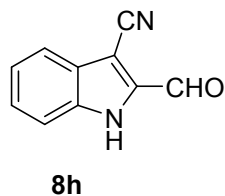

**8h**: (known compound, see: A. Toro, F. J. Martin, M. D. Surman, D. Manning, Therapeutic Agents, And Methods Of Marking And Using The Same. Canada Pat. CA2568914-A1, 2005). White oil; isolated yield 94%. <sup>1</sup>H NMR (400 MHz, DMSO): δ (ppm) 12.19 (s, 1H), 8.24 (s, 1H), 7.62 (d, *J* = 8.0 Hz, 1H), 7.54 (d, *J* = 8.0 Hz, 1H), 7.30-7.21 (m, 2H); <sup>13</sup>C NMR (125 MHz, DMSO): δ (ppm) 135.2, 134.6, 126.7, 123.4, 121.7, 118.4, 116.4, 112.9, 84.2. HRMS (ESI) *m/z* calcd. for C<sub>10</sub>H<sub>7</sub>N<sub>2</sub>O<sup>+</sup> (M+H)<sup>+</sup> 171.0553, found 171.0550.

## 6. Control experiments for the catalysis tandem reaction

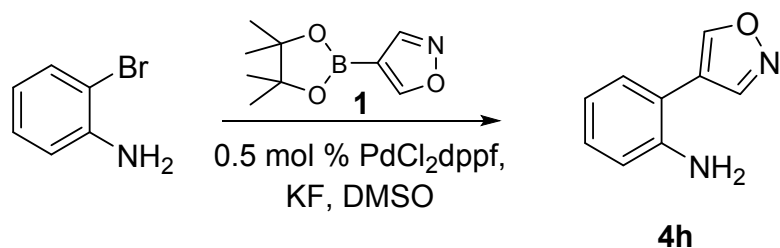

An oven dried Schlenk tube was charged with a magnetic stir bar, 2-Bromoaniline (25.8 mg, 0.15 mmol), **1** (35.2 mg, 0.18 mmol), PdCl<sub>2</sub>dppf (0.5 mol %, 0.05M solution in the solvent), KF (26.2 mg, 0.45 mmol, 1 M in water). The Schlenk tube was capped, and then evacuated and backfilled with nitrogen. Under a positive pressure of nitrogen, DMSO (1.5 mL) was added via a syringe and the Schlenk tube was sealed and allowed to stir at 50°C for 3h. The crude product was purified by flash chromatography on silica gel to provide **4h**.

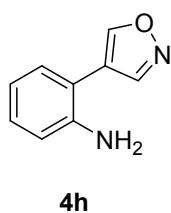

**4h**: (new compound). White oil; isolated yield 94%; <sup>1</sup>H NMR (400 MHz, CDCl<sub>3</sub>): δ (ppm) 8.66 (s, 1H), 8.52 (s, 1H), 7.20-7.17 (m, 2H), 6.85-6.79 (m, 2H), 3.73(s,2H); <sup>13</sup>C NMR (125 MHz, CDCl<sub>3</sub>): δ (ppm)154.9, 149.7, 144.3, 130.0, 129.6, 119.3, 118.0, 116.4, 114.4.

HRMS (ESI) m/z calcd. for C<sub>9</sub>H<sub>9</sub>N<sub>2</sub>O<sup>+</sup> (M+H)<sup>+</sup> 161.0709, found 161.0701.

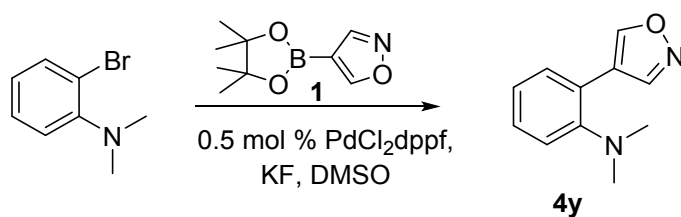

An oven dried Schlenk tube was charged with a magnetic stir bar, 2-bromo-N,N-dimethyl (30.1mg, 0.15 mmol), **1** (35.2 mg, 0.18 mmol.), PdCl<sub>2</sub>dppf (0.5 mol %, 0.05M solution in the solvent), KF (26.2 mg, 0.45 mmol, 1 M in water). The Schlenk tube was capped, and then evacuated and backfilled with nitrogen. Under a positive pressure of nitrogen, DMSO (1.5 mL) was added via a syringe and the Schlenk tube was sealed and allowed to stir at 50°C for 3 h. The crude product was purified by flash chromatography on silica gel to provide **4y**.

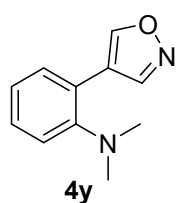

**4y**: (new compound). White oil; isolated yield 91%;  $^1\text{H}$  NMR (400 MHz,  $\text{CDCl}_3$ ):  $\delta$  (ppm) 8.87 (s, 1H), 8.75 (s, 1H), 7.37 (d,  $J = 8.0$  Hz, 1H), 7.29-7.26 (m, 1H), 7.16 (d,  $J = 8.0$  Hz, 1H), 7.07 (t,  $J = 8.0$  Hz, 1H), 2.64 (s, 6H);  $^{13}\text{C}$  NMR (125 MHz,  $\text{CDCl}_3$ ):  $\delta$  (ppm) 154.9, 152.1, 129.4, 128.9, 123.3, 119.7, 44.1. HRMS (ESI)  $m/z$  calcd. for  $\text{C}_{11}\text{H}_{13}\text{N}_2\text{O}^+$  ( $\text{M}+\text{H}$ ) $^+$  189.1022, found 189.1023.

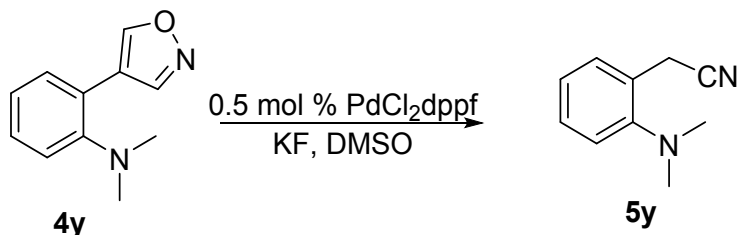

An oven dried Schlenk tube was charged with a magnetic stir bar, 2-Bromo-N,N-dimethyl (30.1mg, 0.15 mmol), **1** (35.2 mg, 0.18 mmol),  $\text{PdCl}_2\text{dppf}$  (0.5 mol %, 0.05M solution in the solvent), KF (26.2 mg, 0.45 mmol, 1 M in water). The Schlenk tube was capped, and then evacuated and backfilled with nitrogen. Under a positive pressure of nitrogen, DMSO (1.5 mL) was added via a syringe and the Schlenk tube was sealed and allowed to stir at  $130^\circ\text{C}$  for 16 h. The crude product was purified by flash chromatography on silica gel to provide **5y**.

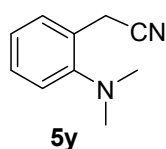

**5y**: (known compound). White oil; isolated yield 91%;  $^1\text{H}$  NMR (400 MHz,  $\text{CDCl}_3$ ):  $\delta$  (ppm) 7.44 (d,  $J = 8.0$  Hz, 1H), 7.31 (t,  $J = 8.0$  Hz, 1H), 7.18 (d,  $J = 8.0$  Hz, 1H), 7.11 (t,  $J = 8.0$  Hz, 1H), 3.84 (s, 2H), 2.66 (s, 6H);  $^{13}\text{C}$  NMR (125 MHz,  $\text{CDCl}_3$ ):  $\delta$  (ppm) 152.6, 129.5, 129.1, 125.9, 124.3, 120.5, 119.0, 45.0, 19.6. HRMS (ESI)  $m/z$  calcd. for  $\text{C}_{10}\text{H}_{13}\text{N}_2^+$  ( $\text{M}+\text{H}$ ) $^+$  161.1073, found 161.1077.

## 7. References

- [1] Y. Aoki, H. M. O'Brien, H. Kawasaki, H. Takaya, M. Nakamura, *Org. Lett.* 2019, **21**, 461.
- [2] J. Velcicky, A. Soicke, R. Steiner, H. G. Schmalz, *J. Am. Chem. Soc.* 2011, **133**, 6948.
- [3] L. Zhang, P. Lu, Y. Wang, *Org. Biomol. Chem.* 2015, **13**, 8322.
- [4] N. Yoshiaki, S. K. Kyalo, O. Shinichi, H. Tamejiro, *J. Am. Chem. Soc.* 2006, **128**, 8146.
- [5] C. A. Jon, K. Artis, L. B. Stephen, *J. Am. Chem. Soc.* 2002, **124**, 11684.
- [6] H. Yuan, L. Guo, F. Liu, Z. Miao, L. Feng, H. Gao, *ACS. Catalysis.* 2019, **9** , 3906.

## 8. Copy of NMR spectra

compound **2o**

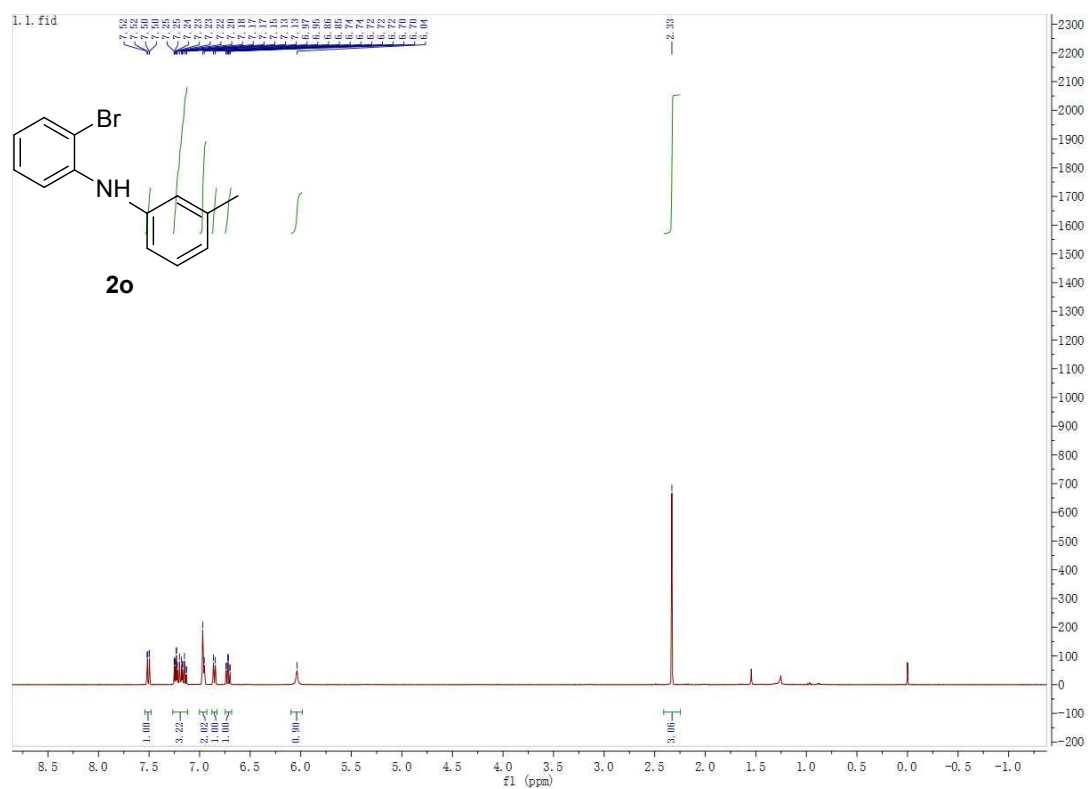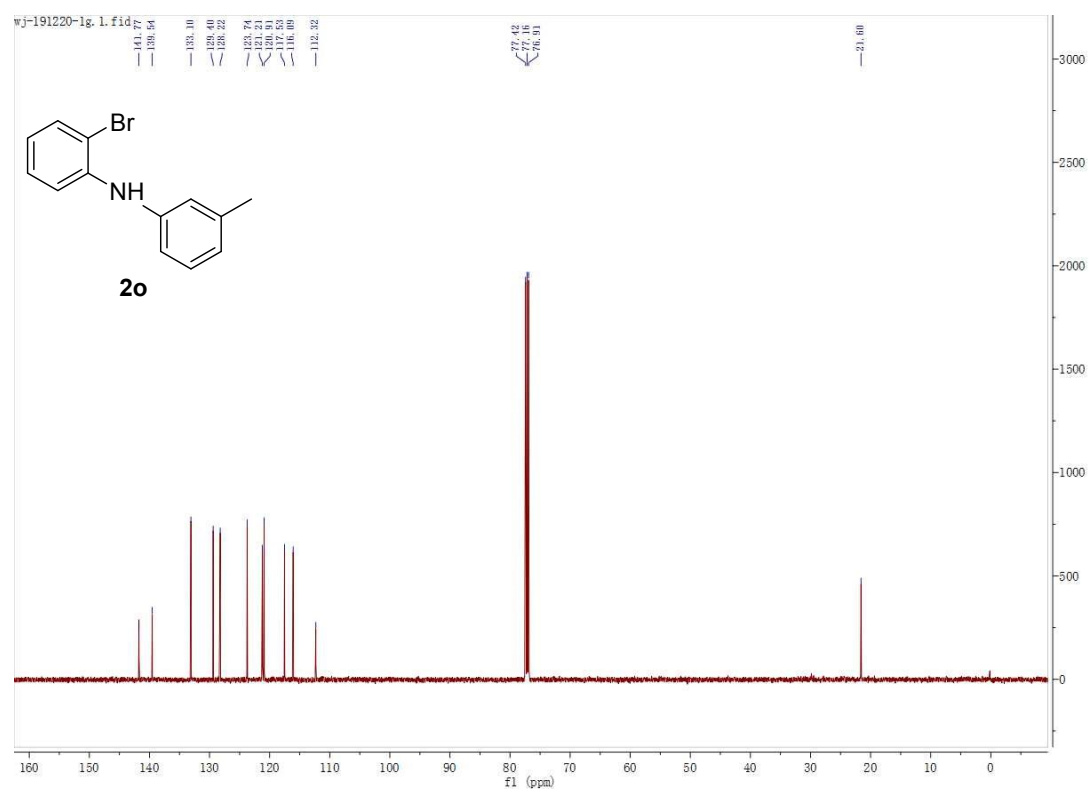

1. 1. f1d

7.53 7.51 7.49 7.47 7.45 7.43 7.41 7.39 7.37 7.35 7.33 7.31 7.29 7.27 7.25 7.23 7.21 7.19 7.17 7.15 7.13 7.11 7.09 7.07 7.05 7.03 7.01 6.99 6.97 6.95 6.93 6.91 6.89 6.87 6.85 6.83 6.81 6.79 6.77 6.75 6.73 6.71 6.69 6.67 6.65 6.63 6.61 6.59 6.57 6.55 6.53 6.51 6.49 6.47 6.45 6.43 6.41 6.39 6.37 6.35 6.33 6.31 6.29 6.27 6.25 6.23 6.21 6.19 6.17 6.15 6.13 6.11 6.09 6.07 6.05 6.03 6.01 5.99 5.97 5.95 5.93 5.91 5.89 5.87 5.85 5.83 5.81 5.79 5.77 5.75 5.73 5.71 5.69 5.67 5.65 5.63 5.61 5.59 5.57 5.55 5.53 5.51 5.49 5.47 5.45 5.43 5.41 5.39 5.37 5.35 5.33 5.31 5.29 5.27 5.25 5.23 5.21 5.19 5.17 5.15 5.13 5.11 5.09 5.07 5.05 5.03 5.01 5.00 4.99 4.97 4.95 4.93 4.91 4.89 4.87 4.85 4.83 4.81 4.79 4.77 4.75 4.73 4.71 4.69 4.67 4.65 4.63 4.61 4.59 4.57 4.55 4.53 4.51 4.49 4.47 4.45 4.43 4.41 4.39 4.37 4.35 4.33 4.31 4.29 4.27 4.25 4.23 4.21 4.19 4.17 4.15 4.13 4.11 4.09 4.07 4.05 4.03 4.01 4.00 3.99 3.97 3.95 3.93 3.91 3.89 3.87 3.85 3.83 3.81 3.79 3.77 3.75 3.73 3.71 3.69 3.67 3.65 3.63 3.61 3.59 3.57 3.55 3.53 3.51 3.49 3.47 3.45 3.43 3.41 3.39 3.37 3.35 3.33 3.31 3.29 3.27 3.25 3.23 3.21 3.19 3.17 3.15 3.13 3.11 3.09 3.07 3.05 3.03 3.01 3.00 2.99 2.97 2.95 2.93 2.91 2.89 2.87 2.85 2.83 2.81 2.79 2.77 2.75 2.73 2.71 2.69 2.67 2.65 2.63 2.61 2.59 2.57 2.55 2.53 2.51 2.49 2.47 2.45 2.43 2.41 2.39 2.37 2.35 2.33 2.31 2.29 2.27 2.25 2.23 2.21 2.19 2.17 2.15 2.13 2.11 2.09 2.07 2.05 2.03 2.01 2.00 1.99 1.97 1.95 1.93 1.91 1.89 1.87 1.85 1.83 1.81 1.79 1.77 1.75 1.73 1.71 1.69 1.67 1.65 1.63 1.61 1.59 1.57 1.55 1.53 1.51 1.49 1.47 1.45 1.43 1.41 1.39 1.37 1.35 1.33 1.31 1.29 1.27 1.25 1.23 1.21 1.19 1.17 1.15 1.13 1.11 1.09 1.07 1.05 1.03 1.01 1.00 0.99 0.97 0.95 0.93 0.91 0.89 0.87 0.85 0.83 0.81 0.79 0.77 0.75 0.73 0.71 0.69 0.67 0.65 0.63 0.61 0.59 0.57 0.55 0.53 0.51 0.49 0.47 0.45 0.43 0.41 0.39 0.37 0.35 0.33 0.31 0.29 0.27 0.25 0.23 0.21 0.19 0.17 0.15 0.13 0.11 0.09 0.07 0.05 0.03 0.01 0.00 -0.01 -0.03 -0.05 -0.07 -0.09 -0.11 -0.13 -0.15 -0.17 -0.19 -0.21 -0.23 -0.25 -0.27 -0.29 -0.31 -0.33 -0.35 -0.37 -0.39 -0.41 -0.43 -0.45 -0.47 -0.49 -0.51 -0.53 -0.55 -0.57 -0.59 -0.61 -0.63 -0.65 -0.67 -0.69 -0.71 -0.73 -0.75 -0.77 -0.79 -0.81 -0.83 -0.85 -0.87 -0.89 -0.91 -0.93 -0.95 -0.97 -0.99 -1.01 -1.03 -1.05 -1.07 -1.09 -1.11 -1.13 -1.15 -1.17 -1.19 -1.21 -1.23 -1.25 -1.27 -1.29 -1.31 -1.33 -1.35 -1.37 -1.39 -1.41 -1.43 -1.45 -1.47 -1.49 -1.51 -1.53 -1.55 -1.57 -1.59 -1.61 -1.63 -1.65 -1.67 -1.69 -1.71 -1.73 -1.75 -1.77 -1.79 -1.81 -1.83 -1.85 -1.87 -1.89 -1.91 -1.93 -1.95 -1.97 -1.99 -2.01 -2.03 -2.05 -2.07 -2.09 -2.11 -2.13 -2.15 -2.17 -2.19 -2.21 -2.23 -2.25 -2.27 -2.29 -2.31 -2.33 -2.35 -2.37 -2.39 -2.41 -2.43 -2.45 -2.47 -2.49 -2.51 -2.53 -2.55 -2.57 -2.59 -2.61 -2.63 -2.65 -2.67 -2.69 -2.71 -2.73 -2.75 -2.77 -2.79 -2.81 -2.83 -2.85 -2.87 -2.89 -2.91 -2.93 -2.95 -2.97 -2.99 -3.01 -3.03 -3.05 -3.07 -3.09 -3.11 -3.13 -3.15 -3.17 -3.19 -3.21 -3.23 -3.25 -3.27 -3.29 -3.31 -3.33 -3.35 -3.37 -3.39 -3.41 -3.43 -3.45 -3.47 -3.49 -3.51 -3.53 -3.55 -3.57 -3.59 -3.61 -3.63 -3.65 -3.67 -3.69 -3.71 -3.73 -3.75 -3.77 -3.79 -3.81 -3.83 -3.85 -3.87 -3.89 -3.91 -3.93 -3.95 -3.97 -3.99 -4.01 -4.03 -4.05 -4.07 -4.09 -4.11 -4.13 -4.15 -4.17 -4.19 -4.21 -4.23 -4.25 -4.27 -4.29 -4.31 -4.33 -4.35 -4.37 -4.39 -4.41 -4.43 -4.45 -4.47 -4.49 -4.51 -4.53 -4.55 -4.57 -4.59 -4.61 -4.63 -4.65 -4.67 -4.69 -4.71 -4.73 -4.75 -4.77 -4.79 -4.81 -4.83 -4.85 -4.87 -4.89 -4.91 -4.93 -4.95 -4.97 -4.99 -5.01 -5.03 -5.05 -5.07 -5.09 -5.11 -5.13 -5.15 -5.17 -5.19 -5.21 -5.23 -5.25 -5.27 -5.29 -5.31 -5.33 -5.35 -5.37 -5.39 -5.41 -5.43 -5.45 -5.47 -5.49 -5.51 -5.53 -5.55 -5.57 -5.59 -5.61 -5.63 -5.65 -5.67 -5.69 -5.71 -5.73 -5.75 -5.77 -5.79 -5.81 -5.83 -5.85 -5.87 -5.89 -5.91 -5.93 -5.95 -5.97 -5.99 -6.01 -6.03 -6.05 -6.07 -6.09 -6.11 -6.13 -6.15 -6.17 -6.19 -6.21 -6.23 -6.25 -6.27 -6.29 -6.31 -6.33 -6.35 -6.37 -6.39 -6.41 -6.43 -6.45 -6.47 -6.49 -6.51 -6.53 -6.55 -6.57 -6.59 -6.61 -6.63 -6.65 -6.67 -6.69 -6.71 -6.73 -6.75 -6.77 -6.79 -6.81 -6.83 -6.85 -6.87 -6.89 -6.91 -6.93 -6.95 -6.97 -6.99 -7.01 -7.03 -7.05 -7.07 -7.09 -7.11 -7.13 -7.15 -7.17 -7.19 -7.21 -7.23 -7.25 -7.27 -7.29 -7.31 -7.33 -7.35 -7.37 -7.39 -7.41 -7.43 -7.45 -7.47 -7.49 -7.51 -7.53 -7.55 -7.57 -7.59 -7.61 -7.63 -7.65 -7.67 -7.69 -7.71 -7.73 -7.75 -7.77 -7.79 -7.81 -7.83 -7.85 -7.87 -7.89 -7.91 -7.93 -7.95 -7.97 -7.99 -8.01 -8.03 -8.05 -8.07 -8.09 -8.11 -8.13 -8.15 -8.17 -8.19 -8.21 -8.23 -8.25 -8.27 -8.29 -8.31 -8.33 -8.35 -8.37 -8.39 -8.41 -8.43 -8.45 -8.47 -8.49 -8.51 -8.53 -8.55 -8.57 -8.59 -8.61 -8.63 -8.65 -8

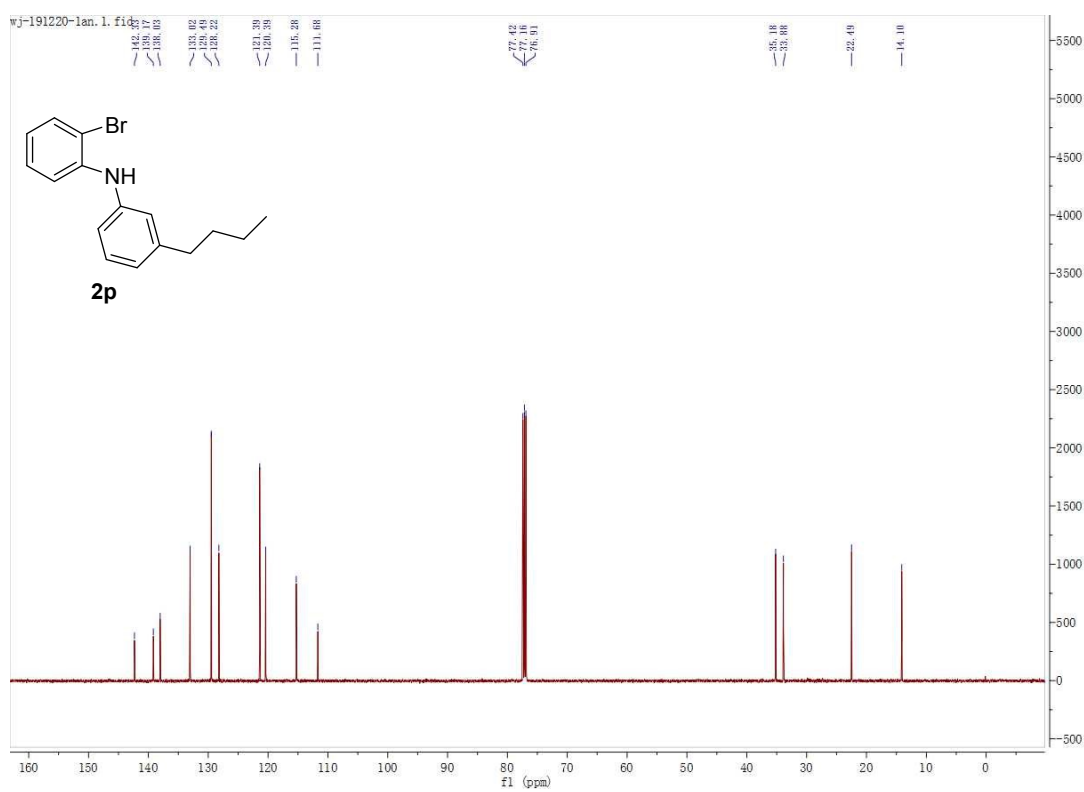

1. 1. f1d

Chemical structure of 2r (2-bromo-N-(3-fluorophenyl)aniline) is shown. The structure is a benzene ring with a bromine atom (Br) and an amino group (NH) at the 1-position, and a 3-fluorophenyl group at the 2-position. The chemical shift (f1) is indicated in ppm, ranging from 8.5 to 0.0.

Integration values are provided for the peaks:

- 7.50 ppm: 0.99
- 7.30 ppm: 1.00
- 7.20 ppm: 1.00
- 7.10 ppm: 1.00
- 7.00 ppm: 1.00
- 6.90 ppm: 1.00
- 6.80 ppm: 1.00
- 6.70 ppm: 1.00
- 6.60 ppm: 1.00
- 6.50 ppm: 1.00
- 6.40 ppm: 1.00
- 6.30 ppm: 1.00
- 6.20 ppm: 1.00
- 6.10 ppm: 1.00
- 6.00 ppm: 1.00
- 5.90 ppm: 1.00
- 5.80 ppm: 1.00
- 5.70 ppm: 1.00
- 5.60 ppm: 1.00
- 5.50 ppm: 1.00
- 5.40 ppm: 1.00
- 5.30 ppm: 1.00
- 5.20 ppm: 1.00
- 5.10 ppm: 1.00
- 5.00 ppm: 1.00
- 4.90 ppm: 1.00
- 4.80 ppm: 1.00
- 4.70 ppm: 1.00
- 4.60 ppm: 1.00
- 4.50 ppm: 1.00
- 4.40 ppm: 1.00
- 4.30 ppm: 1.00
- 4.20 ppm: 1.00
- 4.10 ppm: 1.00
- 4.00 ppm: 1.00
- 3.90 ppm: 1.00
- 3.80 ppm: 1.00
- 3.70 ppm: 1.00
- 3.60 ppm: 1.00
- 3.50 ppm: 1.00
- 3.40 ppm: 1.00
- 3.30 ppm: 1.00
- 3.20 ppm: 1.00
- 3.10 ppm: 1.00
- 3.00 ppm: 1.00
- 2.90 ppm: 1.00
- 2.80 ppm: 1.00
- 2.70 ppm: 1.00
- 2.60 ppm: 1.00
- 2.50 ppm: 1.00
- 2.40 ppm: 1.00
- 2.30 ppm: 1.00
- 2.20 ppm: 1.00
- 2.10 ppm: 1.00
- 2.00 ppm: 1.00
- 1.90 ppm: 1.00
- 1.80 ppm: 1.00
- 1.70 ppm: 1.00
- 1.60 ppm: 1.00
- 1.50 ppm: 1.00
- 1.40 ppm: 1.00
- 1.30 ppm: 1.00
- 1.20 ppm: 1.00
- 1.10 ppm: 1.00
- 1.00 ppm: 1.00
- 0.90 ppm: 1.00
- 0.80 ppm: 1.00
- 0.70 ppm: 1.00
- 0.60 ppm: 1.00
- 0.50 ppm: 1.00
- 0.40 ppm: 1.00
- 0.30 ppm: 1.00
- 0.20 ppm: 1.00
- 0.10 ppm: 1.00
- 0.00 ppm: 1.00

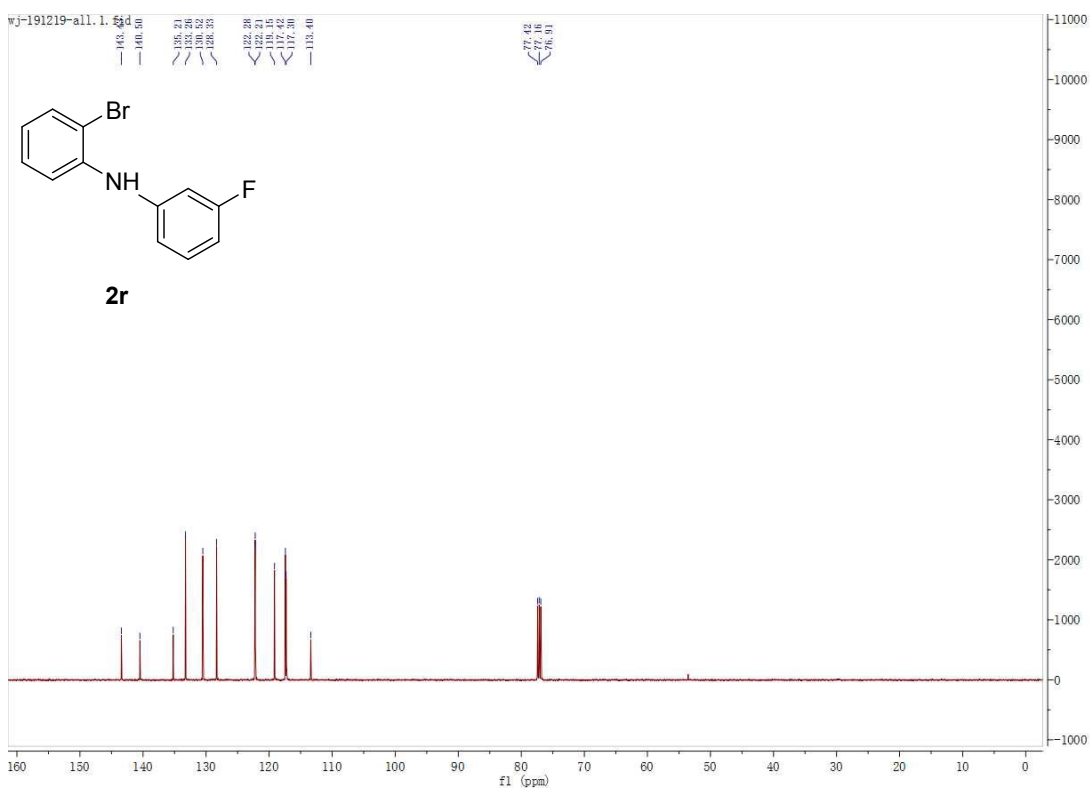

compound **2w**

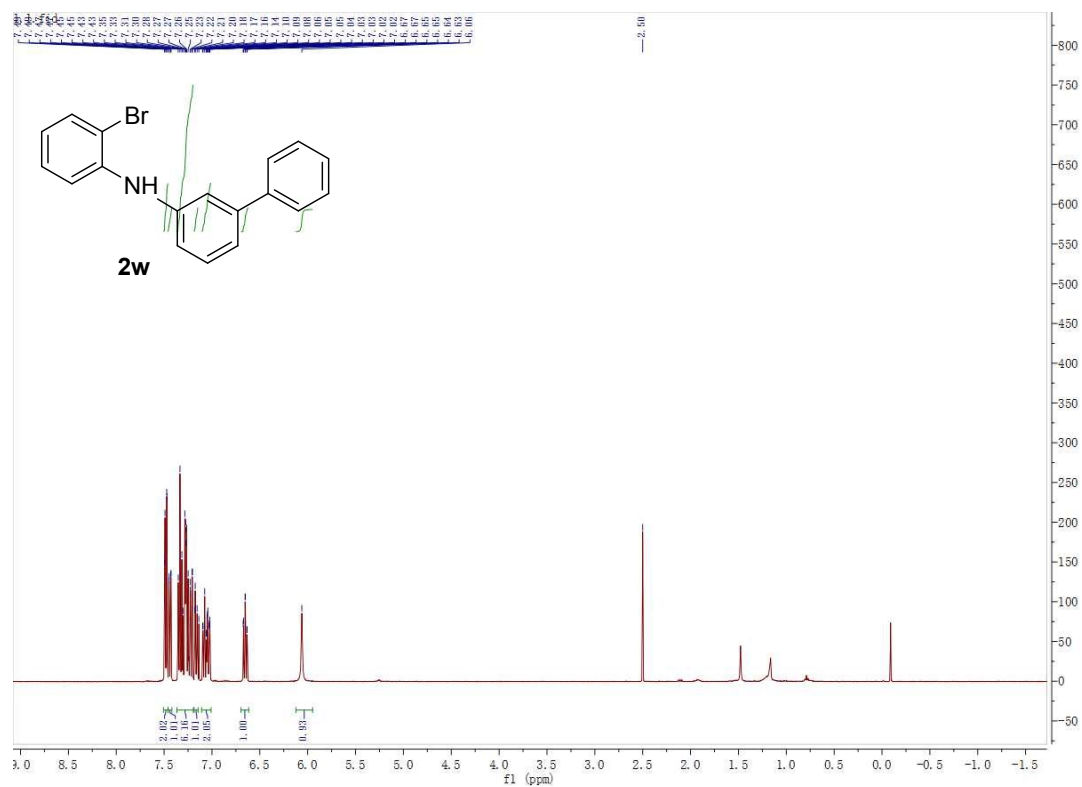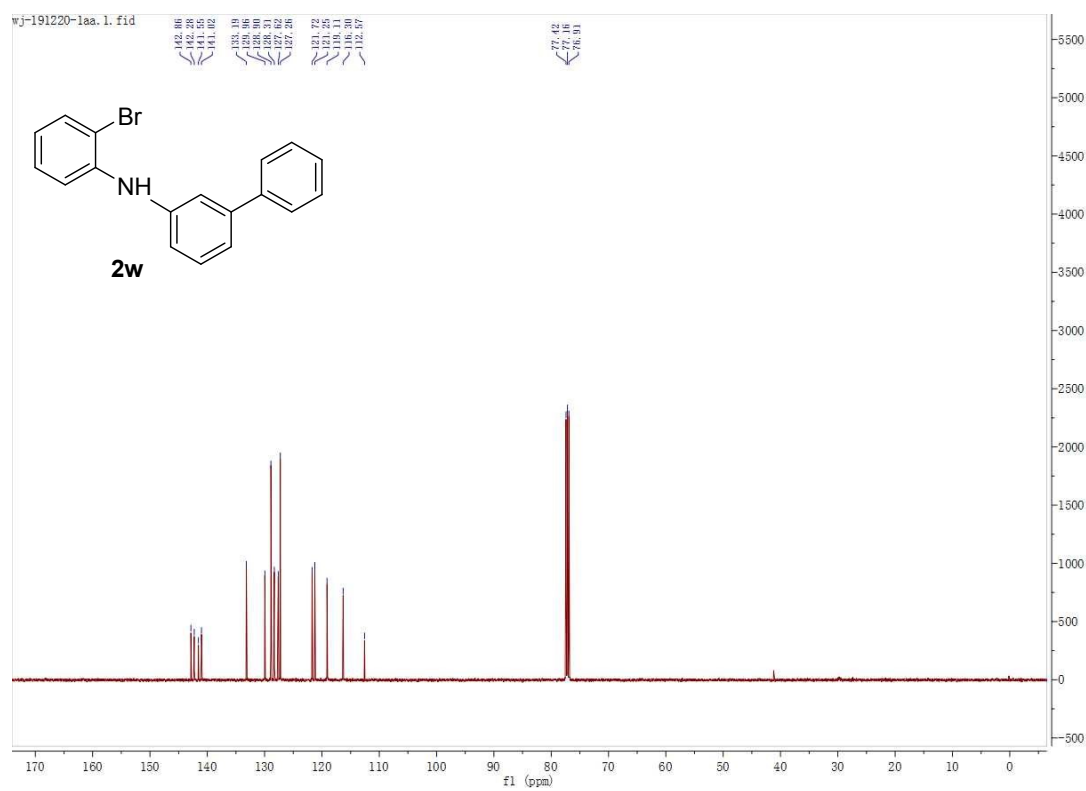

compound **3a**

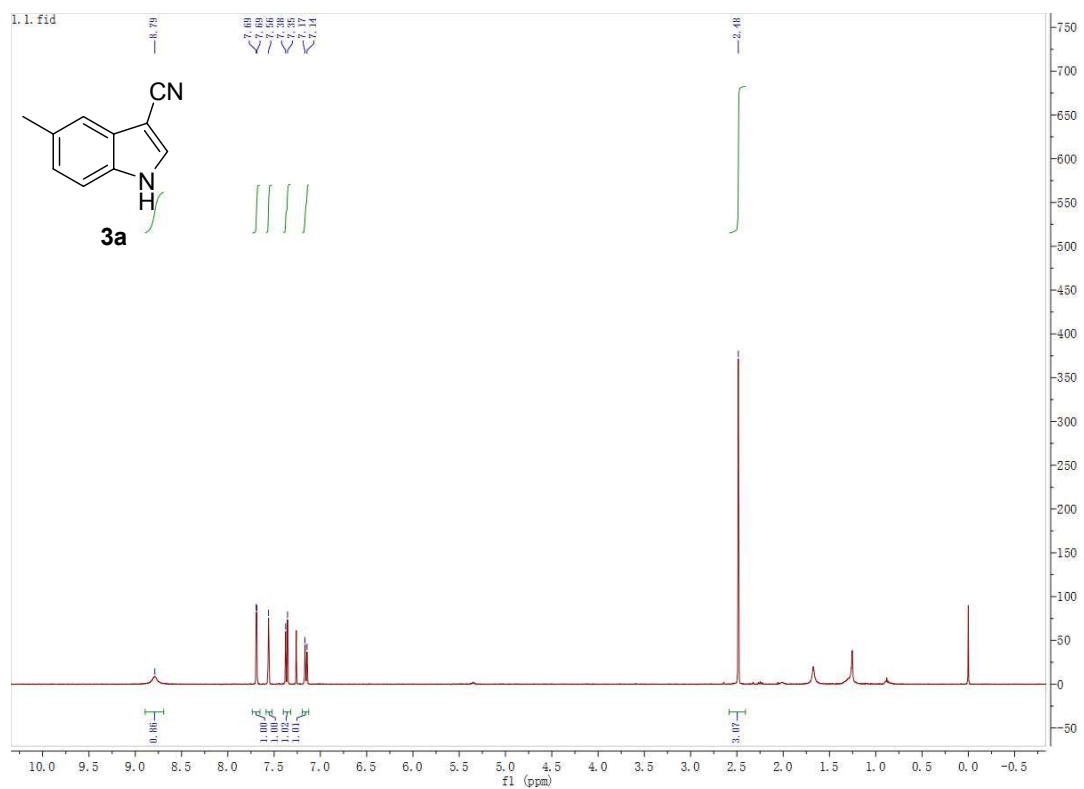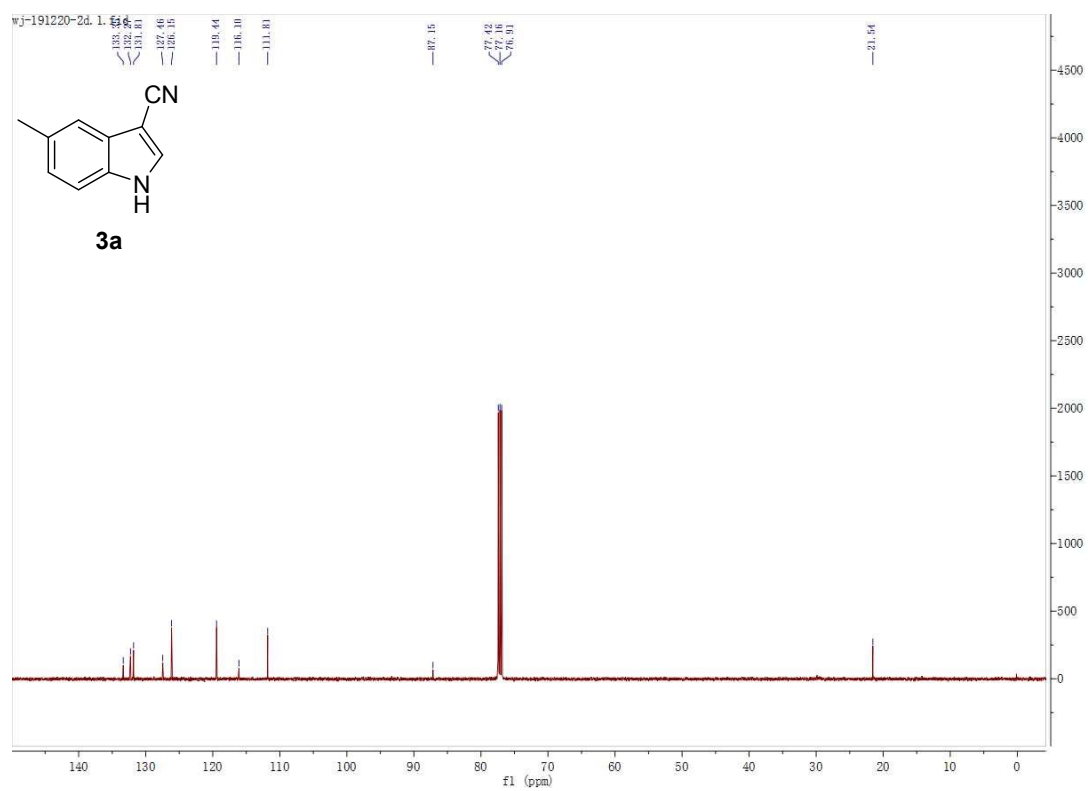

# compound **3b**

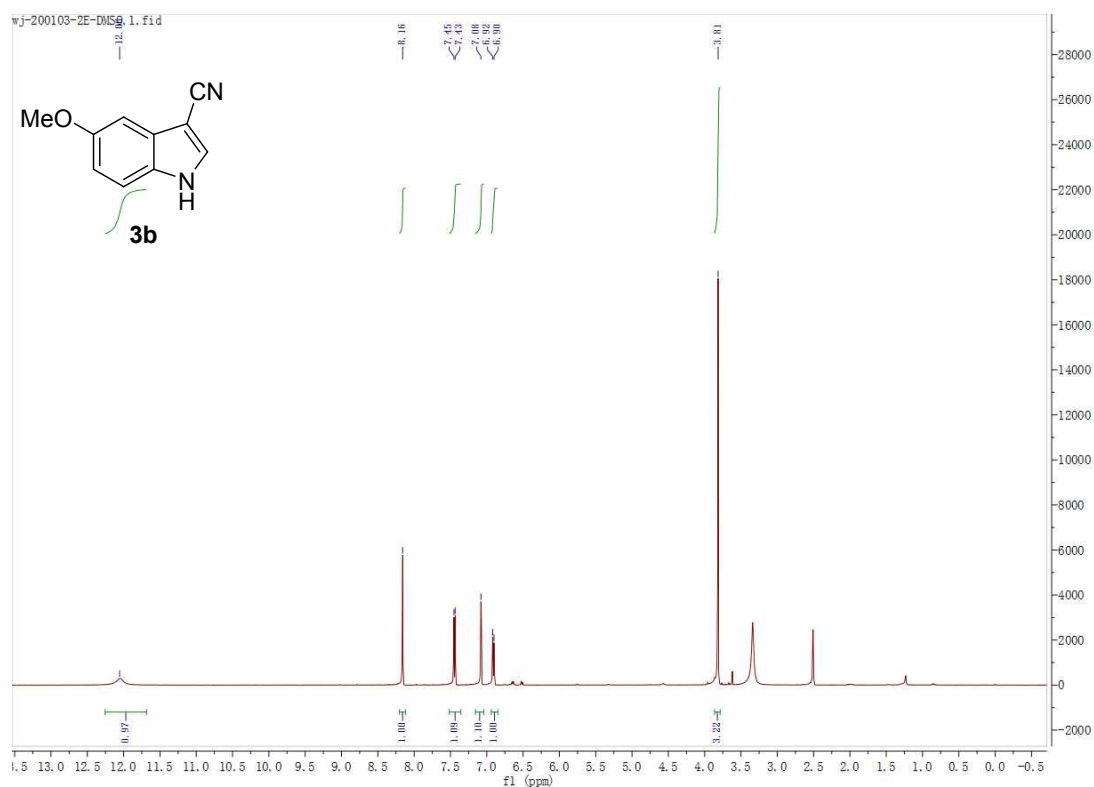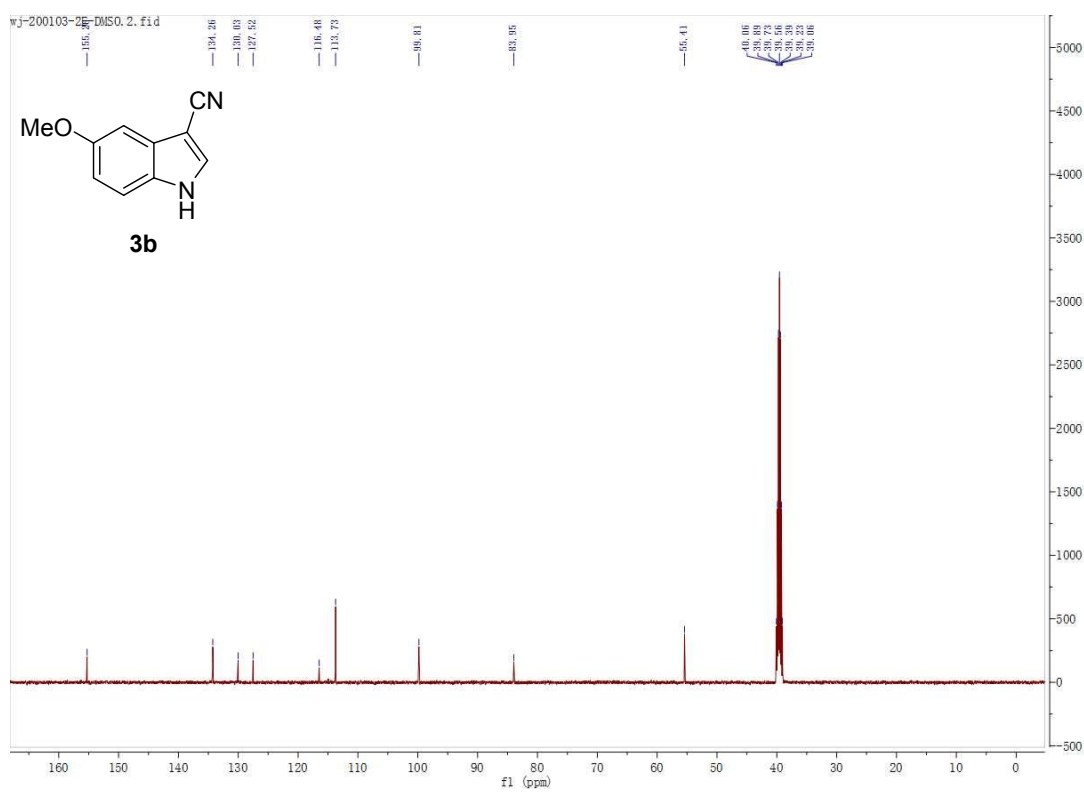

# compound **3c**

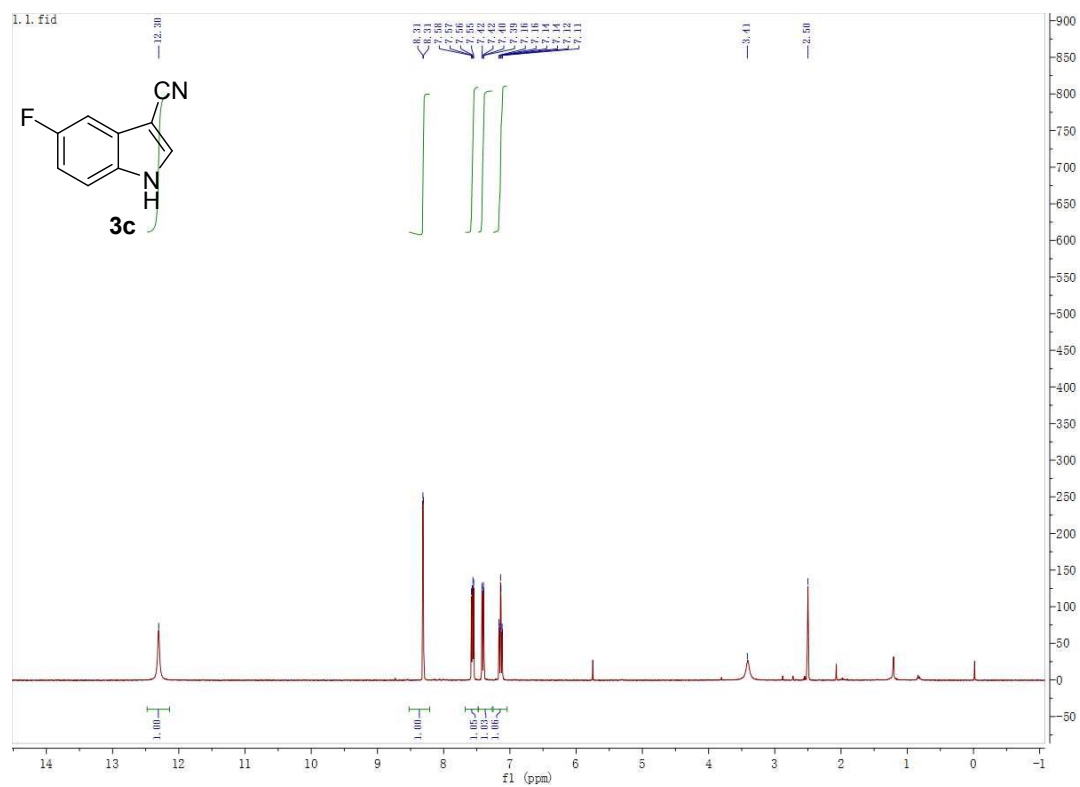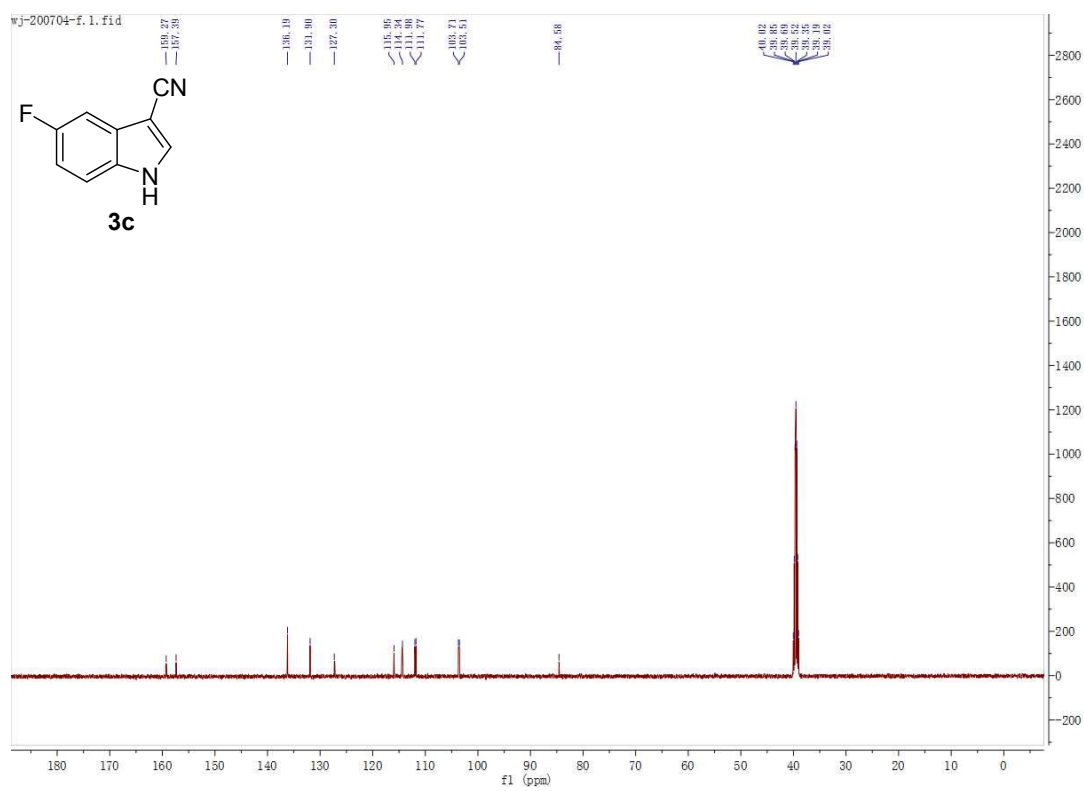

compound **3d**

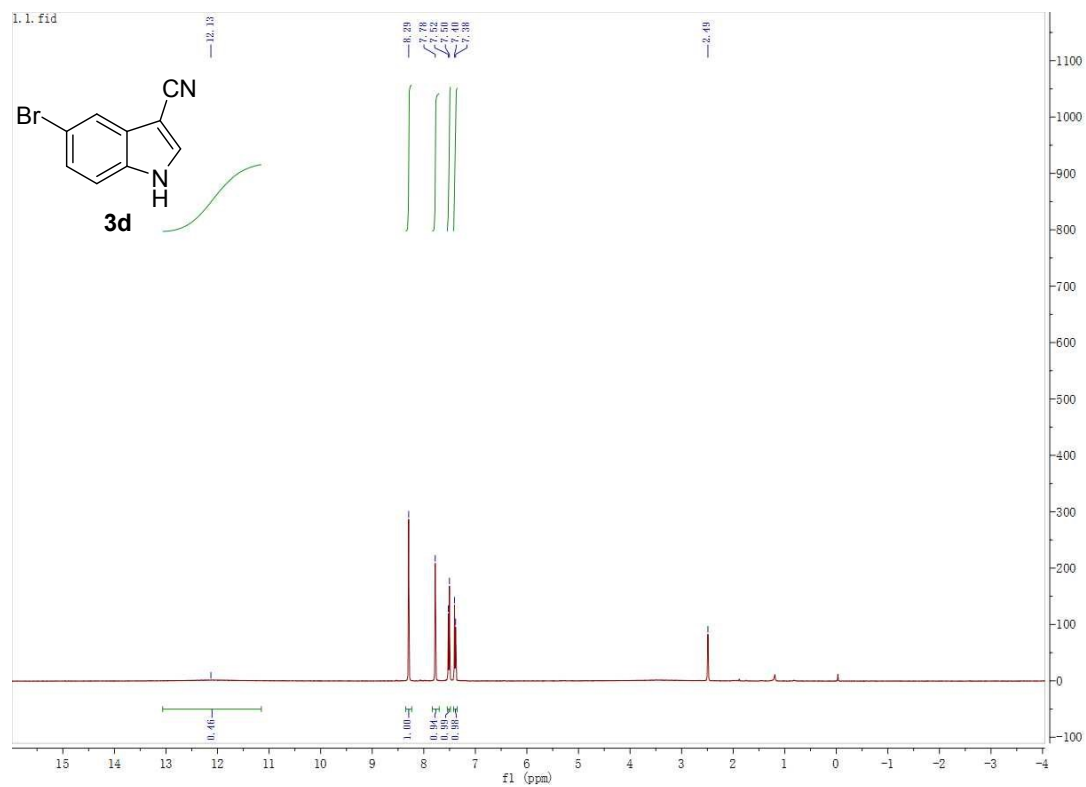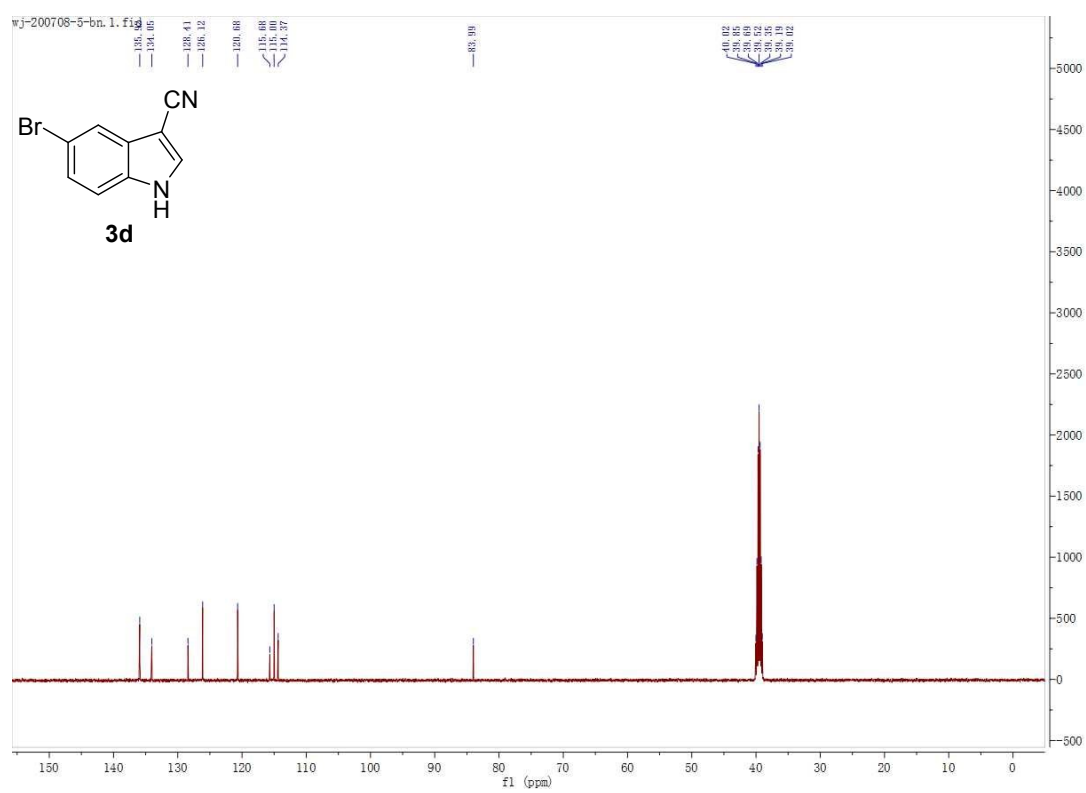

# compound **3e**

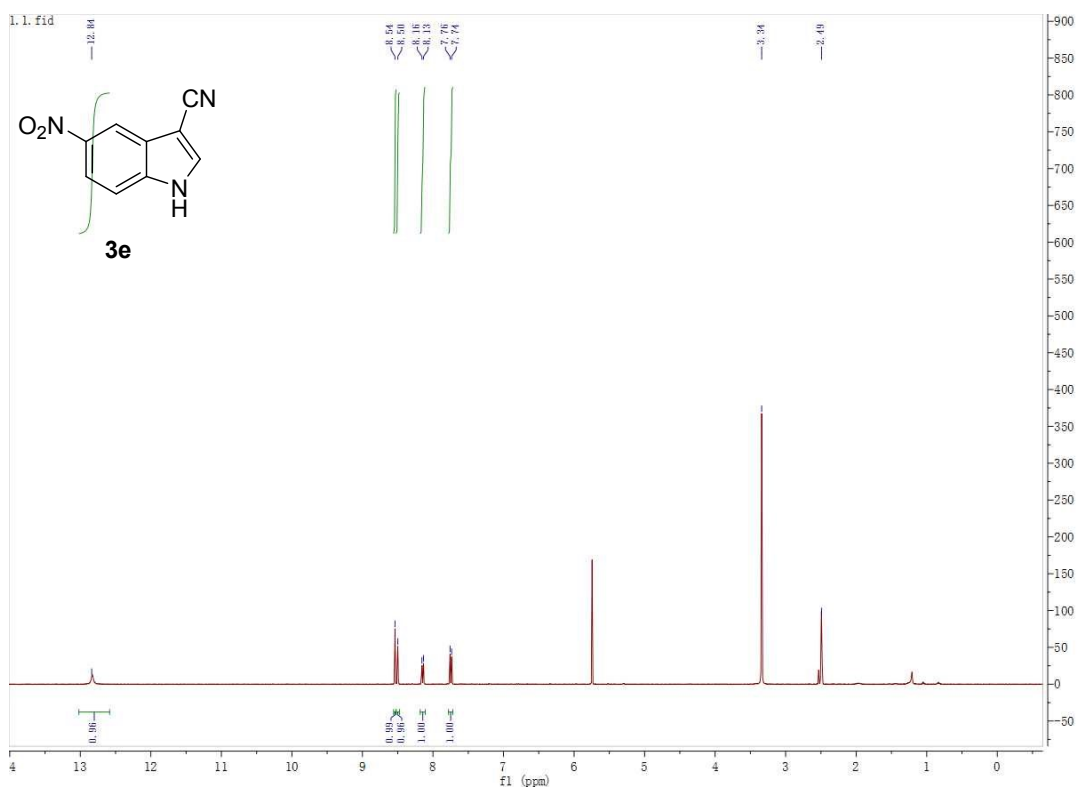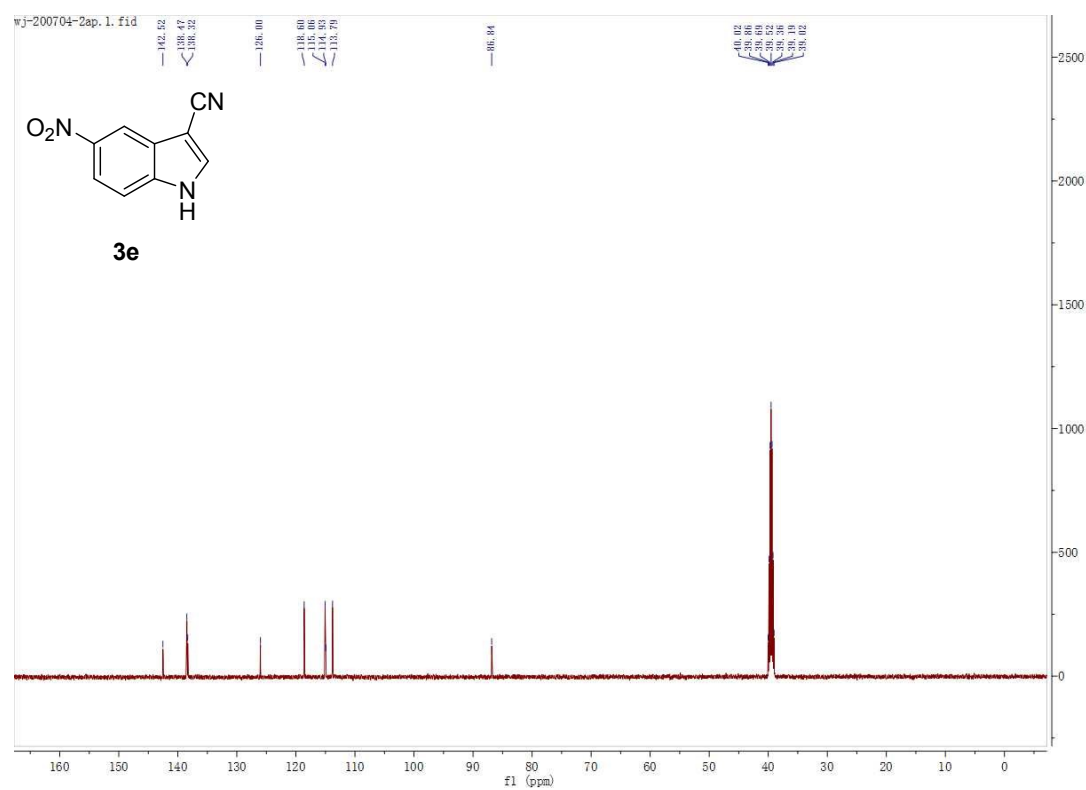

# compound **3f**

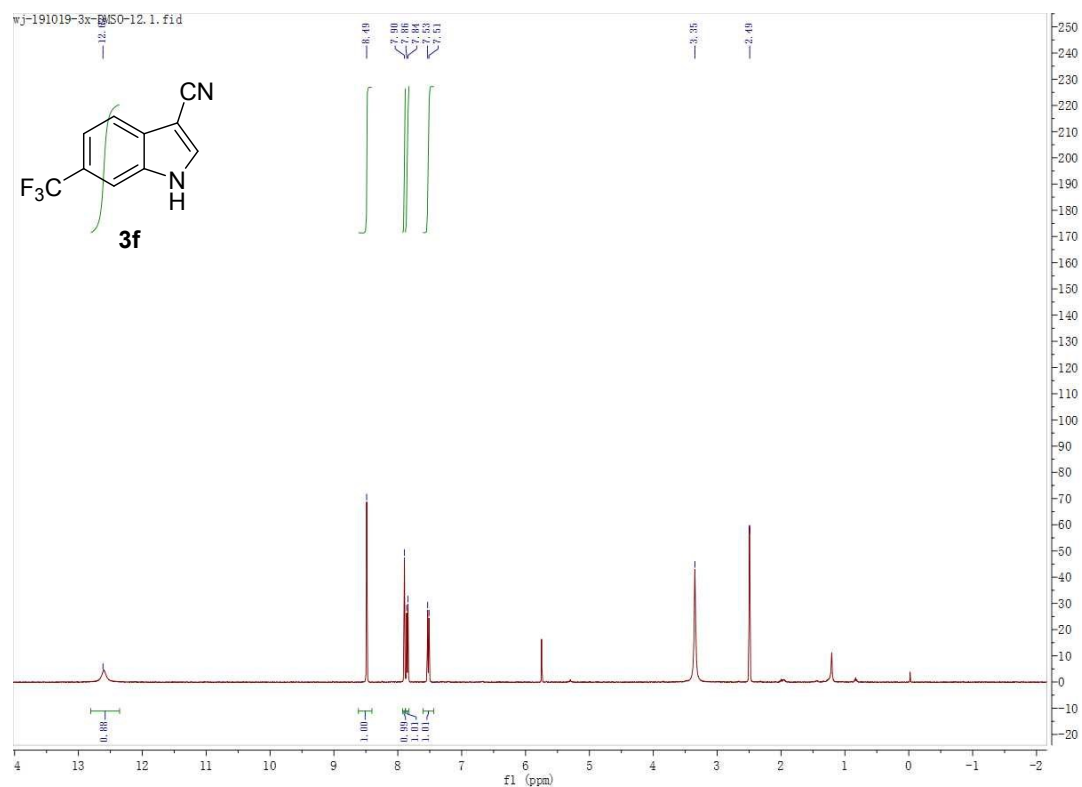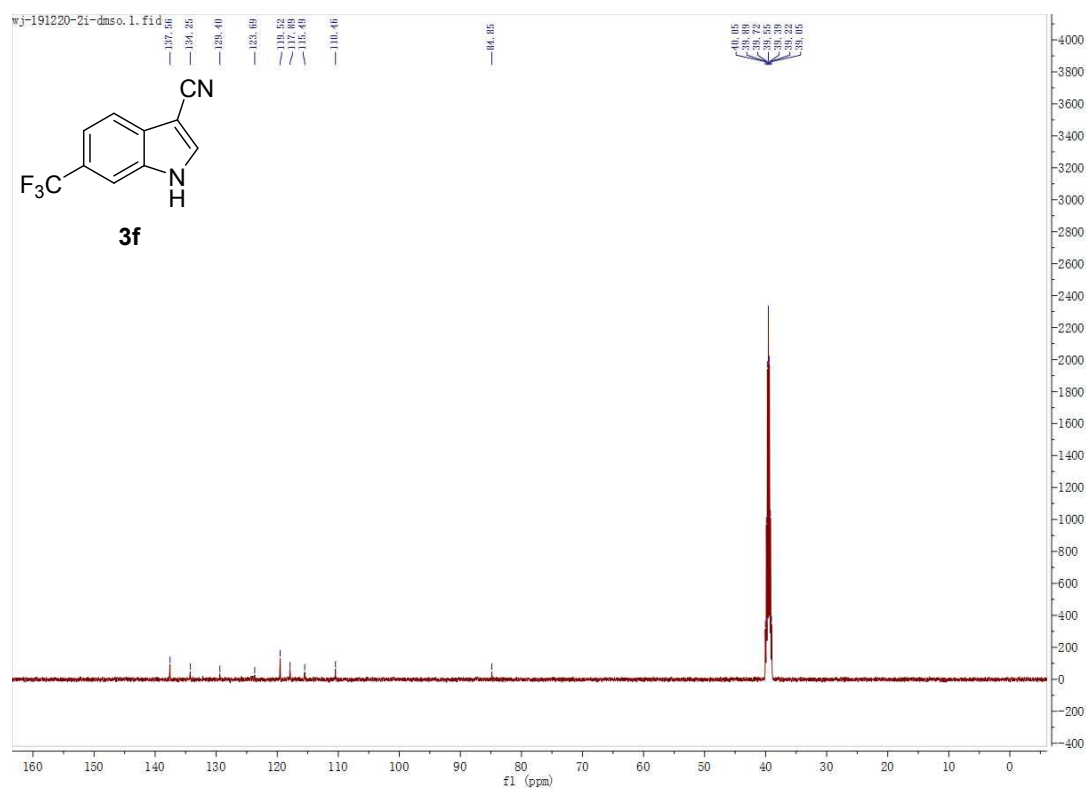

compound **3g**

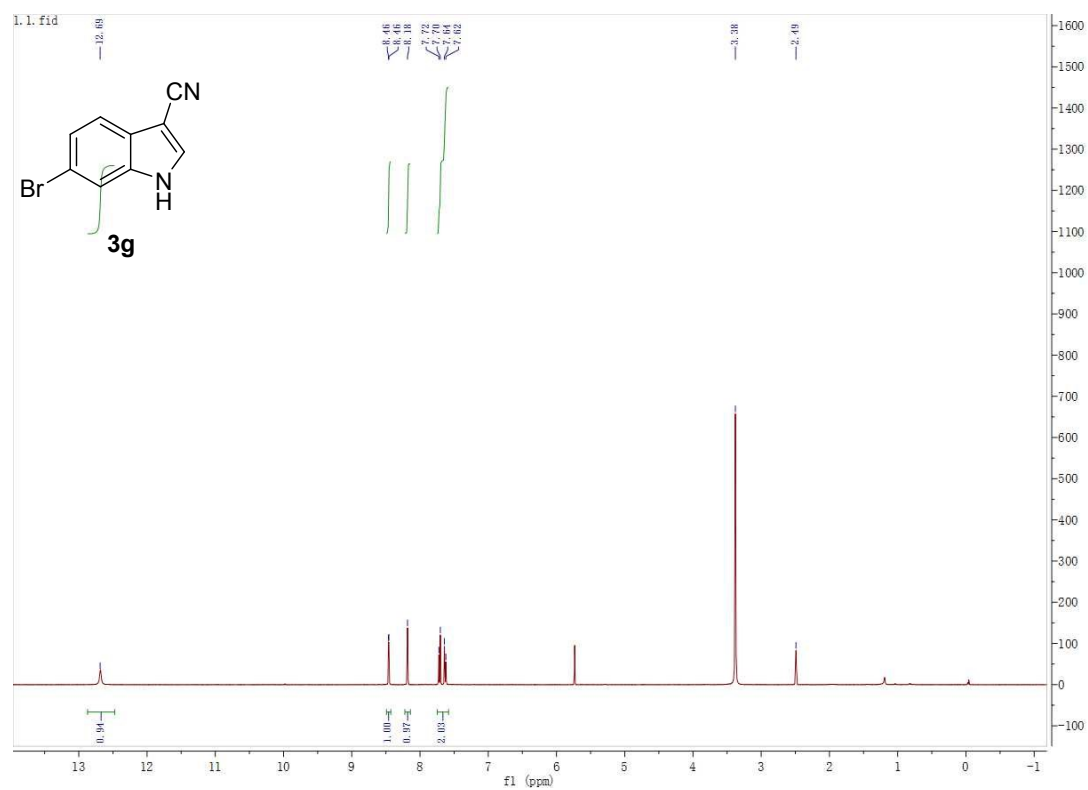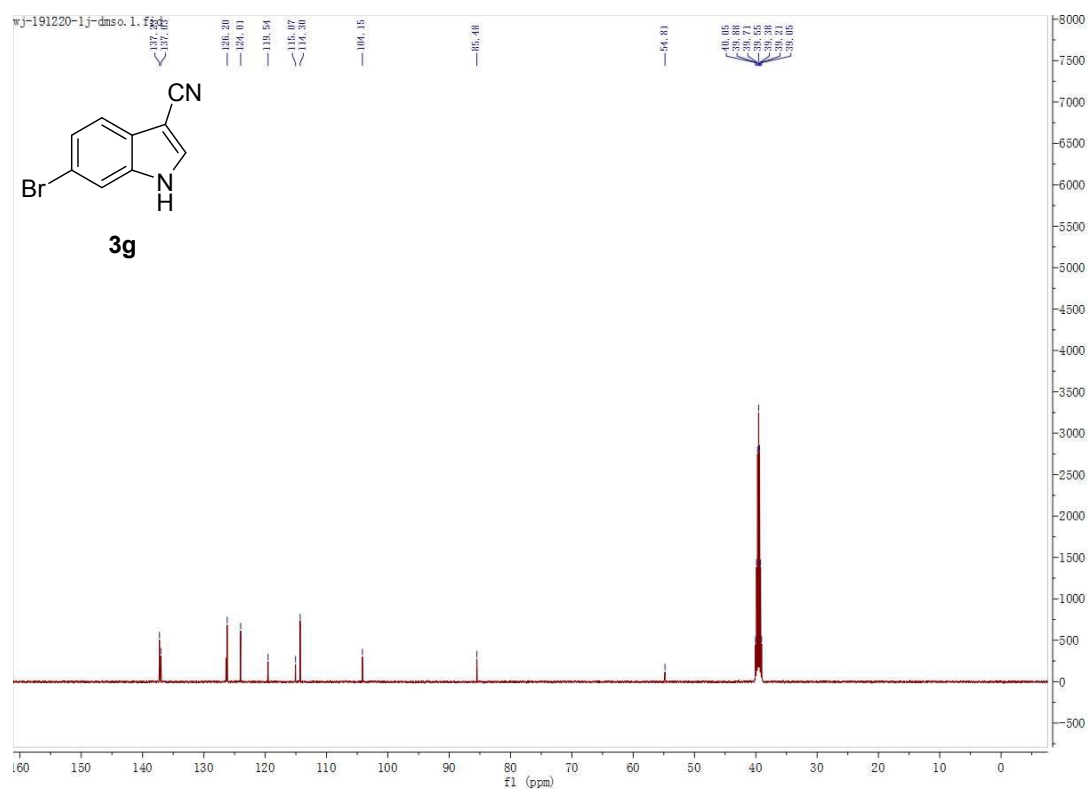

# compound **3h**

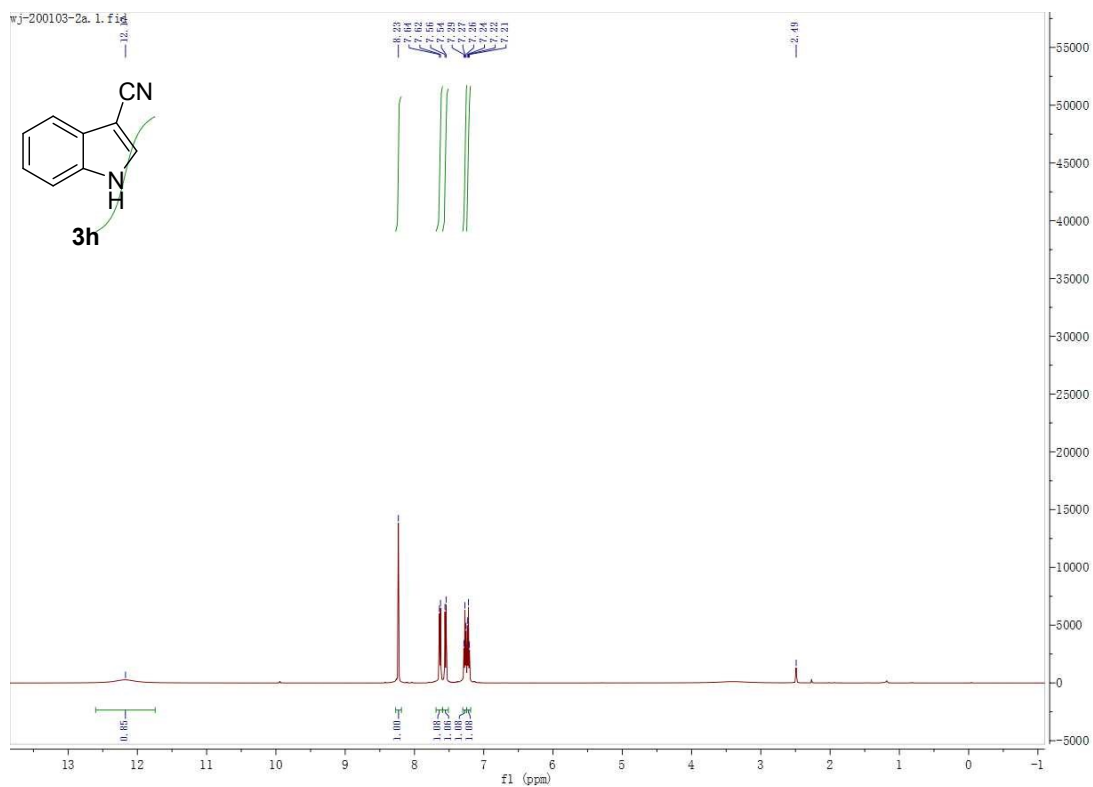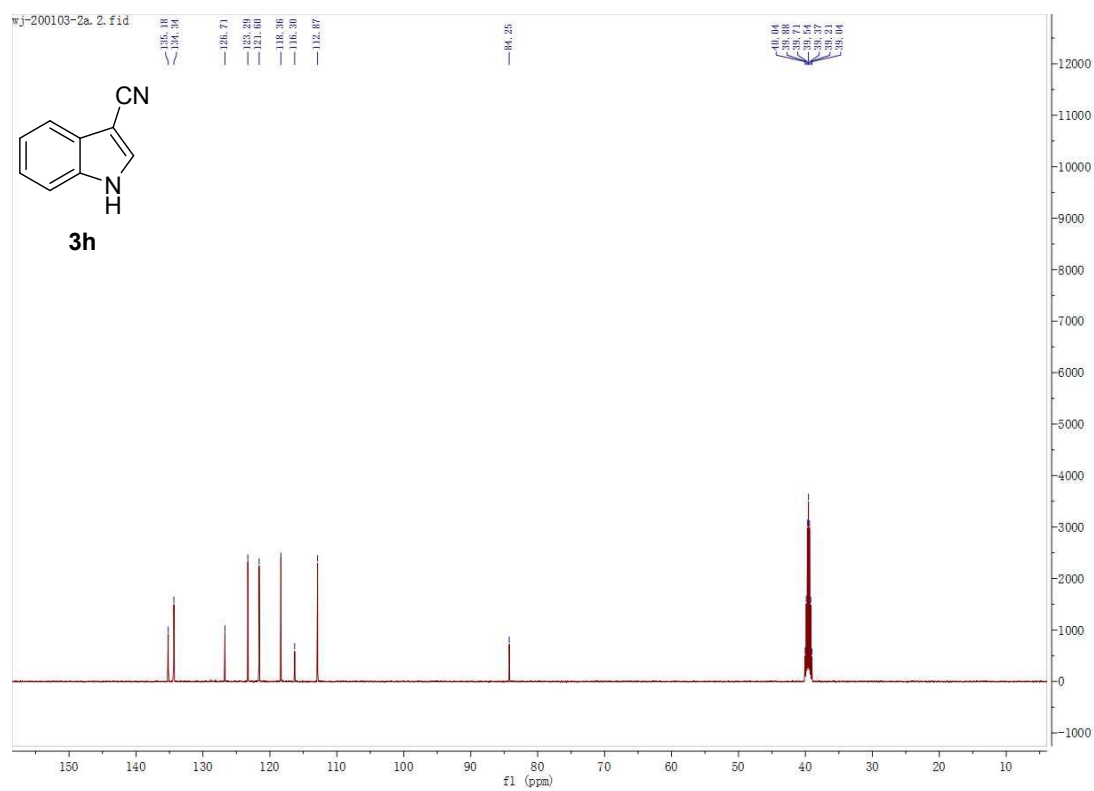

1. 1. f1d

7.75, 7.73, 7.53, 7.51, 7.49, 7.47, 7.45, 7.43, 7.41, 7.39, 7.37, 7.35, 7.33, 7.31, 7.29, 7.27, 7.25

3.83

3i

Chemical structure of 1-methyl-2-cyano-1H-indole (3i): CN1C=C(C#N)C2=CC=CC=C12

Integration values: 1.00, 1.00, 3.02, 3.05

Peak list (ppm): 7.75, 7.73, 7.53, 7.51, 7.49, 7.47, 7.45, 7.43, 7.41, 7.39, 7.37, 7.35, 7.33, 7.31, 7.29, 7.27, 7.25, 3.83

Integration table:

| Peak (ppm) | Integration |
|------------|-------------|
| 7.75       | 1.00        |
| 7.73       | 1.00        |
| 7.53       | 3.02        |
| 7.51       | 3.02        |
| 7.49       | 3.02        |
| 7.47       | 3.02        |
| 7.45       | 3.02        |
| 7.43       | 3.02        |
| 7.41       | 3.02        |
| 7.39       | 3.02        |
| 7.37       | 3.02        |
| 7.35       | 3.02        |
| 7.33       | 3.02        |
| 7.31       | 3.02        |
| 7.29       | 3.02        |
| 7.27       | 3.02        |
| 7.25       | 3.02        |
| 3.83       | 3.05        |

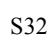

wj190727-2d.1.F1d

Chemical structure of compound 3j is shown. The structure is 2-ethyl-1H-indole-3-carbonitrile. The <sup>1</sup>H NMR spectrum (400 MHz, CDCl<sub>3</sub>) is displayed below the structure. The spectrum shows peaks in the aromatic region (7.0-7.8 ppm) and aliphatic region (1.0-2.0 ppm). Integration values are provided for each peak.

**3j**

<sup>1</sup>H NMR spectrum (400 MHz, CDCl<sub>3</sub>) of compound 3j. The x-axis represents the chemical shift in ppm (f1), ranging from 9.0 to -1.5. The y-axis represents the intensity, ranging from -1000 to 17000. The spectrum shows several peaks, with integration values provided for each peak.

Integration values (from left to right): 0.91, 0.95, 1.00, 0.90, 2.04, 2.03, 2.26, 3.00.

Chemical shift (ppm) ranges: 7.8-7.9, 7.5-7.6, 7.2-7.3, 4.1-4.2, 1.9-2.0, 1.5-1.6, 1.0-1.1.

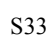

compound

3k

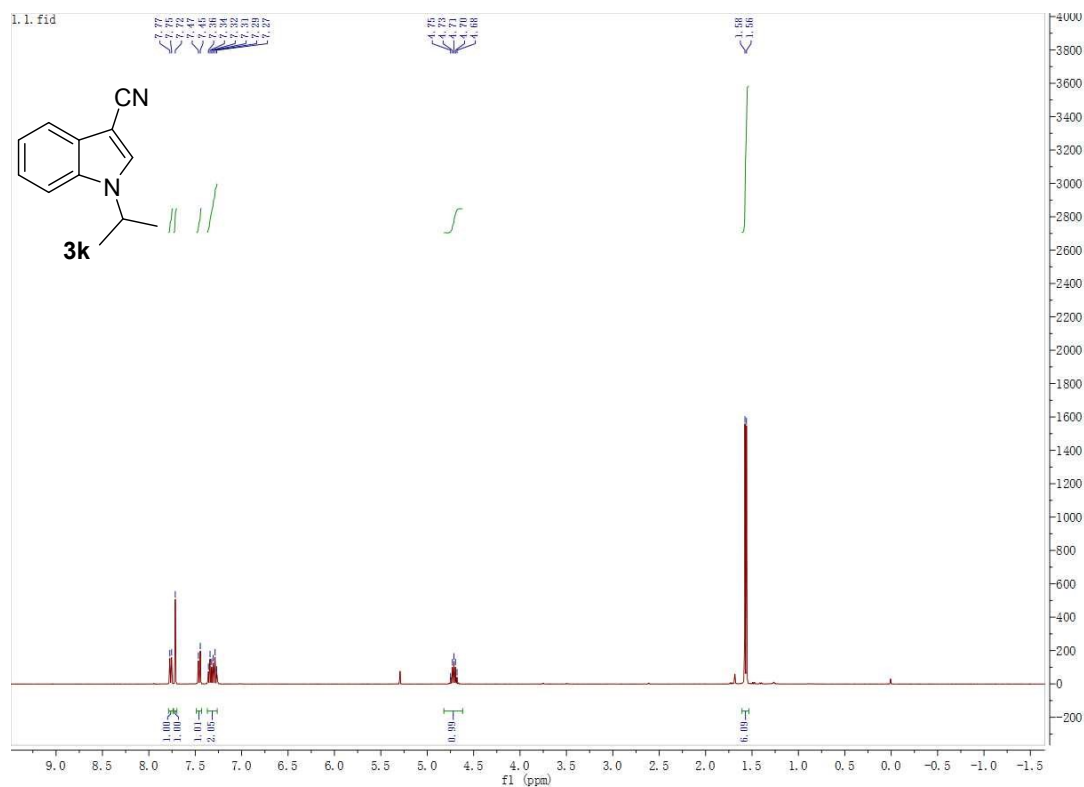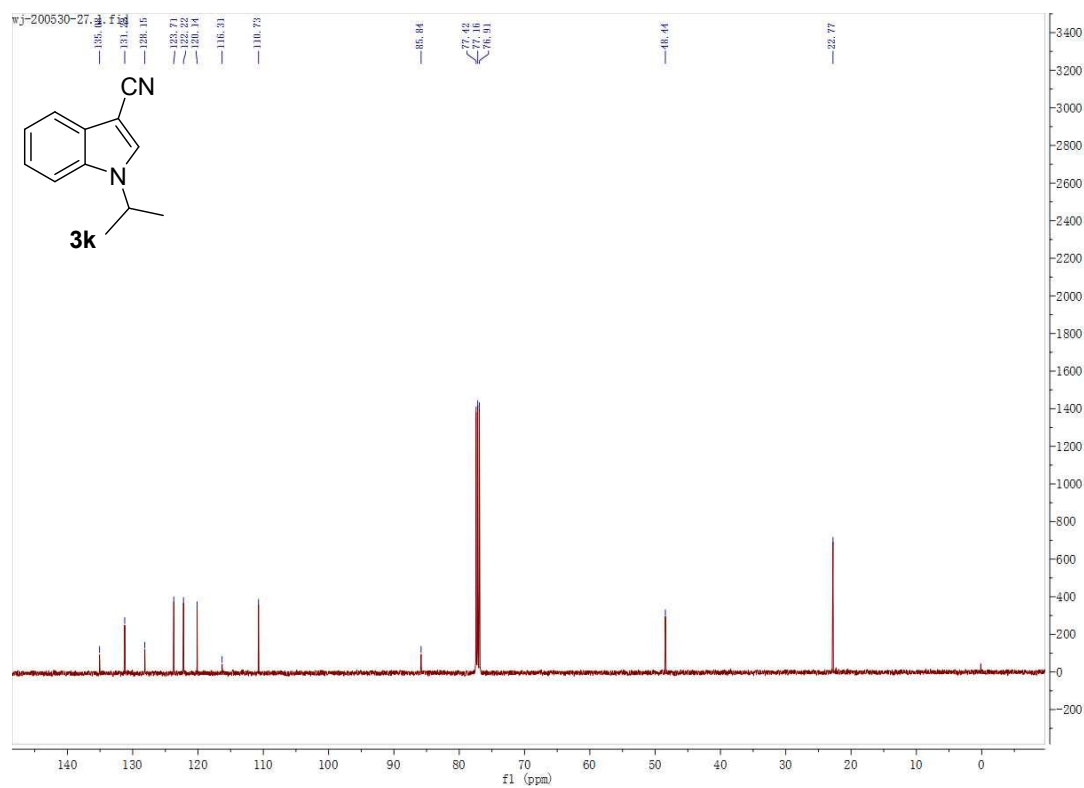

compound **3l**

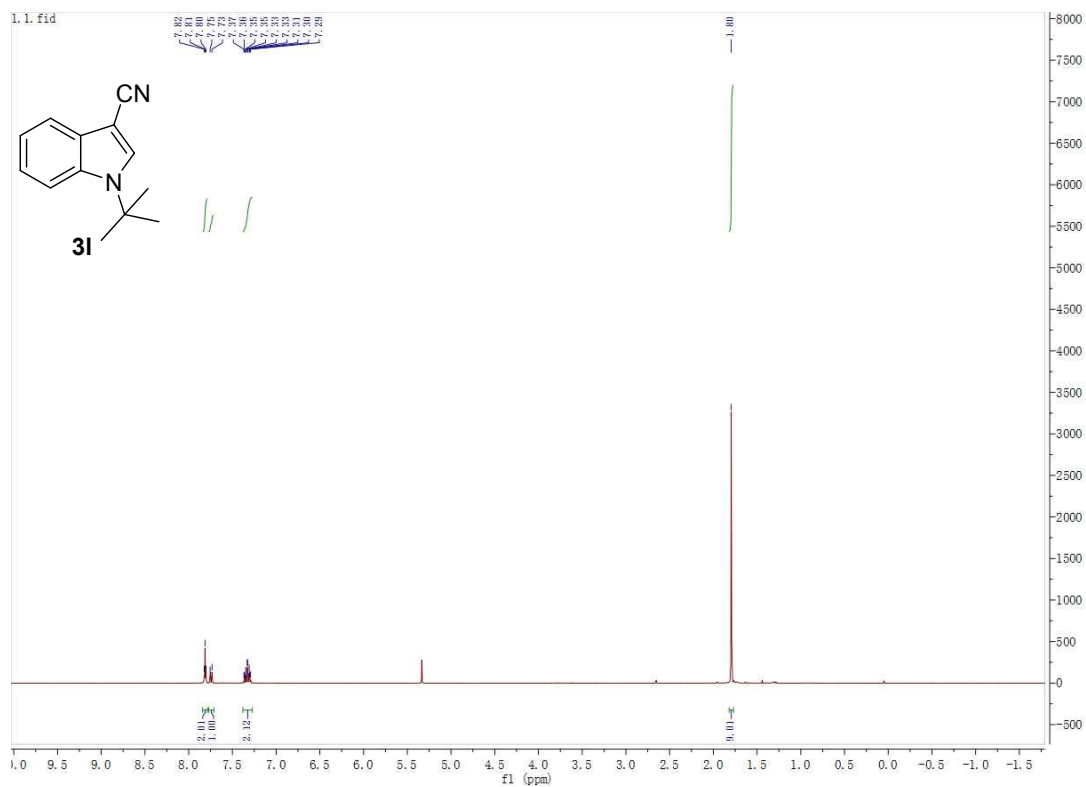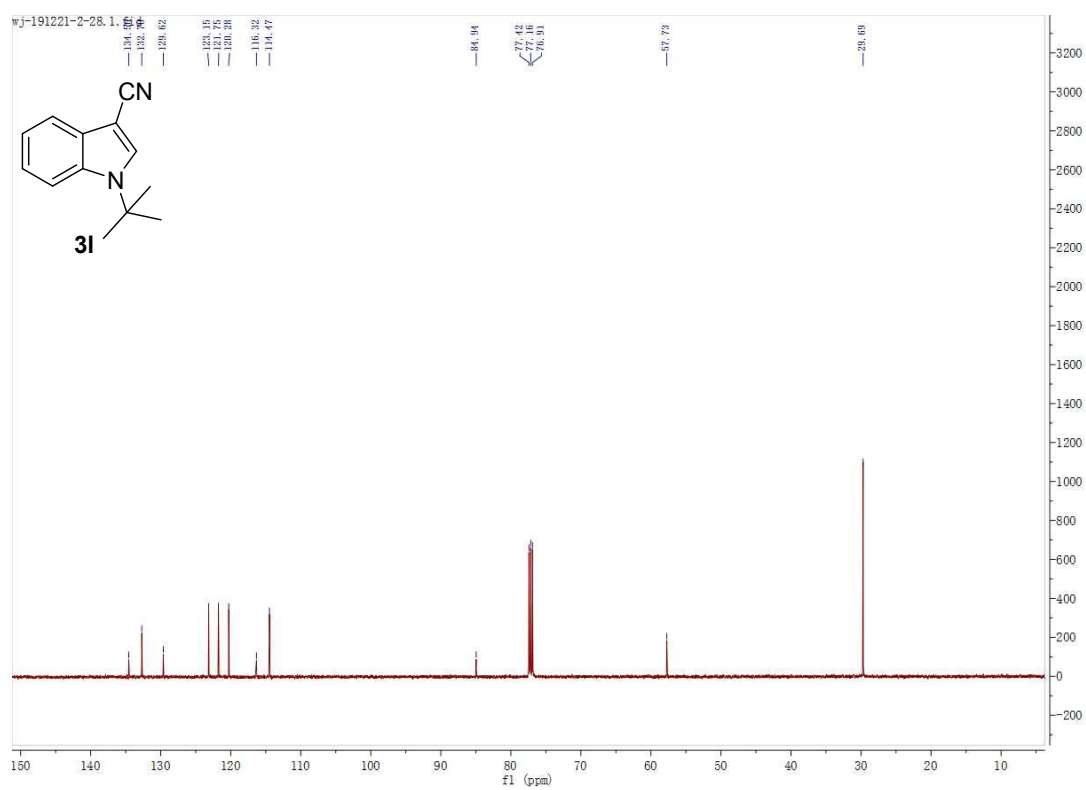

compound

3m

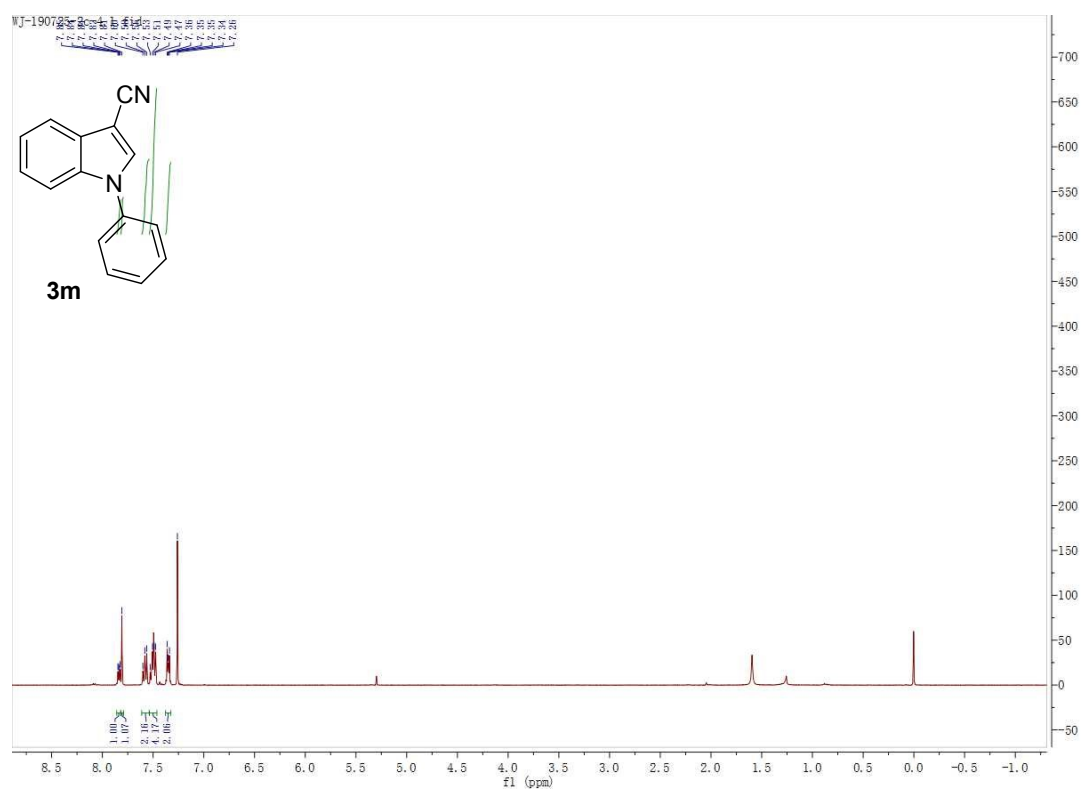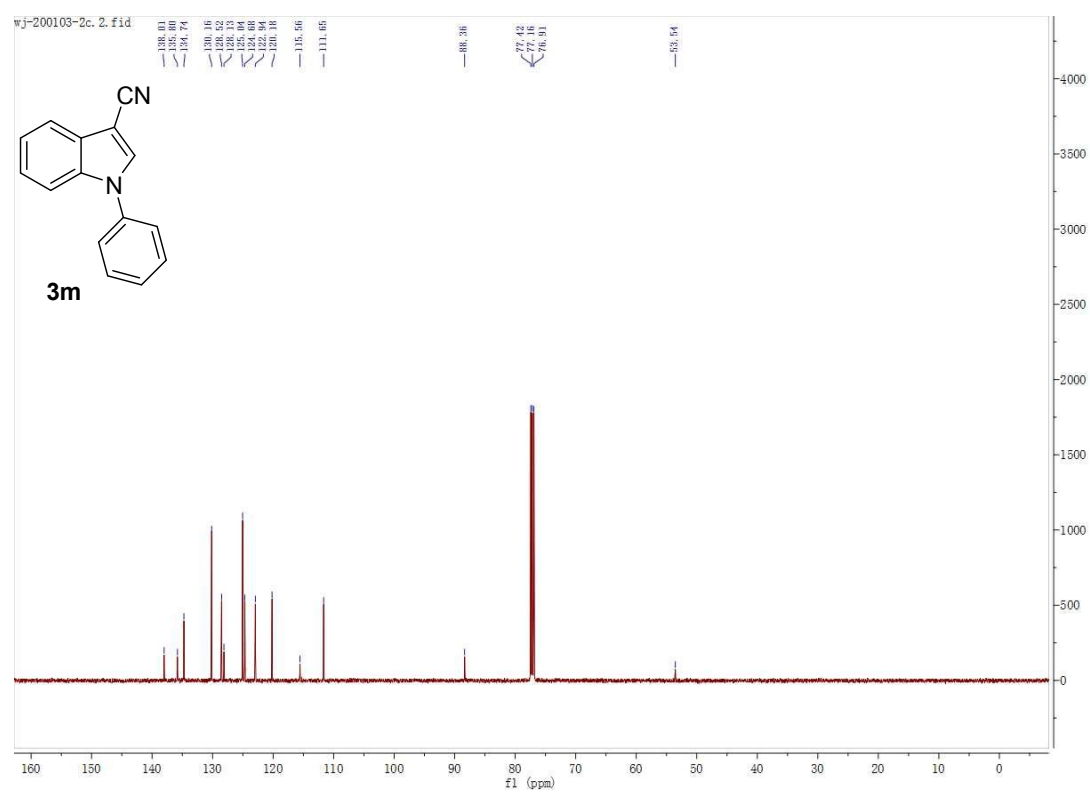

compound **3n**

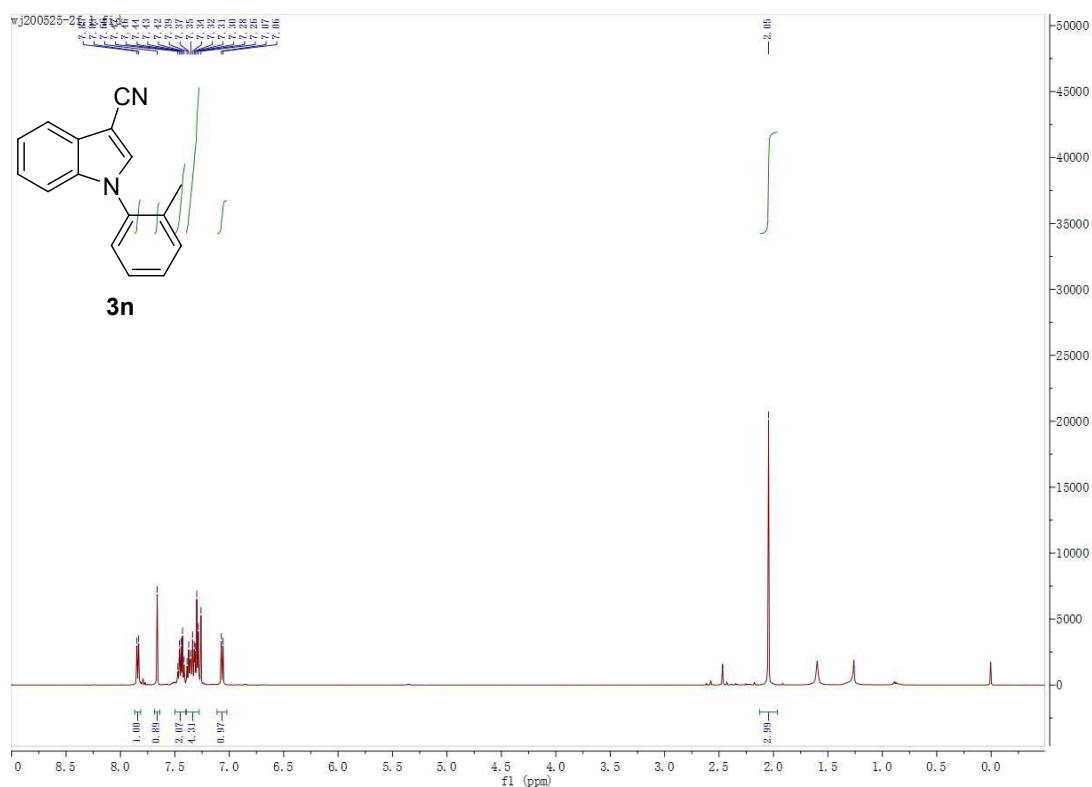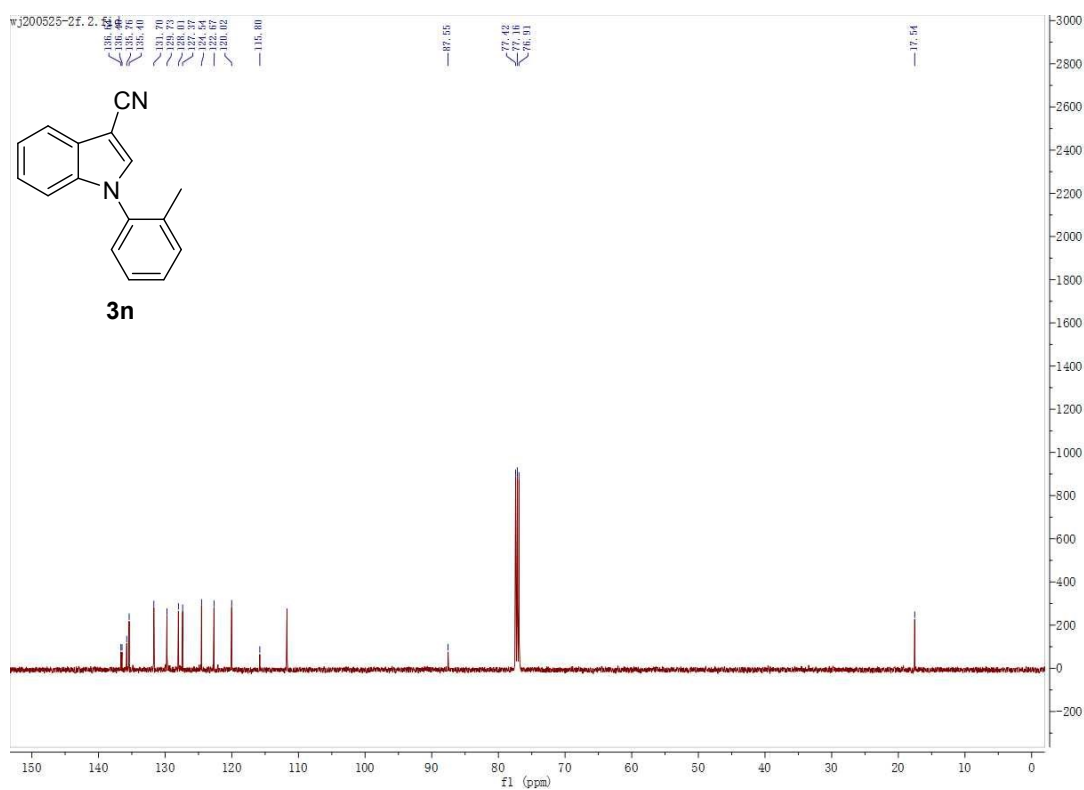

compound **3o**

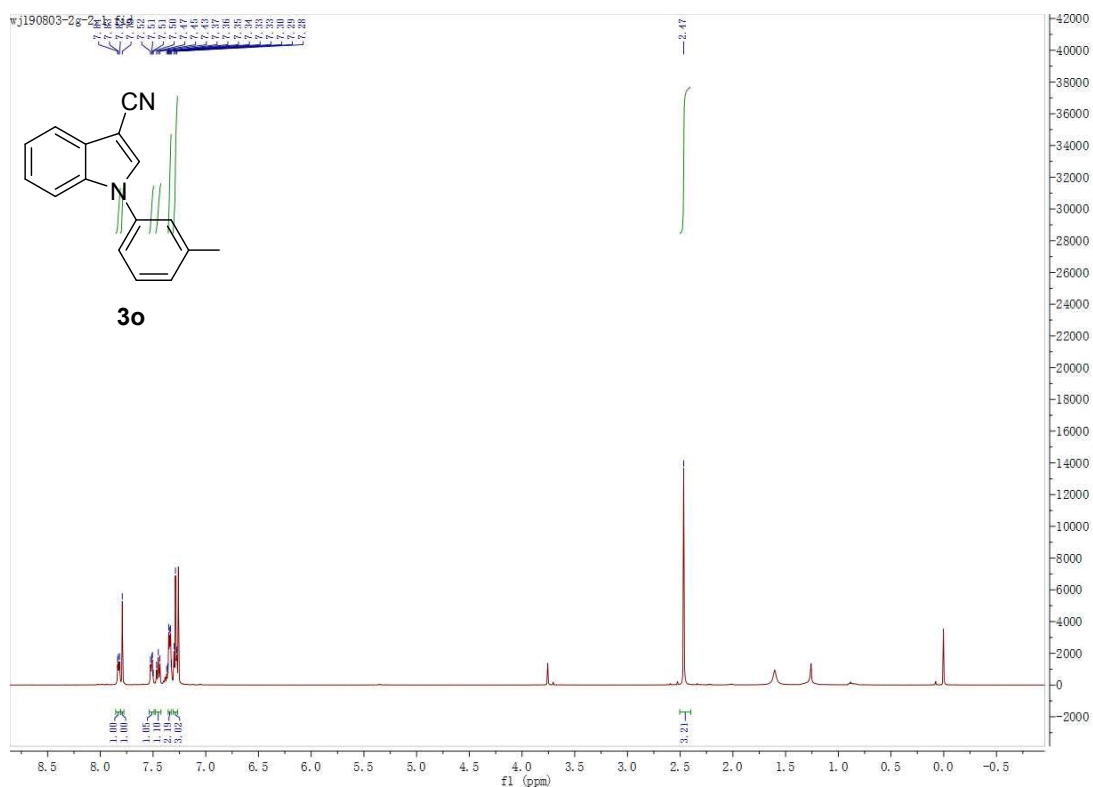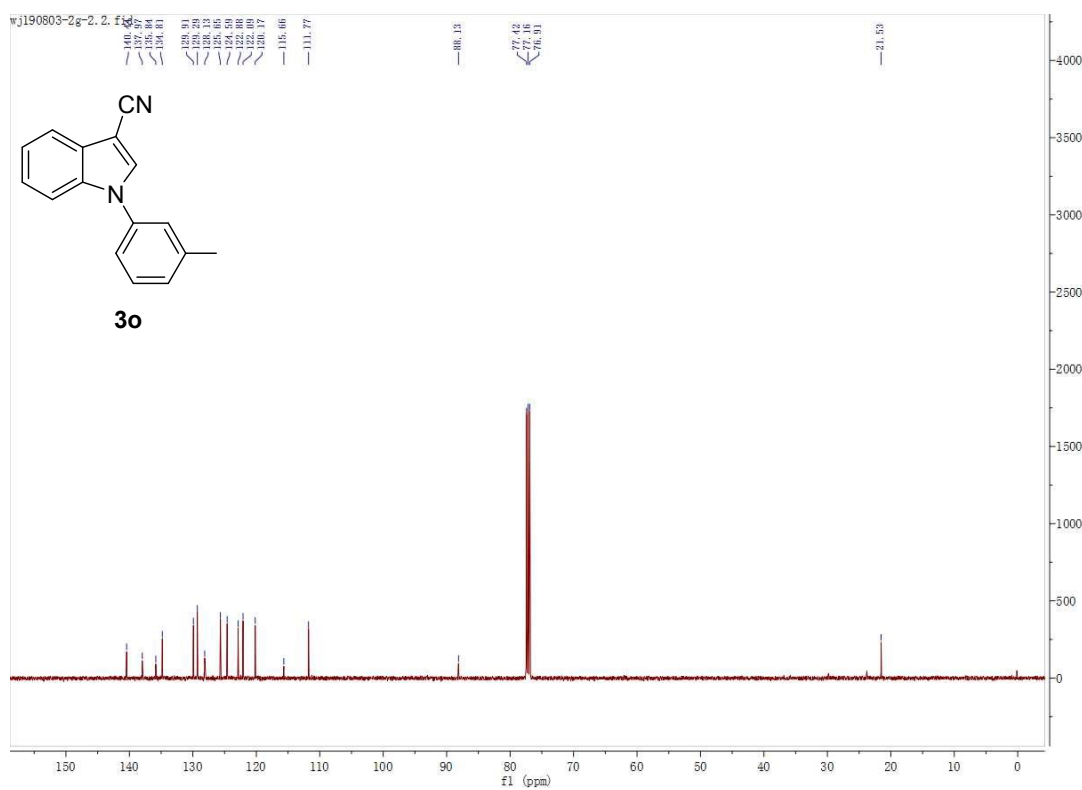

1. 1. f1d

**3p**

Chemical structure of **3p** (1-(4-pentylphenyl)-2-cyano-1H-indole) is shown above the spectrum.

The spectrum displays peaks corresponding to the structure, with integration values provided below the baseline and peak lists at the top.

Integration values (from left to right): 0.98, 0.98, 1.00, 5.92, 1.99, 2.00, 2.11, 2.11, 3.03.

Peak lists (from left to right):

- 7.83, 7.81, 7.80, 7.51, 7.49, 7.37, 7.36, 7.35
- 2.73, 2.71, 2.70, 1.71, 1.69, 1.68, 1.65, 1.63, 1.61, 1.44, 1.42, 1.39, 1.37, 1.09, 1.07, 0.95

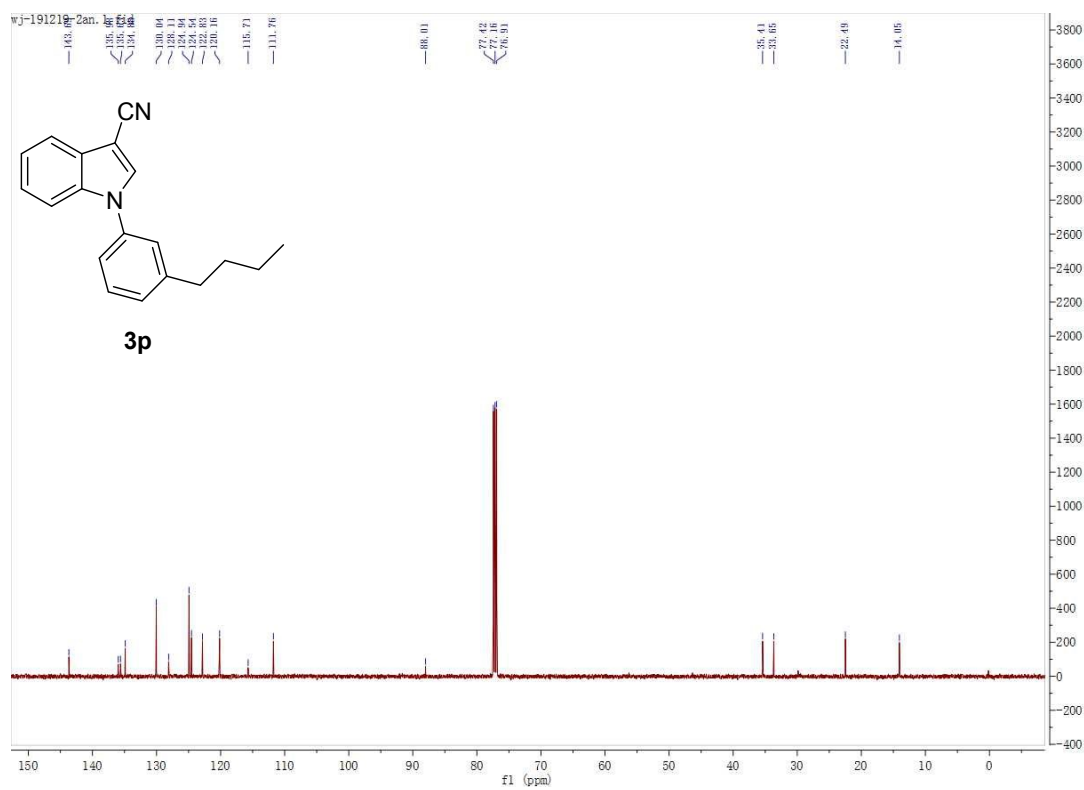

compound **3q**

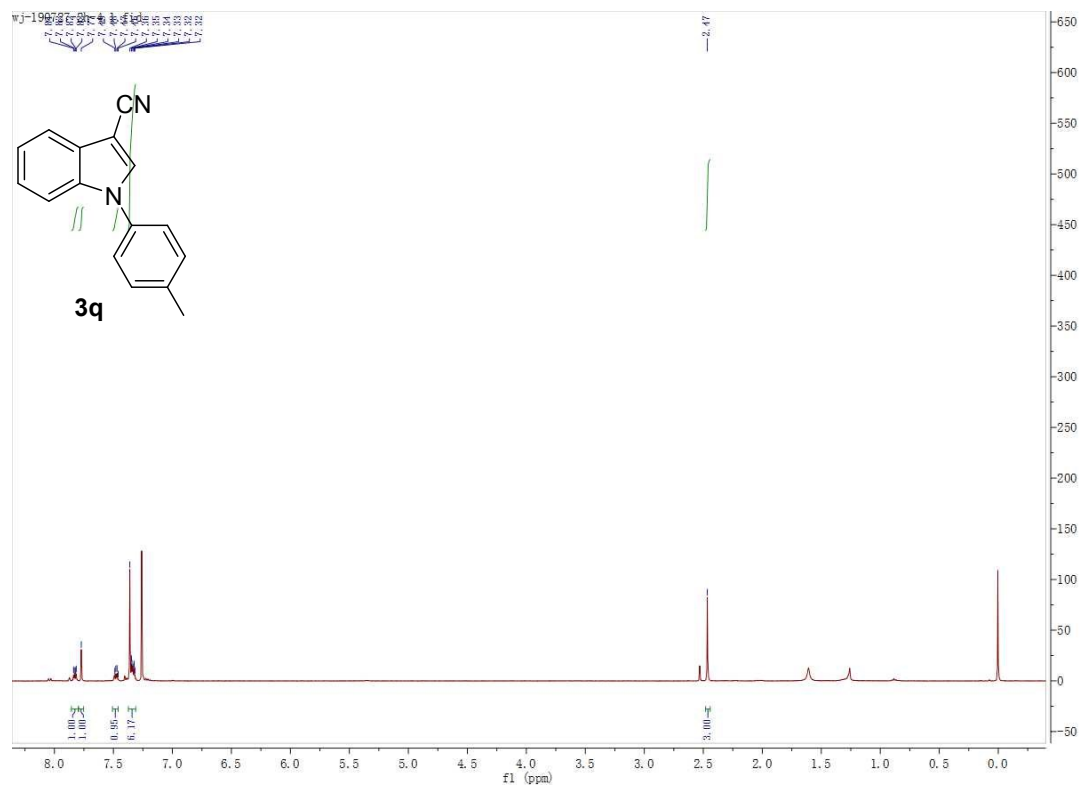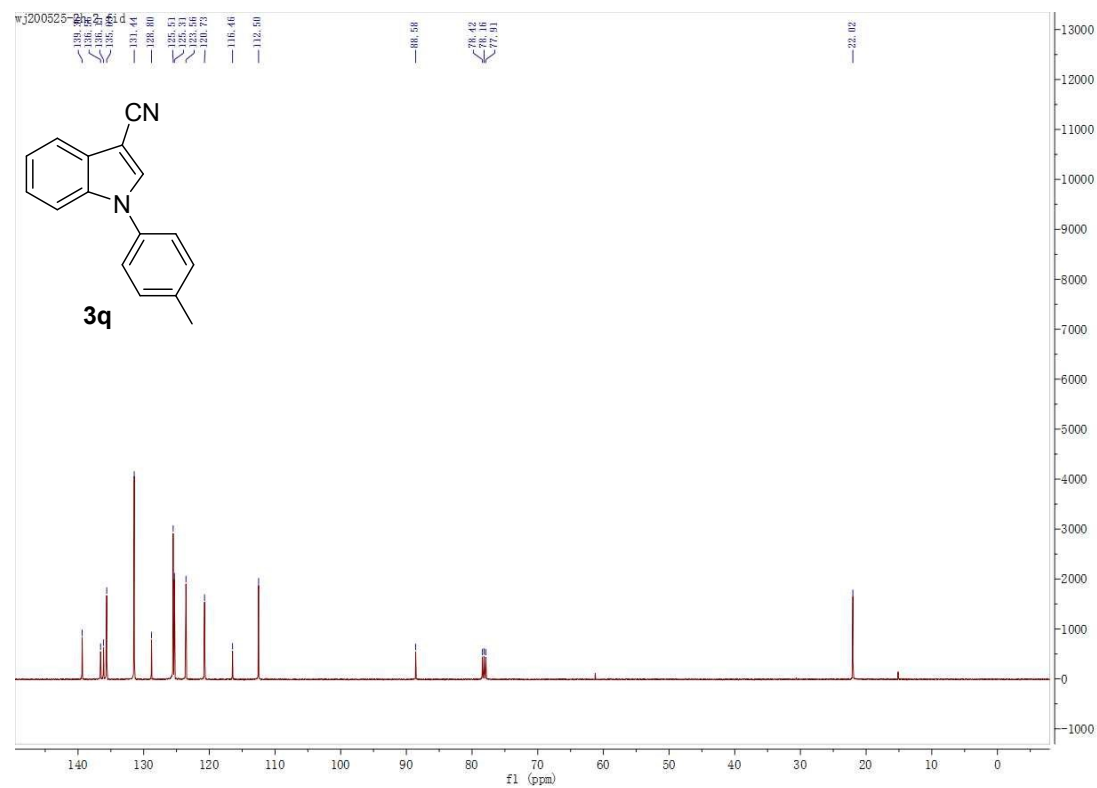

1. 1. f1d

Chemical structure of **3r** is shown as an inset. The structure is 2-(2-fluorophenyl)-1H-indole-3-carbonitrile. The spectrum shows peaks at 7.86, 7.84, 7.83, 7.82, 7.77, 7.75, 7.53, 7.51, 7.50, 7.48, 7.39, 7.38, 7.35, 7.33, 7.32, 7.31, 2.53, 2.52, 2.51, 2.50, 2.48, 2.39, 2.38, 2.35, 2.33, 2.32, 2.31 ppm. Integration values are 1.00, 0.99, 2.04, 5.10.

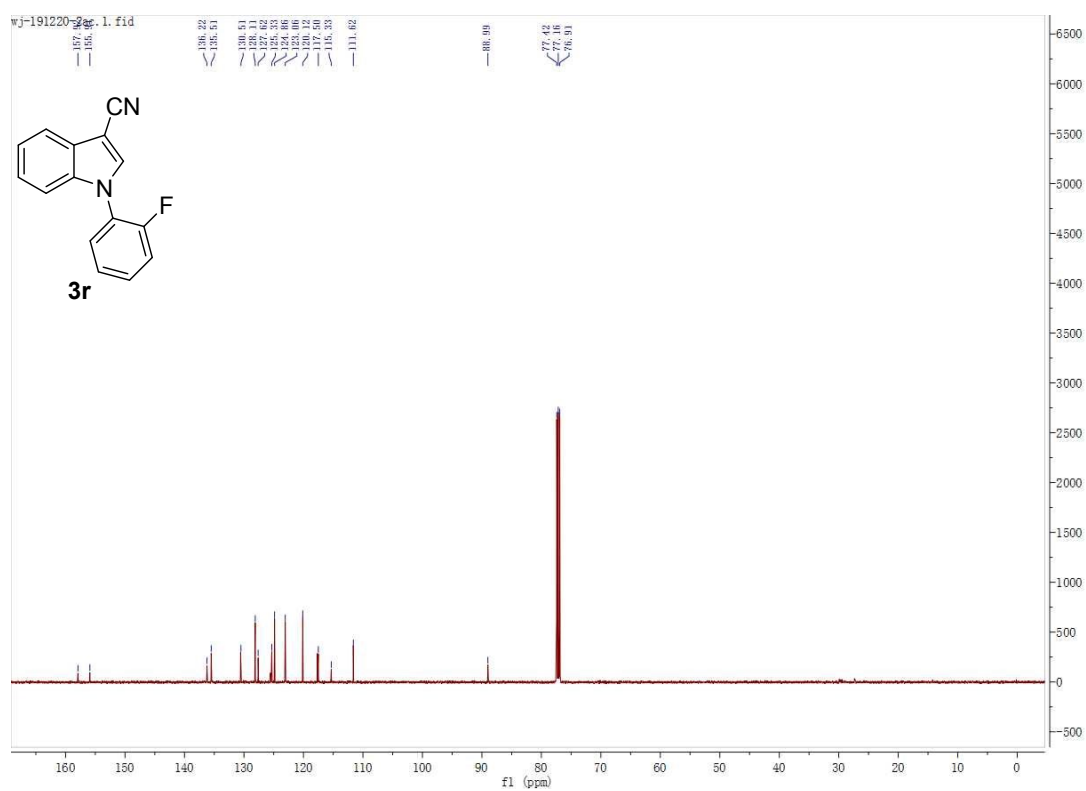

compound **3s**

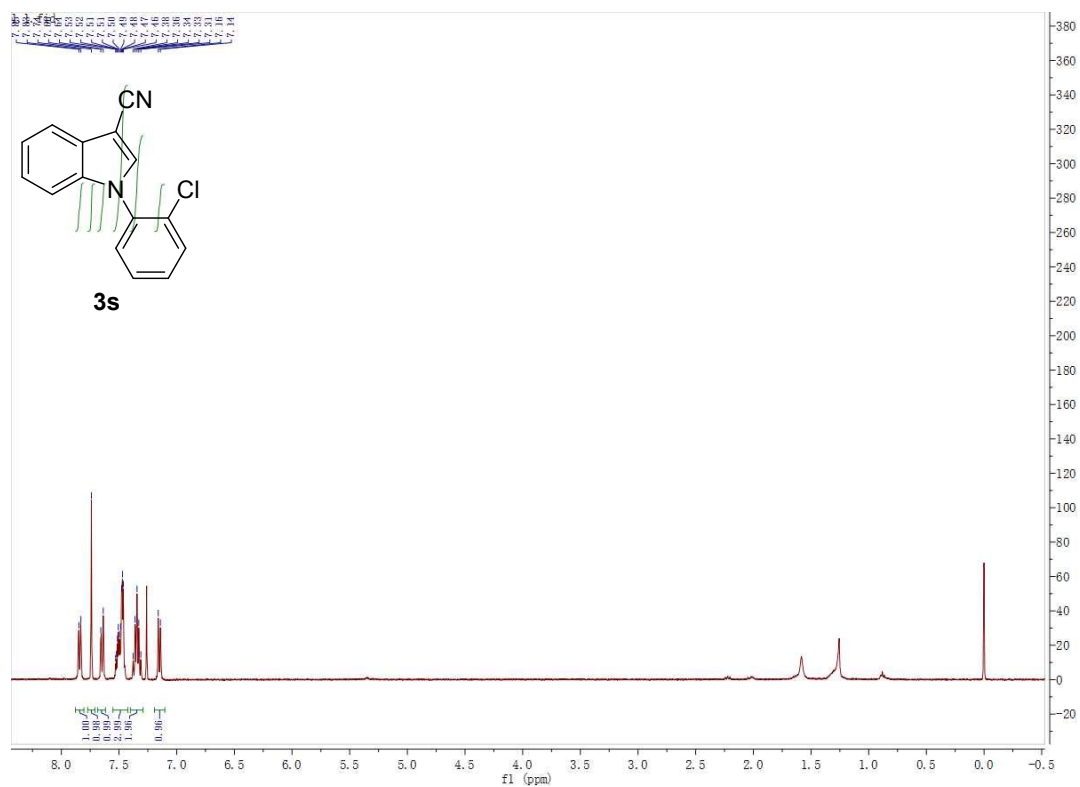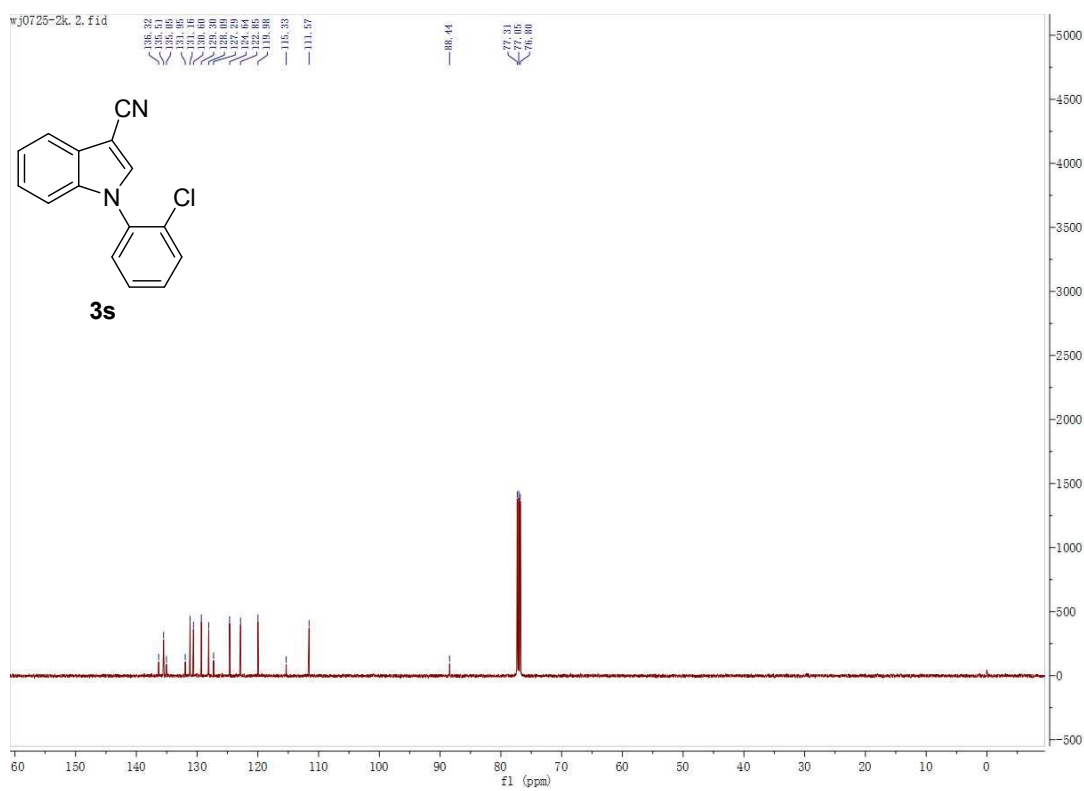

**3t**

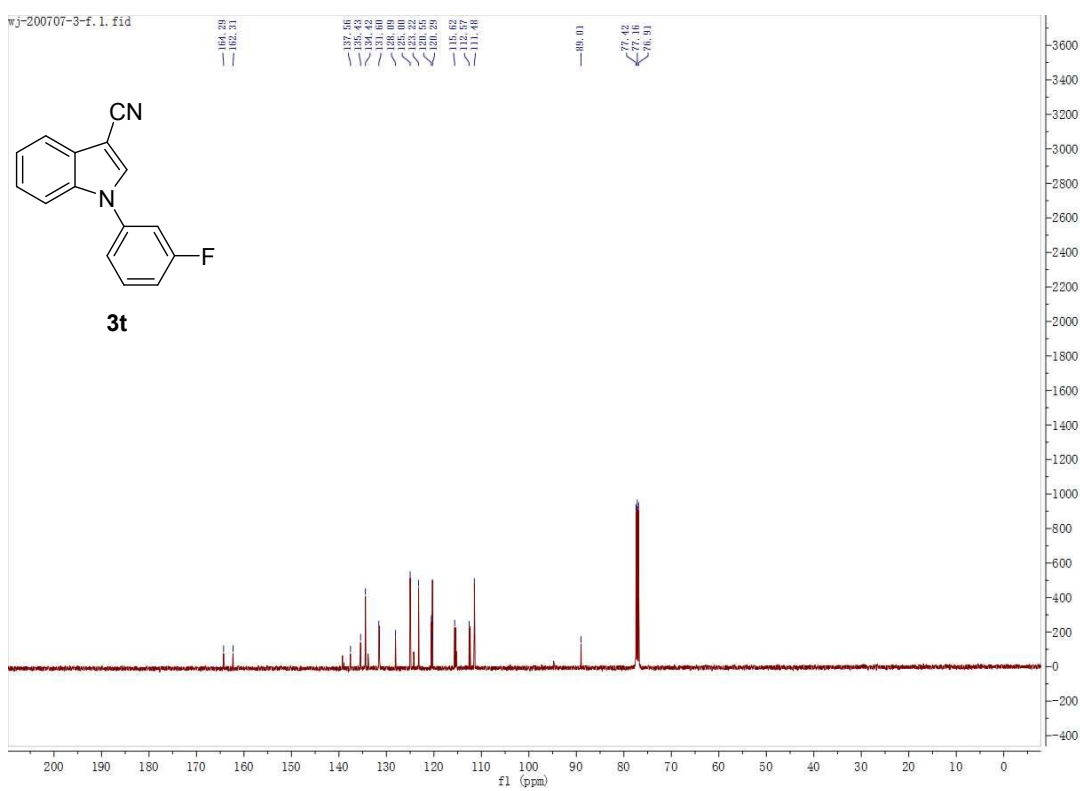

1.1.fid

N#Cc1c[n(c2ccc(F)cc2)nc1-c1ccccc1]

**3u**

7.84 7.83 7.48 7.43 7.38 1.28 0.00

1.00 1.00 2.00 2.00 2.00 3.00 3.00

f1 (ppm)

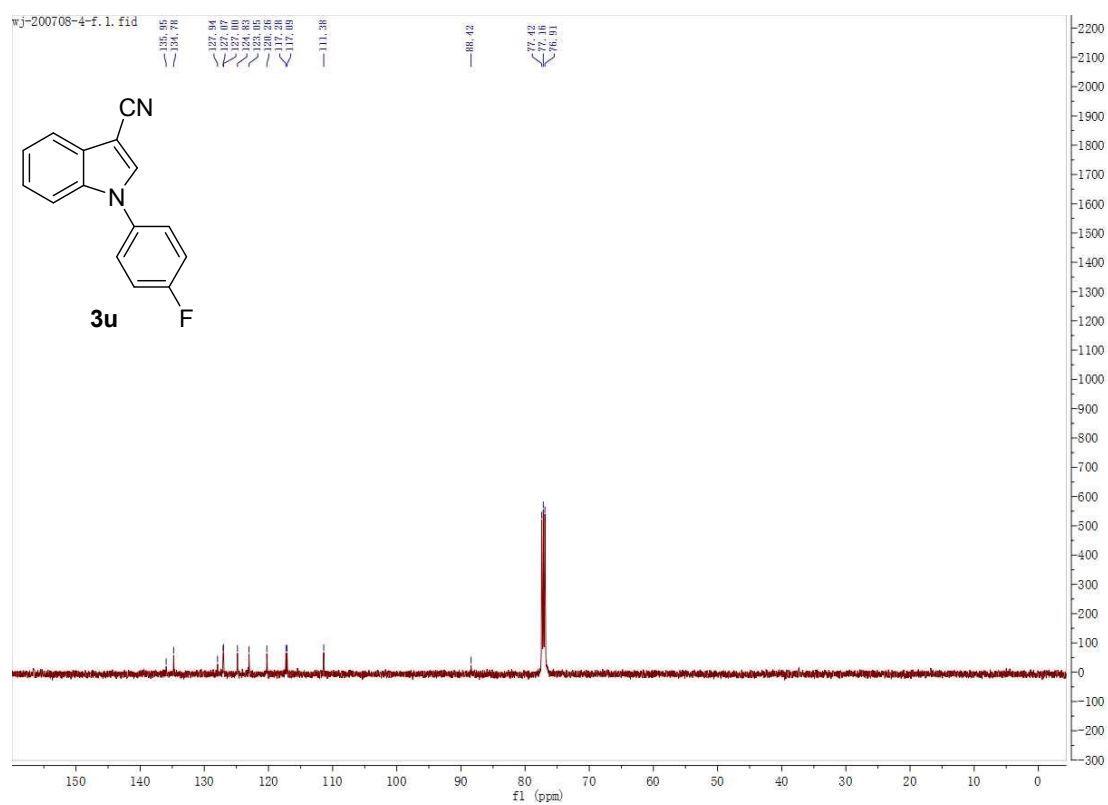

compound **3v**

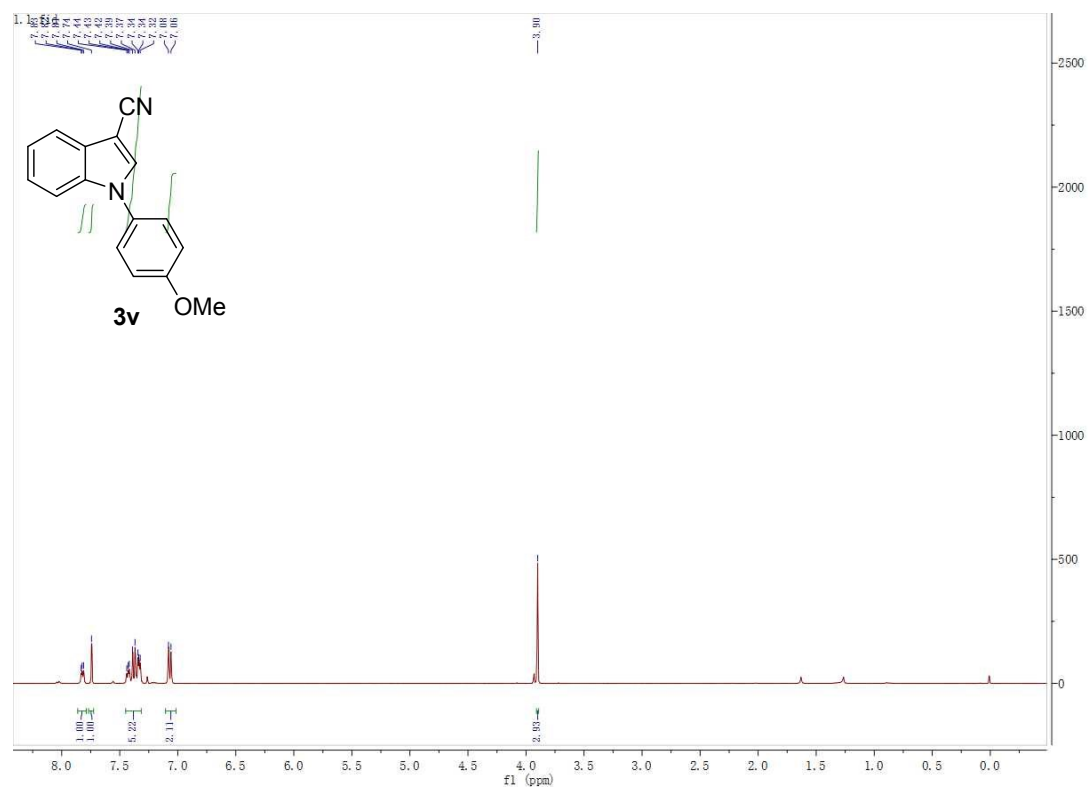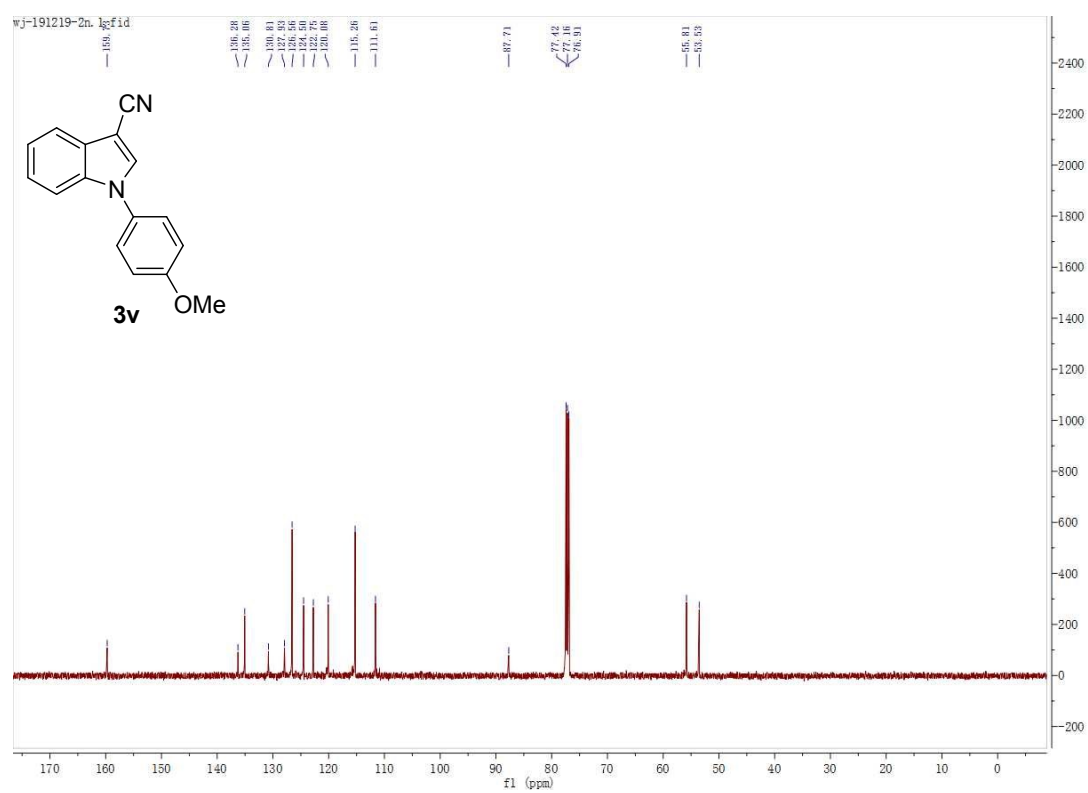

Chemical structure of compound **3w** is shown. The structure is 1-(2-cyano-2-phenylpropyl)-2-phenyl-1H-indole-3-carbonitrile. The  $^1\text{H}$  NMR spectrum (CDCl<sub>3</sub>) shows peaks in the aromatic region (7.0–8.0 ppm), a cyano group triplet (~2.0 ppm), and aliphatic signals (1.0–2.5 ppm). Integration values are provided below the baseline.

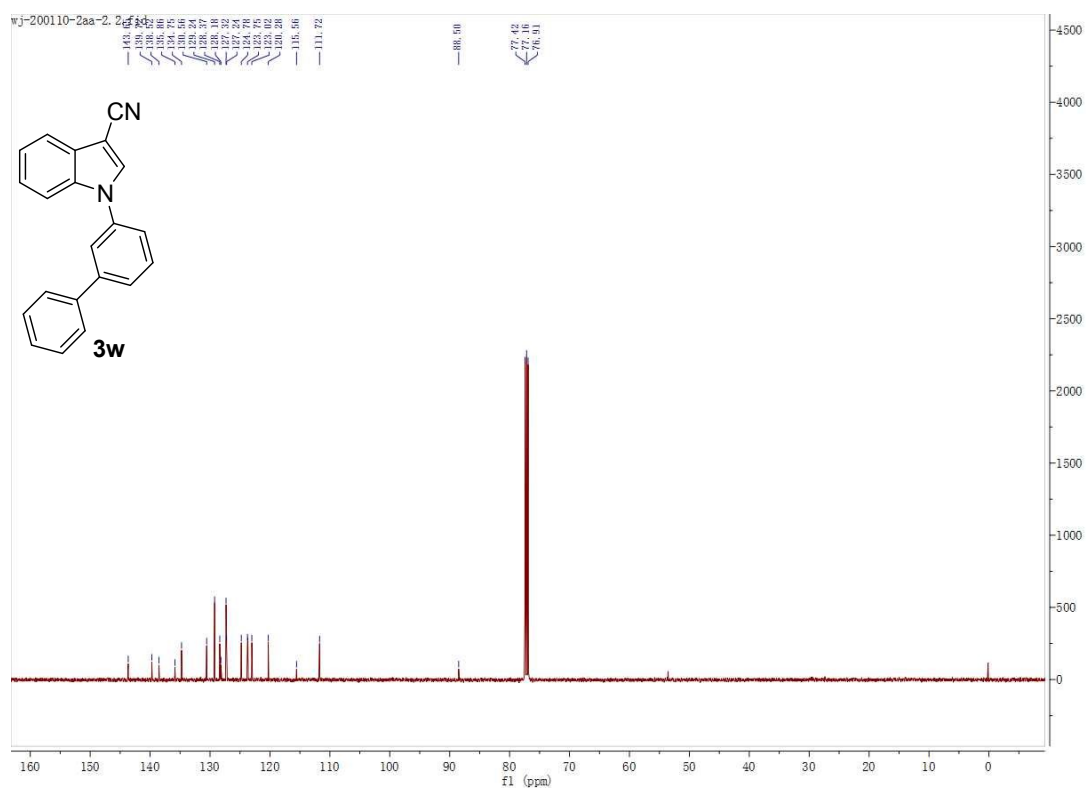

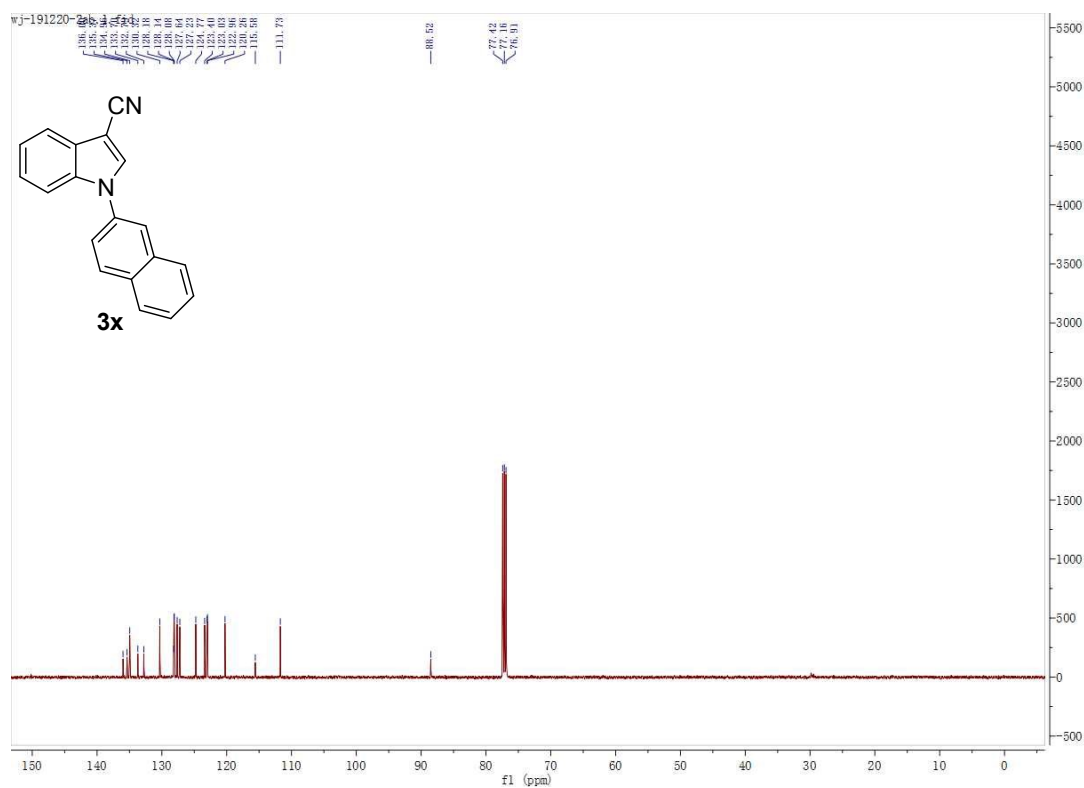

compound **6v**

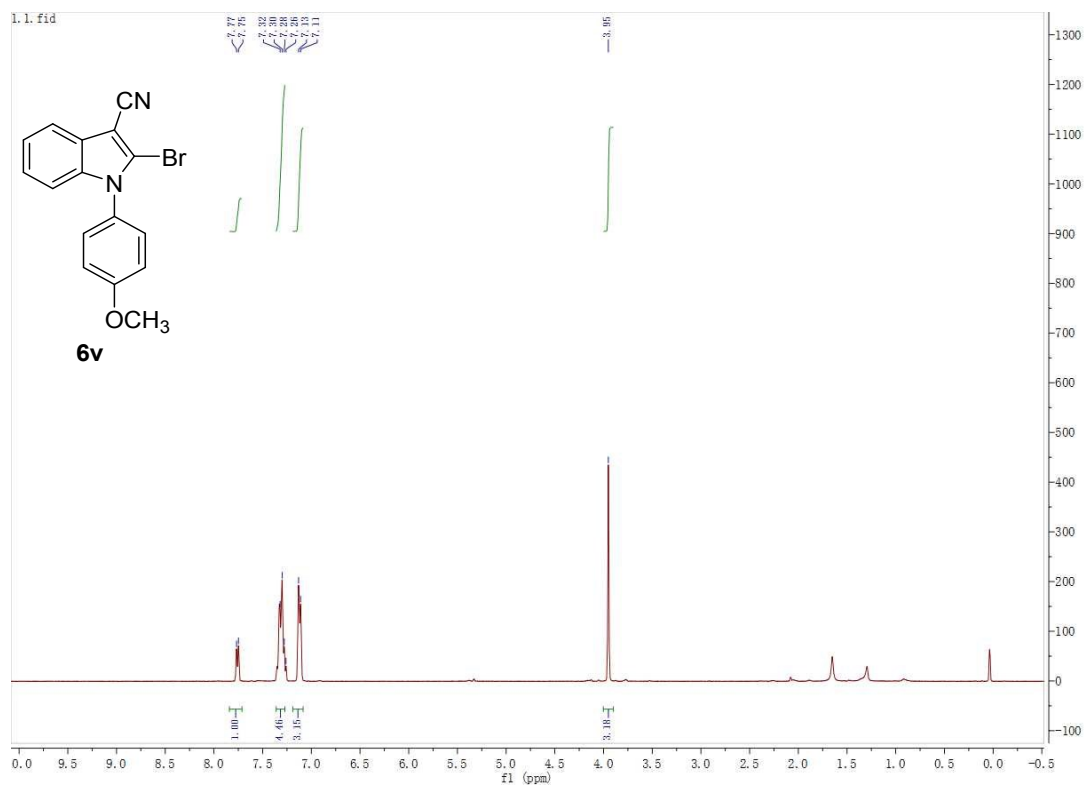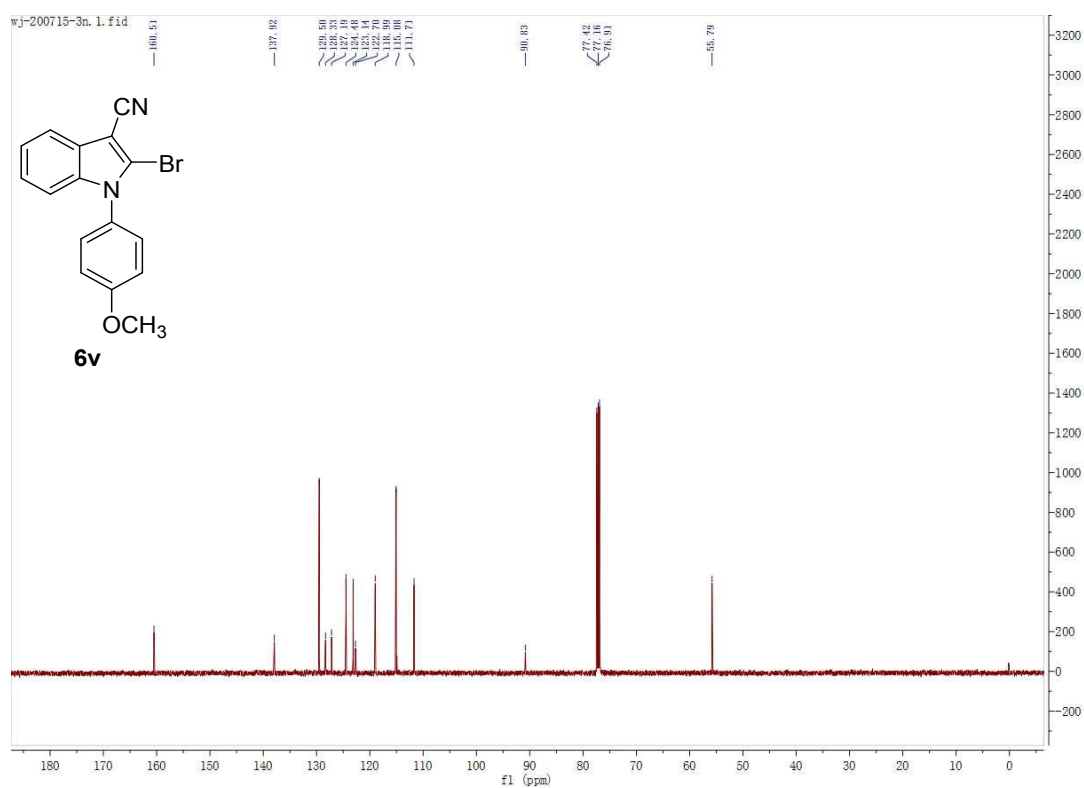

compound **7h**

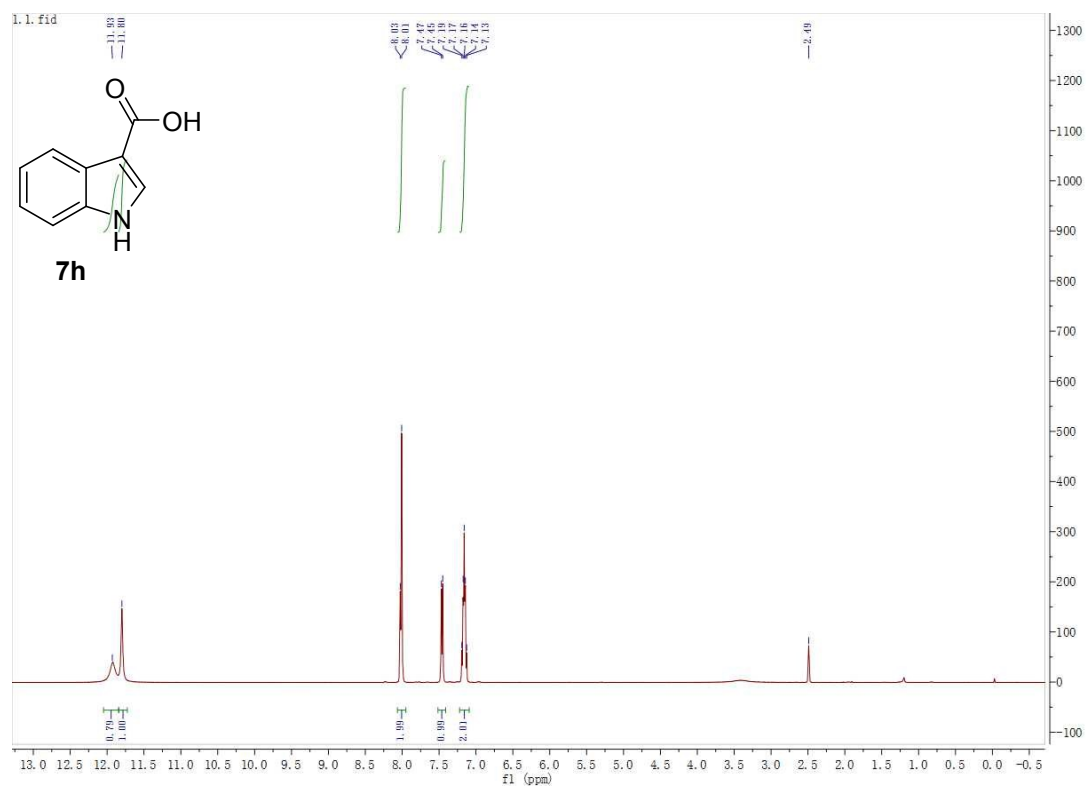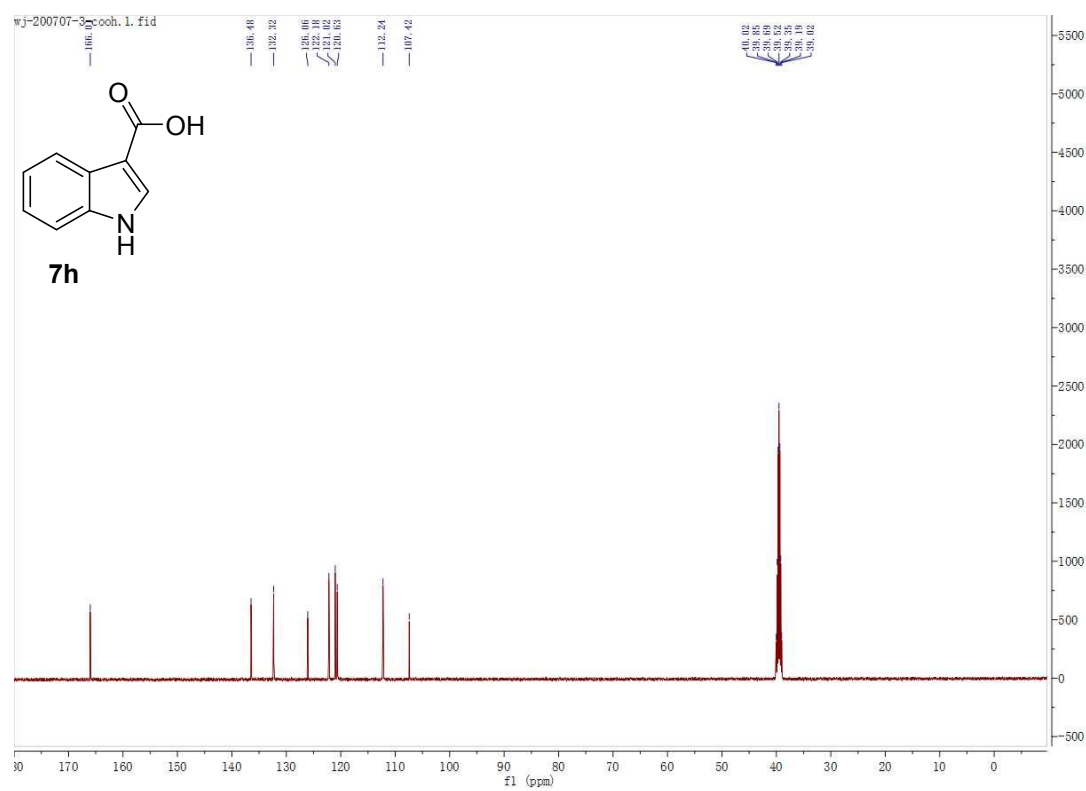

compound **8h**

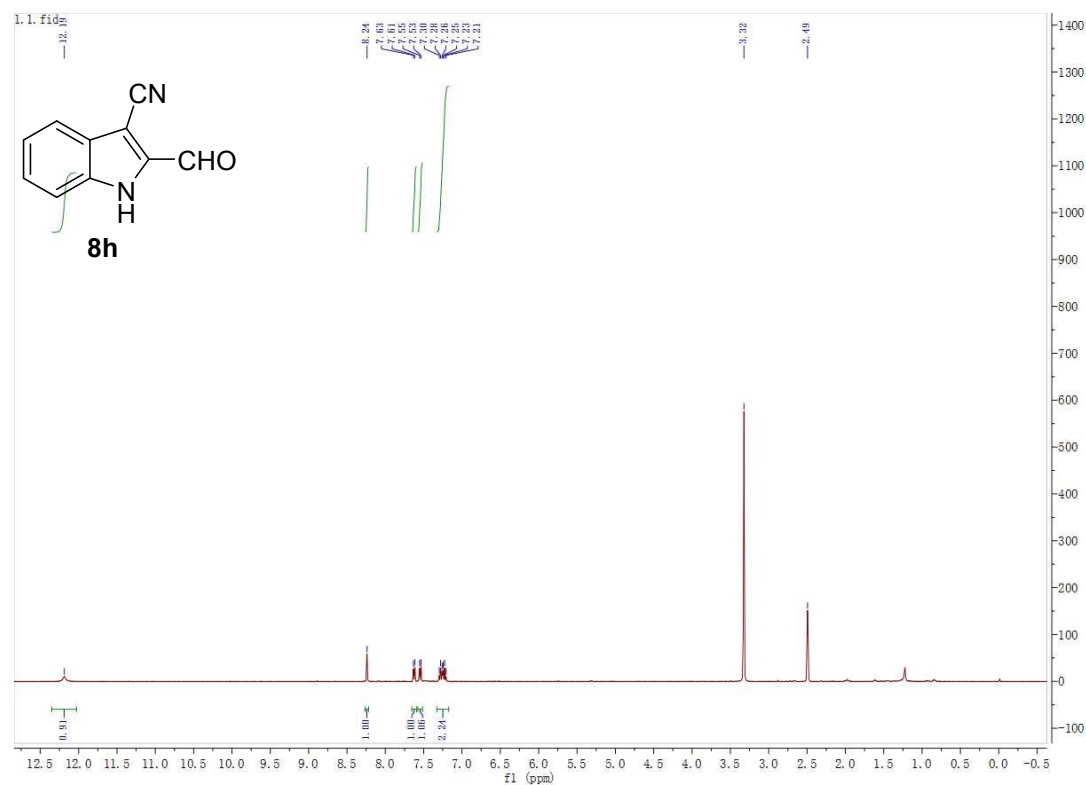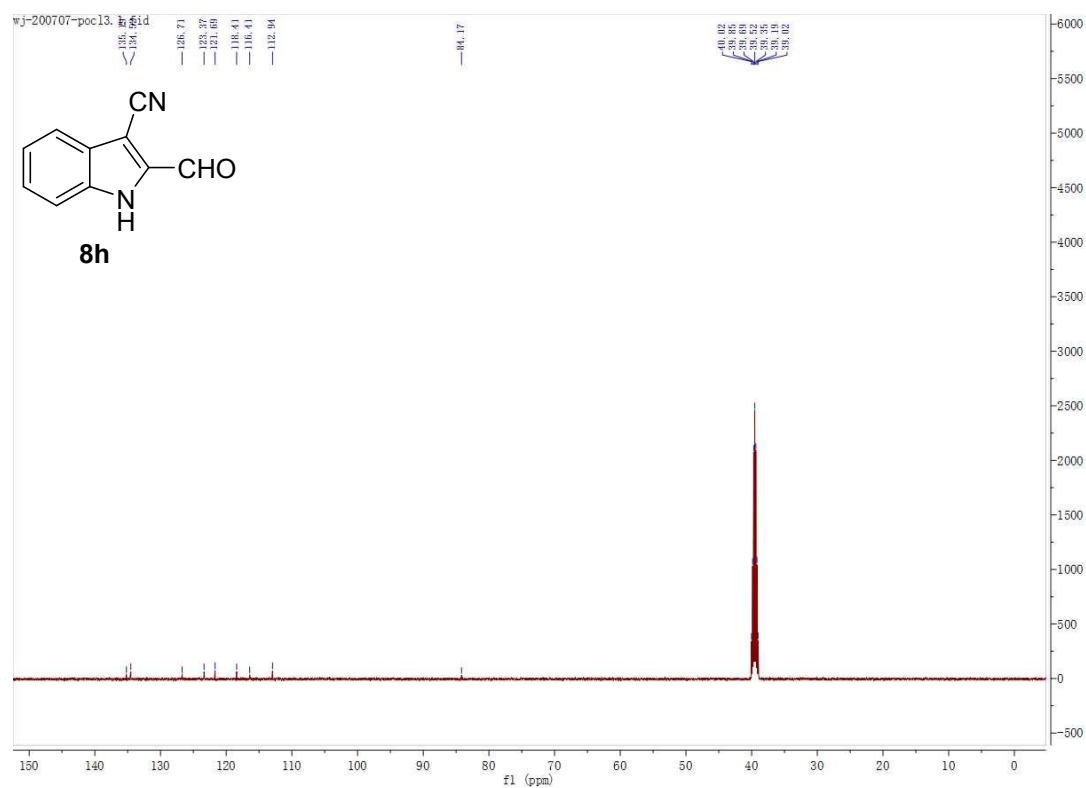

compound

4h

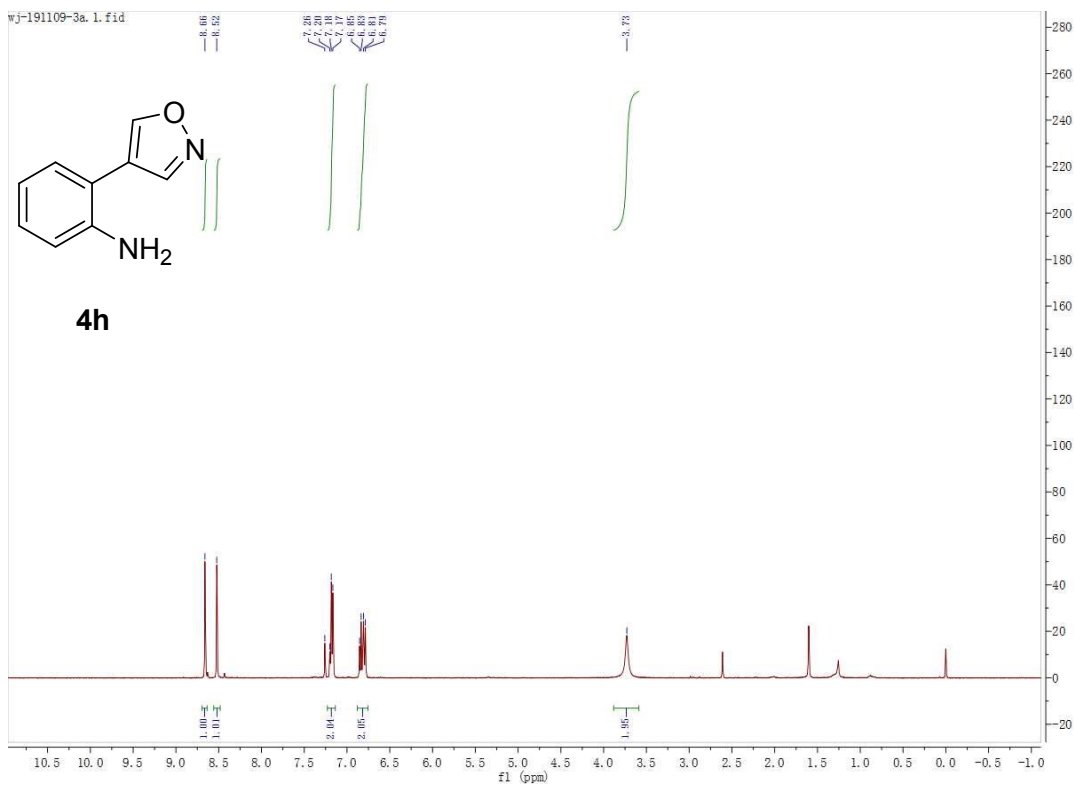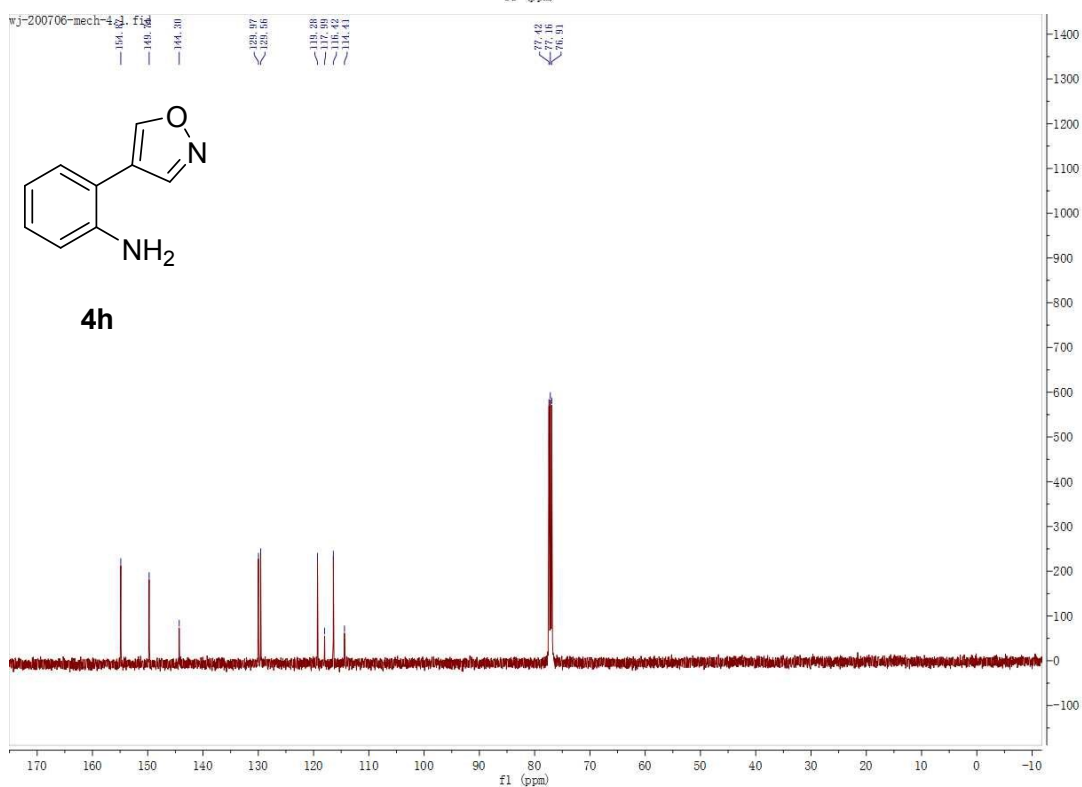

compound **4y**

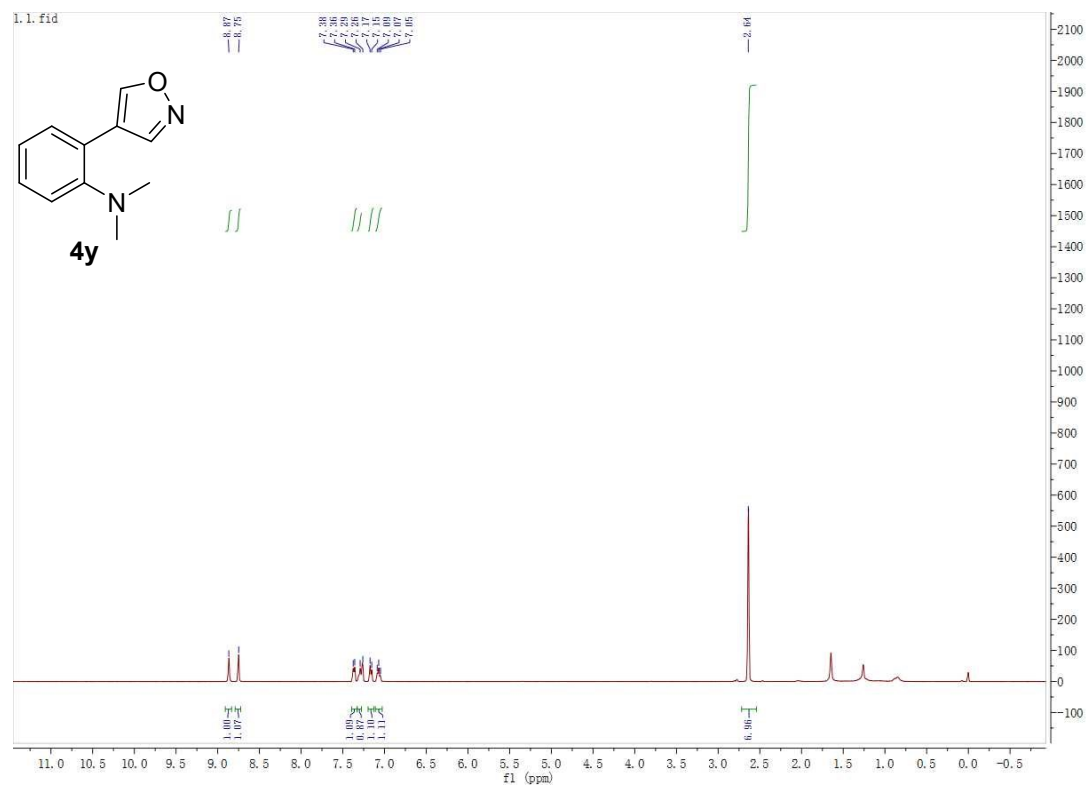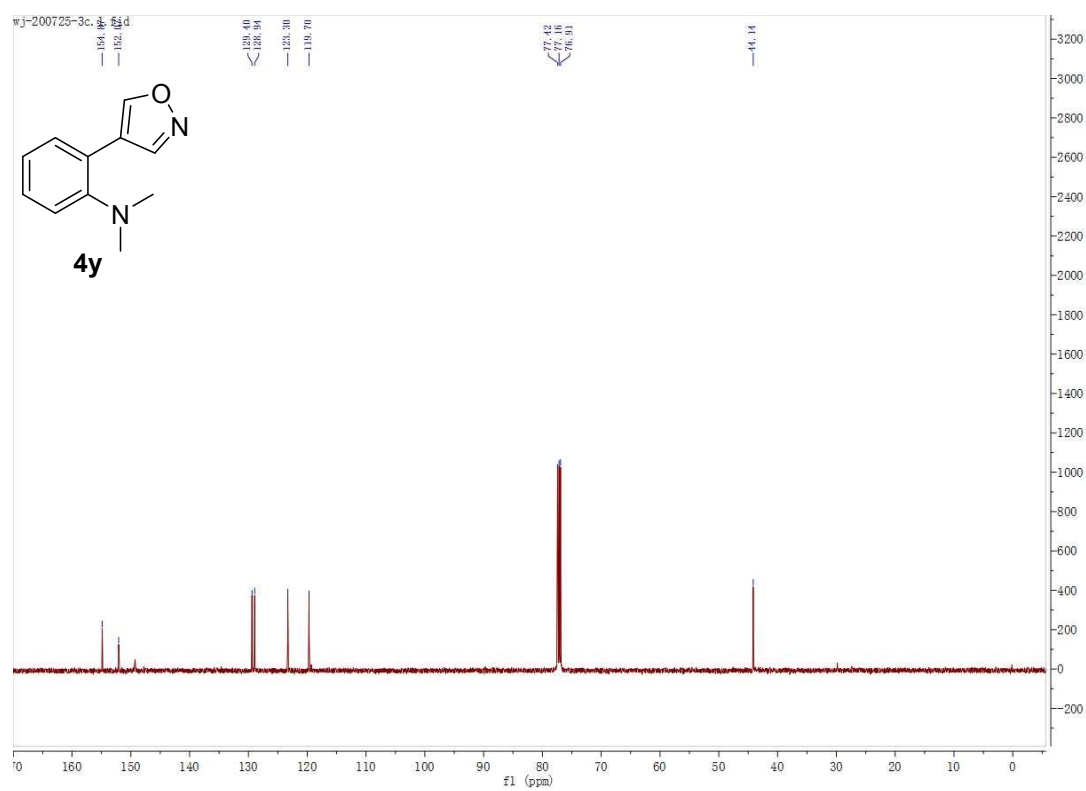

compound **5y**

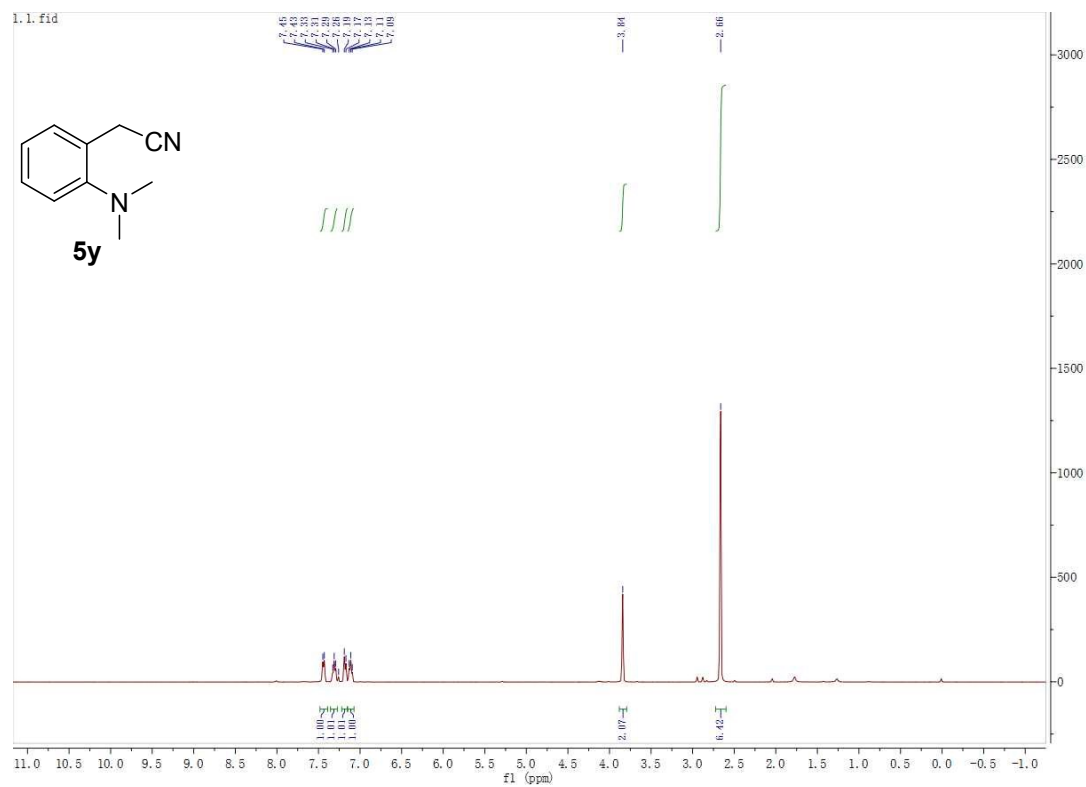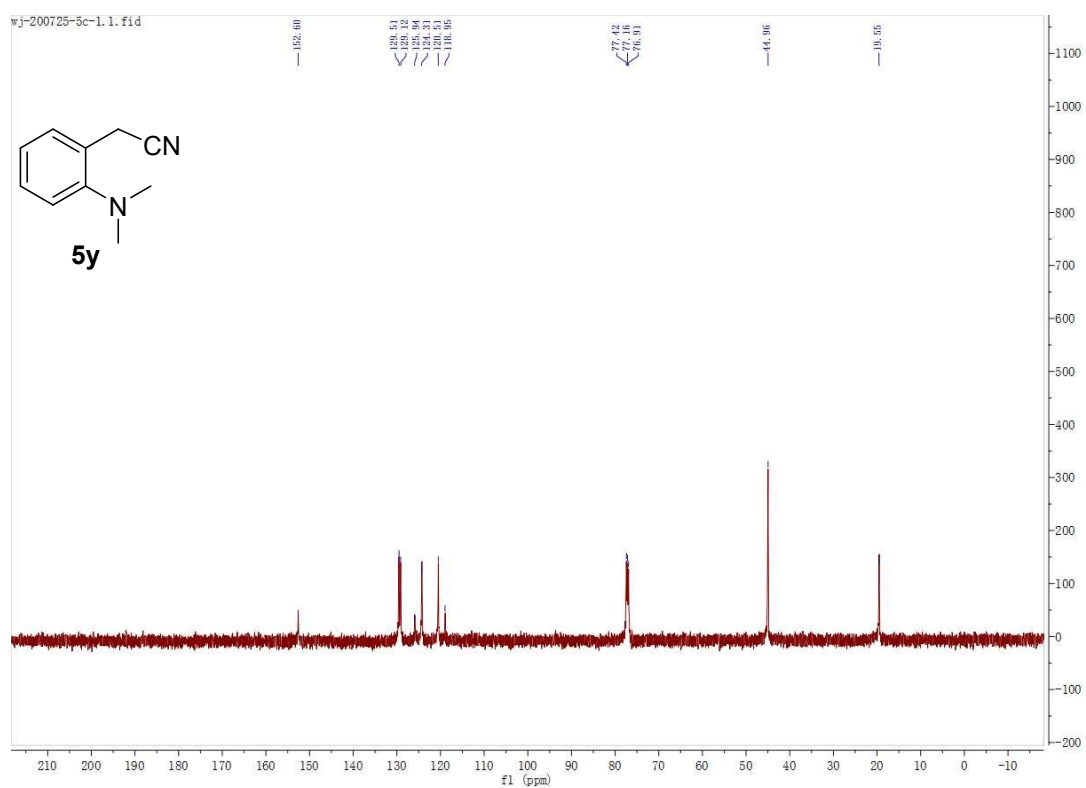

Supplement: d0cc05439a1.pdf [file d0cc05439a1.pdf]
